# Supplementary material for: Combining geometric constraint and redox non-innocence within an ambiphilic PBiP pincer ligand
Source: Royal Society of Chemistry journal article supplement (doi:10.1039/d4sc00197d), 2024-01-01
Supplement: d4sc00197d1.pdf [file d4sc00197d1.pdf]

## Table of Contents

|                                                                |     |
|----------------------------------------------------------------|-----|
| Materials and Methods.....                                     | S2  |
| Synthetic Procedures .....                                     | S3  |
| Spectroscopic Data.....                                        | S5  |
| Cyclic voltammetry.....                                        | S23 |
| Single Crystal X-ray Diffraction.....                          | S26 |
| Crystallographic Details of 1.....                             | S26 |
| Crystallographic Details of 2.....                             | S30 |
| Crystallographic Details of 3.....                             | S36 |
| Crystallographic Details of 4.....                             | S43 |
| X-ray Absorption Near Edge Structure (XANES) spectroscopy..... | S51 |
| Computational Details.....                                     | S53 |
| XYZ-coordinates .....                                          | S54 |
| Computational Analysis of 2 .....                              | S66 |
| Computational Analysis of 3 .....                              | S69 |
| Computational Analysis of 4 .....                              | S74 |
| References .....                                               | S76 |

## Materials and Methods

All experiments with air-sensitive compounds were carried out in a glovebox or in a fume hood employing Schlenk techniques under a dry Ar atmosphere. Traces of water and oxygen were removed via heating of glassware under vacuum prior to use.

All solvents except THF were dried and degassed by a MBraun solvent purification system. THF was dried over sodium, distilled and stored over molecular sieves. Deuterated solvents were degassed via three freeze-pump-thaw cycles and stored over molecular sieves.

NMR spectra were recorded on AVANCE II 300 MHz, Bruker Avance 400 MHz and Bruker Avance III 500 MHz NMR spectrometers except for DOSY NMR experiments which were recorded on a Bruker AVANCE 600 MHz NMR. Chemical shifts are referenced to the signal of residual protonated solvent.

IR spectra were recorded on a Bruker ALPHA spectrometer with an ATR sampling unit.

Elemental analyses were performed with a HEKA Euro 3000EA elemental analyzer.

UV-vis-spectra were measured in a 1 cm quartz cuvette using an Agilent 8453 UV-vis-spectrophotometer with an Unisoku USP-203-A cryostat. Fluorescence spectroscopy was performed on a Cary Eclipse in 1 cm quartz cuvettes.

Cyclic voltammetry was performed in a glovebox with a PalmSens Emstat3<sup>+</sup> Blue potentiostat using a glassy carbon working electrode, a Pt wire as counter electrode and an Ag wire as pseudo-reference electrode.

All commercially available chemicals were used without purification unless otherwise noted. BiCl<sub>3</sub> which was sublimed at 260 °C in the dark. Ferrocene was sublimed twice and [NBu<sub>4</sub>]PF<sub>6</sub> was dried at 120 °C for 2 days before use. 2,7,9,9-tetramethyl-4,5-dinitro-9,10-dihydroacridine<sup>[48]</sup> and Bi(NMe<sub>2</sub>)<sub>3</sub><sup>[S1]</sup> were synthesized according to literature procedures.

## Synthetic Procedures

**Synthesis of diphenylphosphinomethanol:** Paraformaldehyde (1.00 g, 33.0 mmol, 1.00 eq.) and HPPH<sub>2</sub> (6.03 mL, 34.6 mmol, 1.05 eq.) are placed in a J-Young ampoule and heated to 100 °C for 3 h. After cooling to room temperature, hexane (10 mL) is added and the reaction mixture is sonicated for 5 minutes. The organic layer is decanted and the procedure is repeated once. The oily residue is dissolved in benzene (5 mL) and filtered. Lyophilization out of benzene yields diphenylphosphinomethanol (6.50 g, 30.1 mmol, 91 %) as a brittle white solid.

NMR: (C<sub>6</sub>D<sub>6</sub>, 25 °C): <sup>1</sup>H (300 MHz): δ (ppm) = 7.49 – 7.43 (m, 4H, C<sub>ortho</sub>H), 7.10 – 7.01 (m, 6H, C<sub>meta/para</sub>H), 4.17 (dd, <sup>2</sup>J<sub>HP</sub> = 8.2 Hz, <sup>3</sup>J<sub>HH</sub> = 5.2 Hz, CH<sub>2</sub>), 1.60 – 1.55 (br, 1H, OH); <sup>13</sup>C{<sup>1</sup>H} (75.5 MHz): δ (ppm) = 138.4 (d, <sup>1</sup>J<sub>CP</sub> = 13.0 Hz, 2C, C<sub>ipso</sub>), 135.2 (d, <sup>2</sup>J<sub>CP</sub> = 17.7 Hz, 4C, C<sub>ortho</sub>), 130.6 (s, 2C, C<sub>para</sub>), 130.5 (d, <sup>3</sup>J<sub>CP</sub> = 6.4 Hz, 4C, C<sub>meta</sub>); <sup>31</sup>P{<sup>1</sup>H} (121 MHz): δ (ppm) = –11.1 (s, 1P).

IR: (ATR, solid, 25 °C): ν (cm<sup>-1</sup>) = 3374 (br), 1431 (m), 1007 (s), 736 (s), 689 (s).

Elem. Anal. found (calcd) for C<sub>13</sub>H<sub>13</sub>OP: C, 72.2 (72.2); H, 6.20 (6.06).

**New large-scale synthesis of 2,7,9,9-tetramethyl-9,10-dihydroacridine-4,5-diamine:** 2,7,9,9-tetramethyl-4,5-dinitro-9,10-dihydroacridine (1.82 g, 5.56 mmol, 1.00 eq.) and Pd/C (400 mg, 10 w%, 0.38 mmol, 0.07 eq.) were suspended in EtOAc (10 mL) and the mixture was degassed via three freeze-pump-thaw cycles. The flask was backfilled with H<sub>2</sub> (1 atm) and stirred at 50 °C for 48 h. After filtration, the solvent was removed and the yellow residue was dissolved in DCM (5 mL) and layered with hexane (30 mL). Storing the flask at -30 °C for 3 days resulted in the formation of white crystalline needles that were isolated via filtration and washed twice with hexane (5 mL). 2,7,9,9-tetramethyl-9,10-dihydroacridine-4,5-diamine (1.23 mg, 4.60 mmol, 82%) was isolated as a white powder. The NMR data matched the prior reported one.<sup>[48]</sup>

Elem. Anal. found (calcd) for C<sub>17</sub>H<sub>21</sub>N<sub>3</sub> (267.4): C, 75.8 (76.4); H, 7.99 (7.92); N, 15.4 (15.7).

**Synthesis of 1:** 2,7,9,9-tetramethyl-9,10-dihydroacridine-4,5-diamine (500 mg, 1.87 mmol, 1.00 eq.) and diphenylphosphinomethanol (849 mg, 3.92 mmol, 2.10 eq.) are dissolved in DCM (10 mL) and stirred at 25 °C for 16 h. The solvent is removed, the residue is washed with cold Et<sub>2</sub>O (2 x 5 mL) and dried overnight. **1** (721 mg, 1.09 mmol, 58%) is obtained as a white powder.

NMR: (C<sub>6</sub>D<sub>6</sub>, 25 °C): <sup>1</sup>H (500 MHz): δ (ppm) = 7.84 – 7.44 (m, 8H, PPh<sub>2</sub>), 7.09 – 7.02 (m, 12H, PPh<sub>2</sub>), 6.94 (d, <sup>4</sup>J<sub>HH</sub> = 1.7 Hz, 2H, C<sub>aryl</sub>H), 6.53 (d, <sup>4</sup>J<sub>HH</sub> = 1.7 Hz, 2H, C<sub>aryl</sub>H), 6.13 (s, 2H, NH), 3.71 (dd, <sup>3</sup>J<sub>HH</sub> = 6.2 Hz, <sup>3</sup>J<sub>HP</sub> = 3.0 Hz, NCH<sub>2</sub>P), 3.16 (bt, <sup>3</sup>J<sub>HH</sub> = 6.2 Hz, 1H NH), 2.30 (s, 6H, C<sub>aryl</sub>Me), 1.67 (s, 6H, C<sub>aryl</sub>Me); <sup>13</sup>C{<sup>1</sup>H} (125.7 MHz) δ (ppm) = 137.9 – 137.8 (4C), 135.7 – 135.6 (2C), 133.4 – 132.3 (8C), 129.9 – 129.8 (4C), 129.0 – 128.9 (12C), 128.4 (2C), 118.9 (2C, C<sub>aryl</sub>H), 114.4 (2C, C<sub>aryl</sub>H), 46.3 (d, <sup>1</sup>J<sub>CP</sub> = 7.6 Hz, 2C, NCH<sub>2</sub>P), 36.6 (s, 1C, CMe<sub>2</sub>), 32.3 (s, 2C, C<sub>aryl</sub>Me), 21.8 (s, 2C, CMe<sub>2</sub>); <sup>31</sup>P{<sup>1</sup>H} (121 MHz) δ (ppm) = –18.6 (s, 2P, PPh<sub>2</sub>).

IR: (ATR, solid, 25 °C): ν (cm<sup>-1</sup>) = 3322 (br), 1500 (s), 1433 (s), 738 (s), 693 (s).

Elem. Anal. found (calcd) for C<sub>43</sub>H<sub>43</sub>N<sub>3</sub>P<sub>2</sub> (216.2): C, 77.2 (77.8); H, 6.66 (6.53); N, 6.23 (6.33).

**Synthesis of 2: 1** (317 mg, 447 μmol, 1.00 eq.) is dissolved in toluene (5 mL) and Bi(NMe<sub>2</sub>)<sub>3</sub> (163 mg, 447 μmol, 1.00 eq.) is added under exclusion of light. The solution is stirred at 25 °C for 30 min and the solvent is removed. The residue is washed with hexane (2 x 10 mL) and extracted with benzene (2 x 4 mL). Lyophilization out of benzene yields **2** (330 mg, 379 μmol, 85%) as a dark blue powder.

NMR: (C<sub>6</sub>D<sub>6</sub>, 25 °C): <sup>1</sup>H (500 MHz) δ = 7.42 – 7.38 (m, 8H, PPh<sub>2</sub>), 7.10 (br, 2H, C<sub>3/6</sub>H), 7.04 – 6.98 (m, 12H, PPh<sub>2</sub>), 6.73 (d, <sup>4</sup>J<sub>H-H</sub> = 1.5 Hz, 2H, C<sub>1/8</sub>H), 5.98 (d, <sup>2</sup>J<sub>H-P</sub> = 2.5 Hz, 4H, NCH<sub>2</sub>P), 2.85 (s, 6H, C<sub>2/7</sub>Me), 1.80 ppm (s, 6H, C<sub>9</sub>Me<sub>2</sub>); <sup>13</sup>C{<sup>1</sup>H} (125.8 MHz) δ = 155.2 (d, <sup>3</sup>J<sub>C-P</sub> = 8.6 Hz, 2C, C<sub>4/5</sub>), 139.8 (s, 2C, C<sub>2/7</sub>), 139.0 (d, <sup>1</sup>J<sub>C-P</sub> = 13.6 Hz, 4C, C<sub>Ph</sub>), 138.1 (s, 2C), 134.7 (s, 2C), 133.3 (d, <sup>2</sup>J<sub>C-P</sub> = 17.4 Hz, 8C, C<sub>Ph</sub>), 129.1 (s, 4C, C<sub>Ph</sub>), 128.9 (d, <sup>3</sup>J<sub>C-P</sub> = 6.5 Hz, 8C, C<sub>Ph</sub>), 115.6 (s, 2C, C<sub>3/6</sub>), 111.4 (s, 2C, C<sub>1/8</sub>), 53.6 (d, <sup>1</sup>J<sub>C-P</sub> = 4.2 Hz, 2C, NCH<sub>2</sub>P), 37.9 (s, 1C, C<sub>9</sub>), 36.6 (s, 2C, C<sub>9</sub>Me<sub>2</sub>), 21.2 ppm (s, 2C, C<sub>2/7</sub>Me); <sup>31</sup>P{<sup>1</sup>H} (202.5 MHz) δ = –22.2 ppm (br, 2P, PPh<sub>2</sub>).

IR: (ATR, solid, 25 °C): ν (cm<sup>-1</sup>) = 1595 (m), 1430 (m), 1292 (s), 738 (m), 693 (m).

UV/vis: (DCM; 5\*10<sup>-5</sup> M, 25 °C): λ<sub>max</sub> (nm) = 524, 660.

Elem. Anal. found (calcd) for C<sub>43</sub>H<sub>40</sub>BiN<sub>3</sub>P<sub>2</sub> (869.7): C, 60.0 (59.4); H, 4.83 (4.64); N, 4.73 (4.83).

**Synthesis of 3:** **2** (145 mg, 166  $\mu\text{mol}$ , 1.00 eq.) is dissolved in DCM (5 mL) and  $\text{W}(\text{CO})_3(\text{MeCN})_3$  (65.0 mg, 166  $\mu\text{mol}$ , 1.00 eq) is added in one portion. After stirring the reaction mixture for 30 minutes at room temperature in the dark, the solvent is removed and the residue is washed with hexane (2 x 5 mL). Lyophilization out of benzene yields **3** (172 mg, 151  $\mu\text{mol}$ , 91%) as a dark blue powder.

NMR: (DCM, 25 °C):  $^1\text{H}$  (400 MHz)  $\delta$  = 6.71 (s br, 2H,  $\text{C}_{3/6}\text{H}$ ), 6.52 (s br,  $\text{C}_{1/8}\text{H}$ ), 5.80 (br, 2H,  $\text{NCH}_2\text{P}$ ), 5.55 (br, 2H,  $\text{NCH}_2\text{P}$ ), 2.50 (s, 6H,  $\text{C}_{2/7}\text{Me}$ ); Acquisition of  $^{13}\text{C}\{^1\text{H}\}$  NMR data was hindered by significant broadening of the resonances likely caused by slow molecular motion of the cluster in solution;  $^{31}\text{P}\{^1\text{H}\}$  (161.9 MHz)  $\delta$  = 42.3 ppm (s,  $^1J_{\text{P-W}} = 288$  Hz, 2P,  $\text{PPh}_2$ ); NMR (DCM, -60 °C):  $^1\text{H}$  (400 MHz)  $\delta$  = 7.77 – 7.73 (m, 4H,  $\text{PPh}_2$ ), 7.53 – 7.41 (m, 6H,  $\text{PPh}_2$ ), 7.16 – 7.09 (m, 6H,  $\text{PPh}_2$ ), 7.03 – 6.99 (m, 4H,  $\text{PPh}_2$ ), 6.73 (s br, 2H,  $\text{C}_{3/6}\text{H}$ ), 6.48 (s br,  $\text{C}_{1/8}\text{H}$ ), 6.02 (br,  $^2J_{\text{H-H}} = 14.6$  Hz, 2H,  $\text{NCH}_2\text{P}$ ), 5.55 (br,  $^2J_{\text{H-H}} = 14.6$  Hz), 2.52 (s, 6H,  $\text{C}_{2/7}\text{Me}$ ), 1.79 (s, 3H,  $\text{C}_9\text{Me}$ ), 1.20 (s, 3H,  $\text{C}_9\text{Me}$ ).

IR: (ATR, solid, 25 °C):  $\nu$  ( $\text{cm}^{-1}$ ) = 1846 (s, CO), 1826 (s, CO), 1431 (w), 1281 (m), 694 (m).

UV/vis: (DCM;  $5 \times 10^{-5}$  M, 25 °C):  $\lambda_{\text{max}}$  (nm) = 590, 774.

Elem. Anal. found (calcd) for  $\text{C}_{46}\text{H}_{40}\text{BiN}_3\text{O}_3\text{P}_2\text{W}$  (1137.6): C, 49.1 (48.6); H, 3.54 (3.51); 3.85 (3.69).

**Synthesis of 4:** **2** (51.5 mg, 59.2  $\mu\text{mol}$ , 1.00 eq.) is dissolved in DCM (2 mL) and cooled to -35 °C.  $\text{AuCl}(\text{SMe}_2)$  (17.4 mg, 59.2  $\mu\text{mol}$ , 1.00 eq.) is added in one portion under the exclusion of light and the solution is stirred for 30 minutes while warming to room temperature. The reaction mixture is filtered, layered with  $\text{Et}_2\text{O}$  (8 mL) and stored at -30 °C for 3 d. The dark blueish green precipitate is decanted and the residue is washed with  $\text{Et}_2\text{O}$  (2 x 2 mL). After drying, **4** (43.0 mg, 39.0  $\mu\text{mol}$ , 66%) is obtained as a dark blue microcrystalline powder.

NMR: ( $\text{C}_6\text{D}_6$ , 25 °C):  $^1\text{H}$  (500 MHz)  $\delta$  = 7.61 (d,  $^2J_{\text{H-H}} = 12.0$  Hz, 2H,  $\text{NCH}_2\text{P}$ ), 7.18 – 6.89 (m, 6H,  $\text{PPh}_2$ ), 7.03 – 6.89 (m, 14H,  $\text{PPh}_2$ ), 6.28 (s br, 2H,  $\text{C}_{3/6}\text{H}$ ), 6.08 (d,  $^2J_{\text{H-H}} = 12.0$  Hz, 2H,  $\text{NCH}_2\text{P}$ ), 5.56 (s br, 2H,  $\text{C}_{1/8}\text{H}$ ), 2.39 (s, 6H,  $\text{C}_{2/7}\text{Me}$ ), 1.69 (s, 6H,  $\text{C}_9\text{Me}_2$ ). Acquisition of  $^{13}\text{C}\{^1\text{H}\}$  NMR data was hindered by significant broadening of the resonances likely caused by slow molecular motion of the cluster in solution.  $^{31}\text{P}\{^1\text{H}\}$  (202.5 MHz)  $\delta$  = 59.3 ppm (br, 2P,  $\text{PPh}_2$ ).

IR: (ATR, solid, 25 °C):  $\nu$  ( $\text{cm}^{-1}$ ) = 2916 (m), 1598 (m), 1433 (m), 1284 (s), 689 (m).

UV/vis: (DCM;  $5 \times 10^{-5}$  M, 25 °C):  $\lambda_{\text{max}}$  (nm) = 744.

Elem. Anal. found (calcd) for  $\text{C}_{129}\text{H}_{120}\text{Au}_3\text{Bi}_3\text{Cl}_3\text{N}_9\text{P}_6$  (3306.5): C, 46.8 (46.9); H, 3.60 (3.66); N, 3.79 (3.81).

### Spectroscopic Data

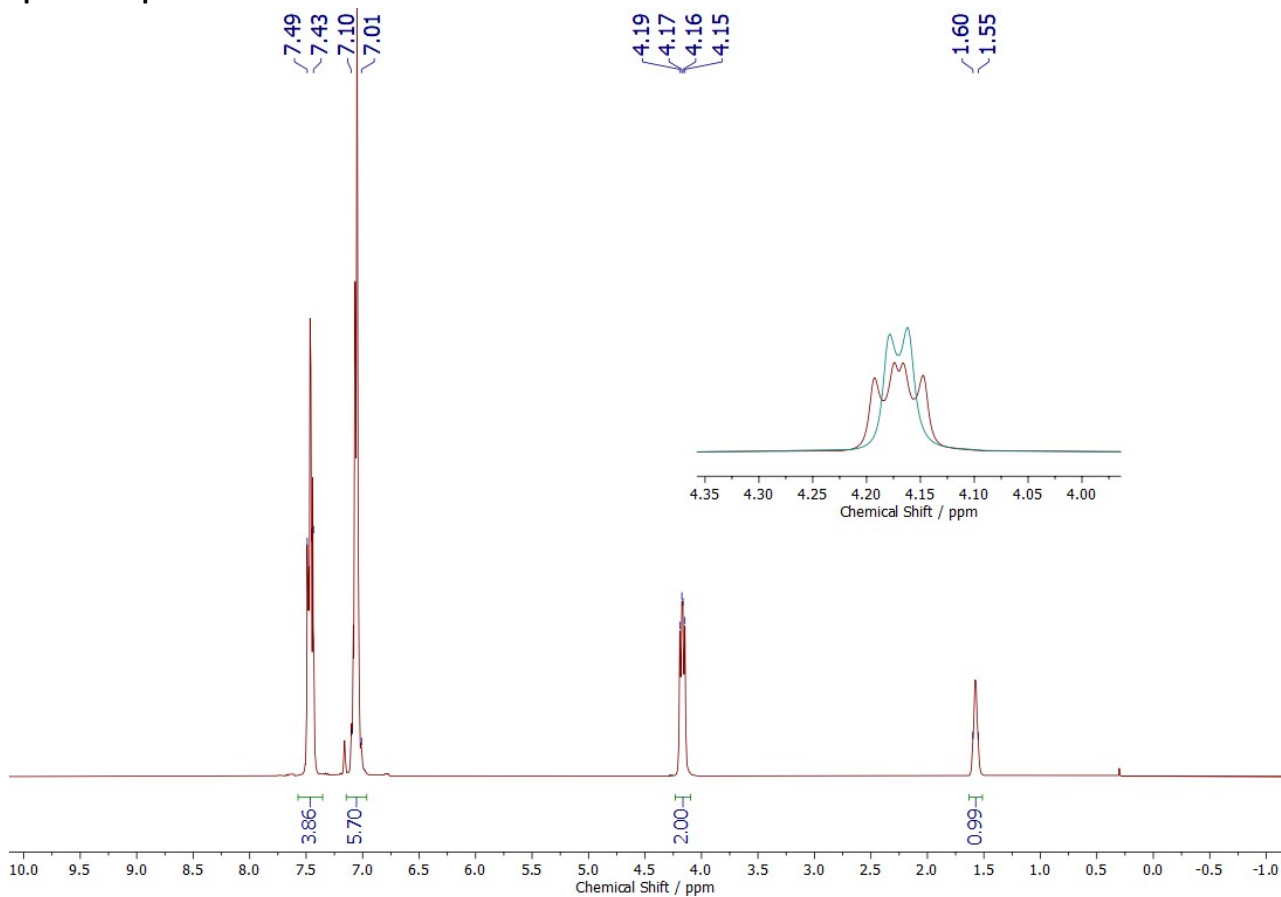

**Figure S1.** <sup>1</sup>H NMR spectrum of diphenylphosphinomethanol, C<sub>6</sub>D<sub>6</sub>, 25 °C; Inset: <sup>1</sup>H (red) and <sup>1</sup>H{<sup>31</sup>P} (teal) NMR spectrum.

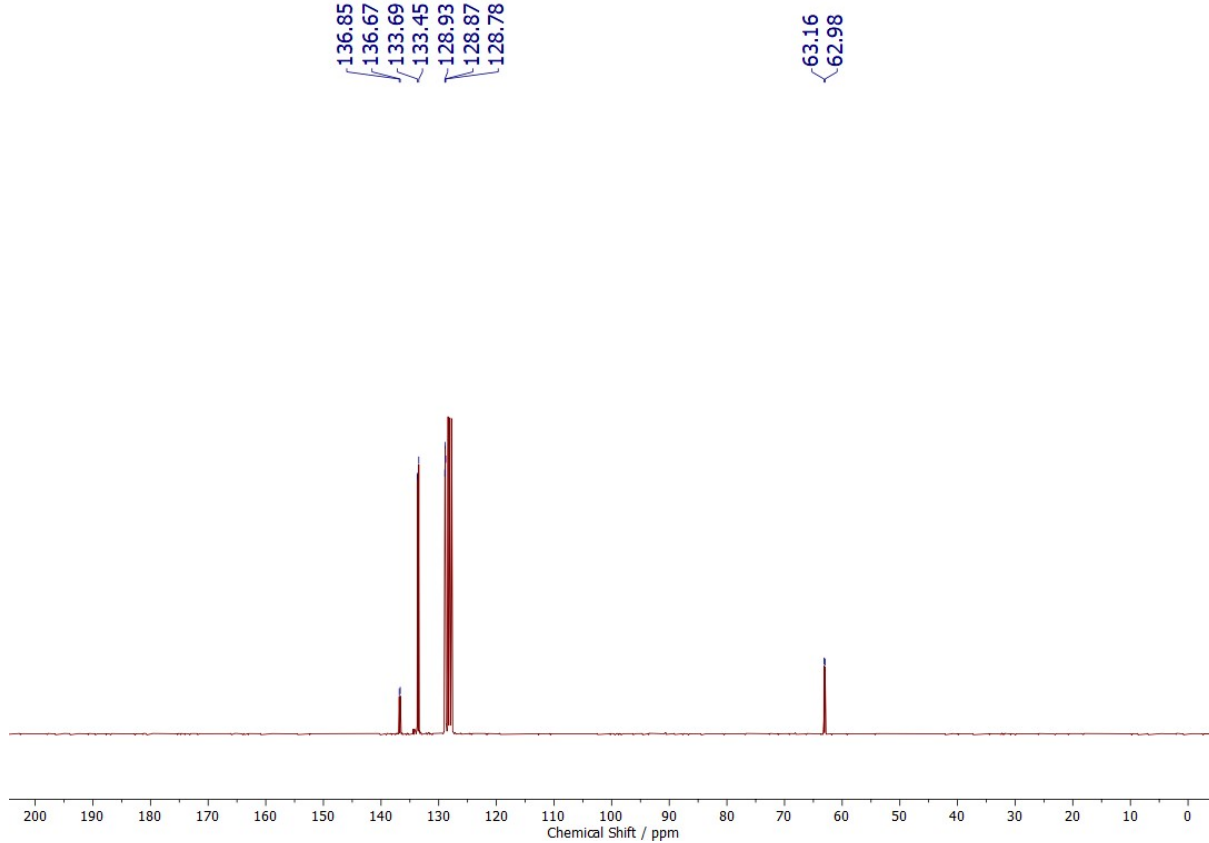

**Figure S2.** <sup>13</sup>C{<sup>1</sup>H} NMR spectrum of diphenylphosphinomethanol, C<sub>6</sub>D<sub>6</sub>, 25 °C.

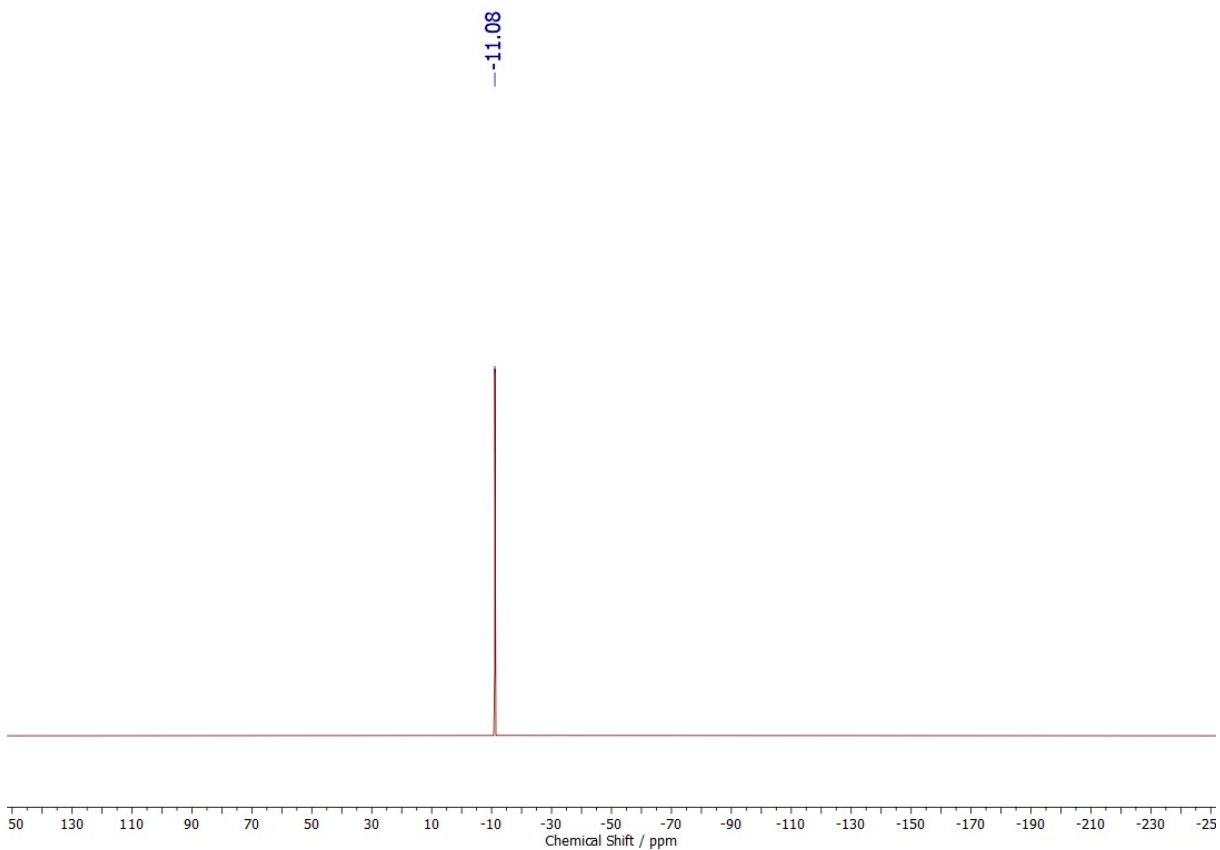

**Figure S3.**  $^{31}\text{P}\{^1\text{H}\}$  NMR spectrum of diphenylphosphinomethanol,  $\text{C}_6\text{D}_6$ , 25 °C

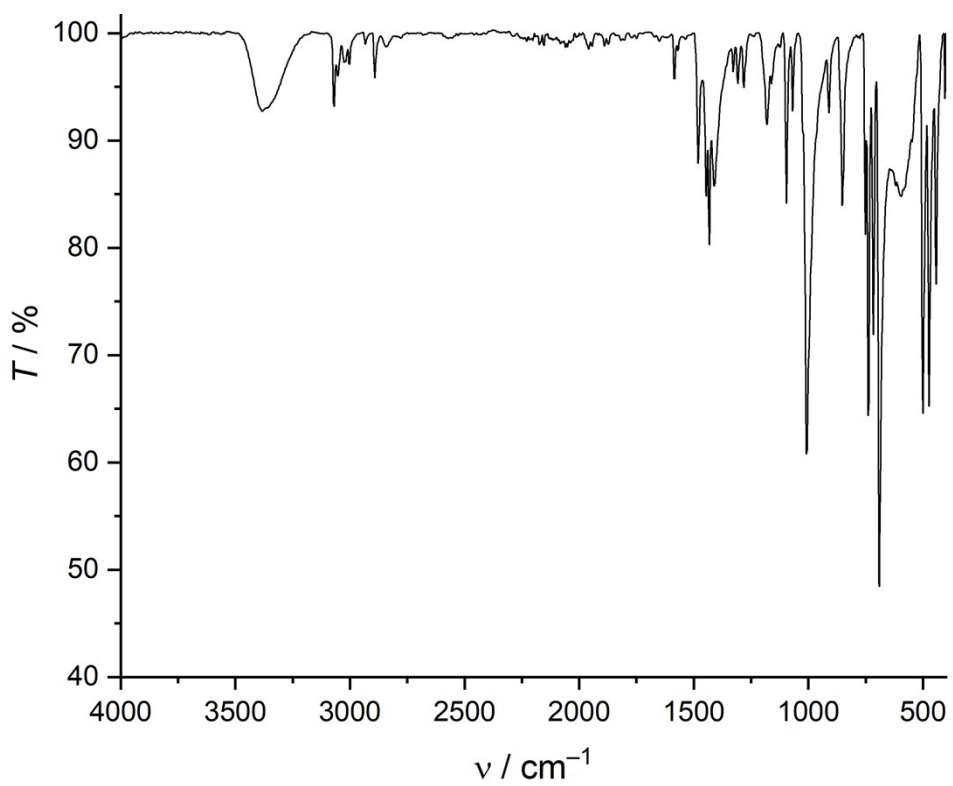

**Figure S4.** ATR-IR spectrum of diphenylphosphinomethanol, solid, 25 °C.

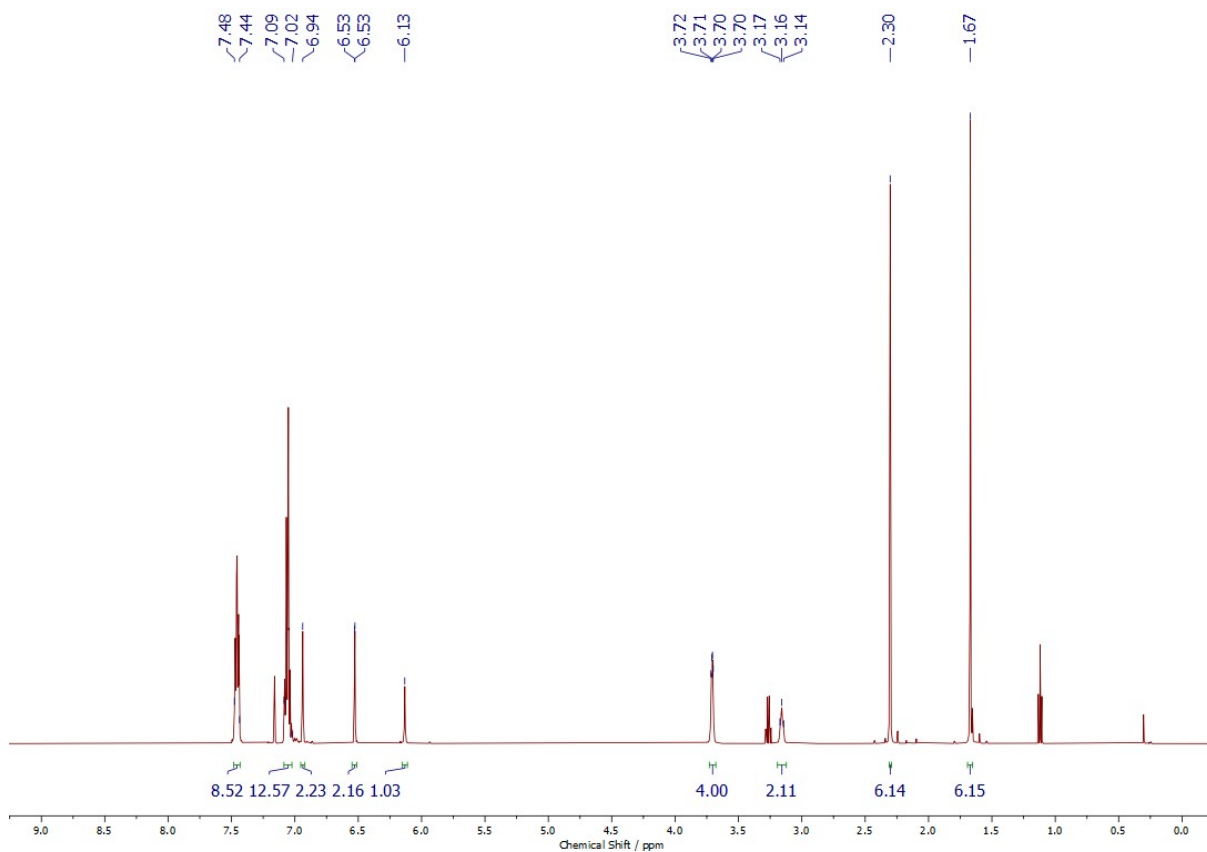

**Figure S5.**  $^1\text{H}$  NMR spectrum of **1**,  $\text{C}_6\text{D}_6$ , 25 °C; unlabeled peaks belong to residual  $\text{Et}_2\text{O}$  that can be removed via extensive drying and grease present in the deuterated solvent.

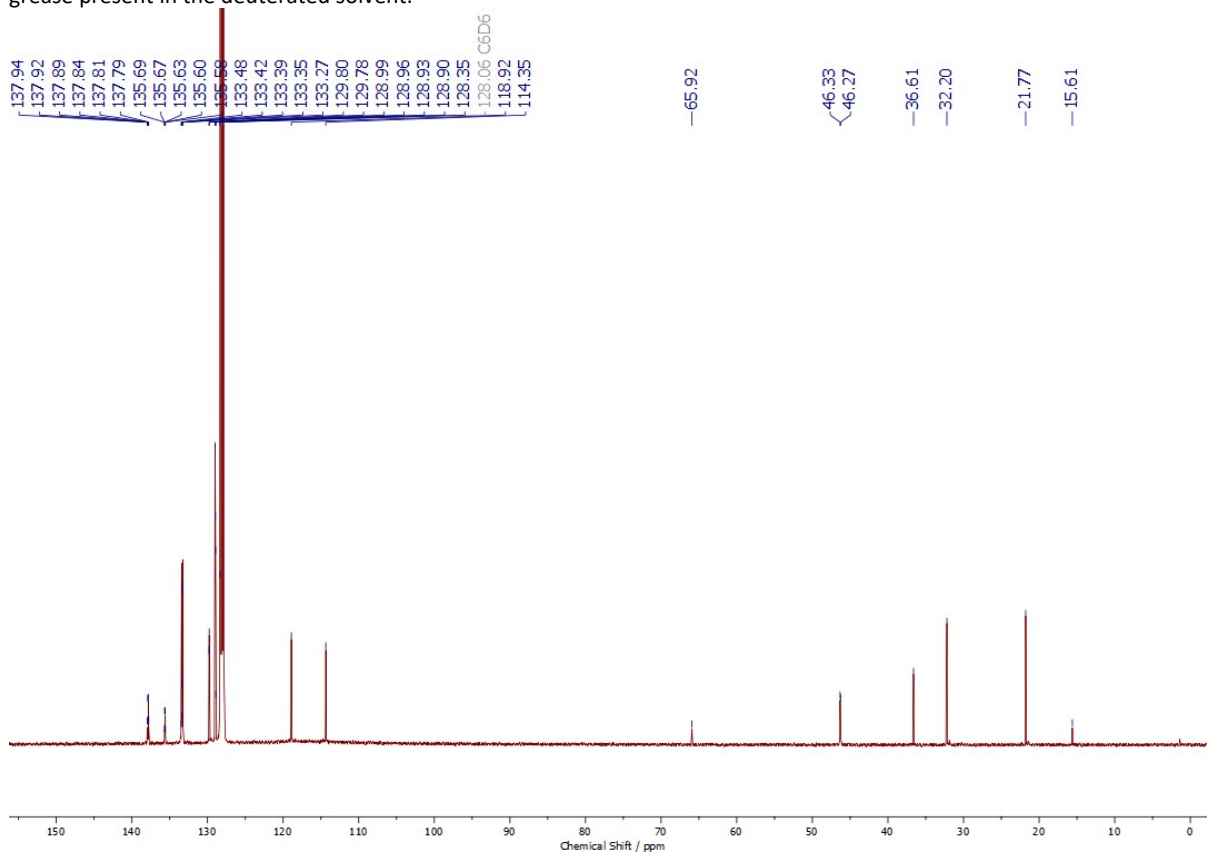

**Figure S6.**  $^{13}\text{C}\{^1\text{H}\}$  NMR spectrum of **1**,  $\text{C}_6\text{D}_6$ , 25 °C.

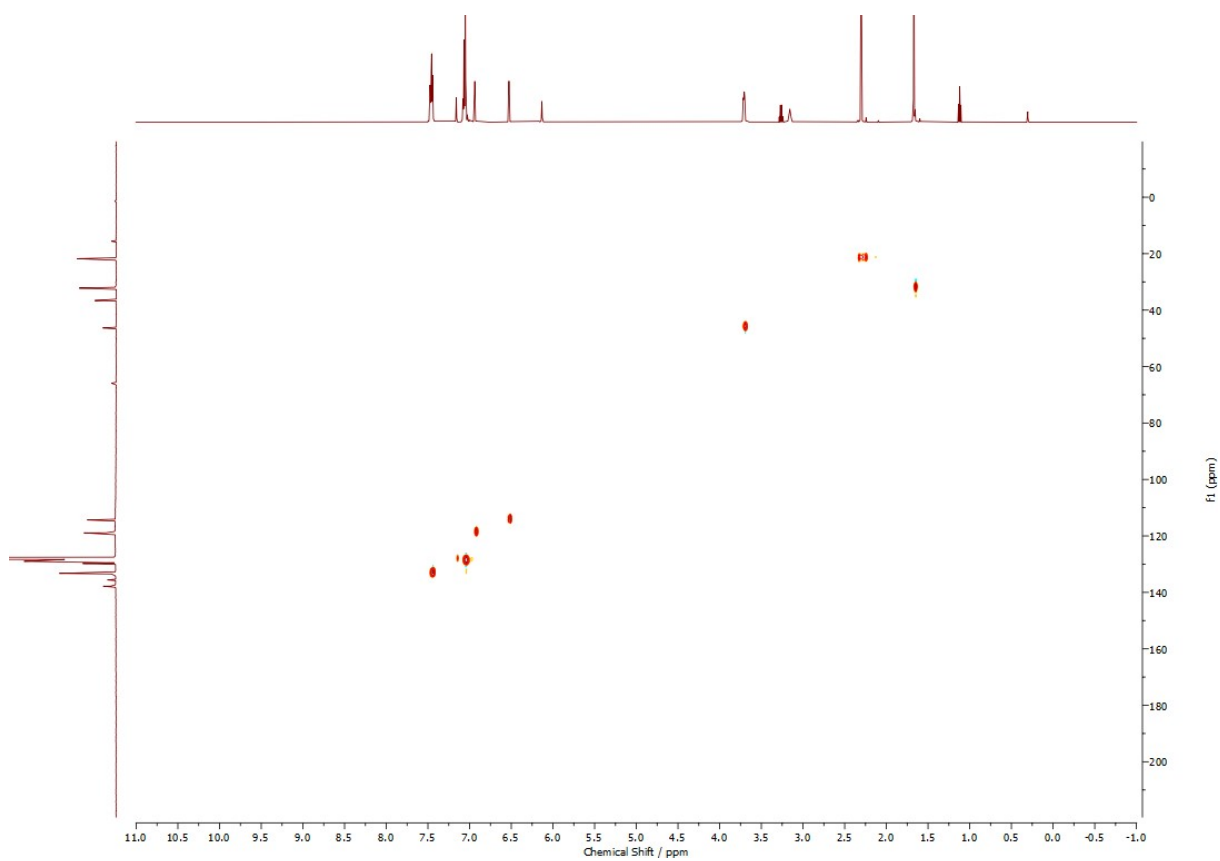

**Figure S7.** HSQC NMR spectrum of **1**, C<sub>6</sub>D<sub>6</sub>, 25 °C.

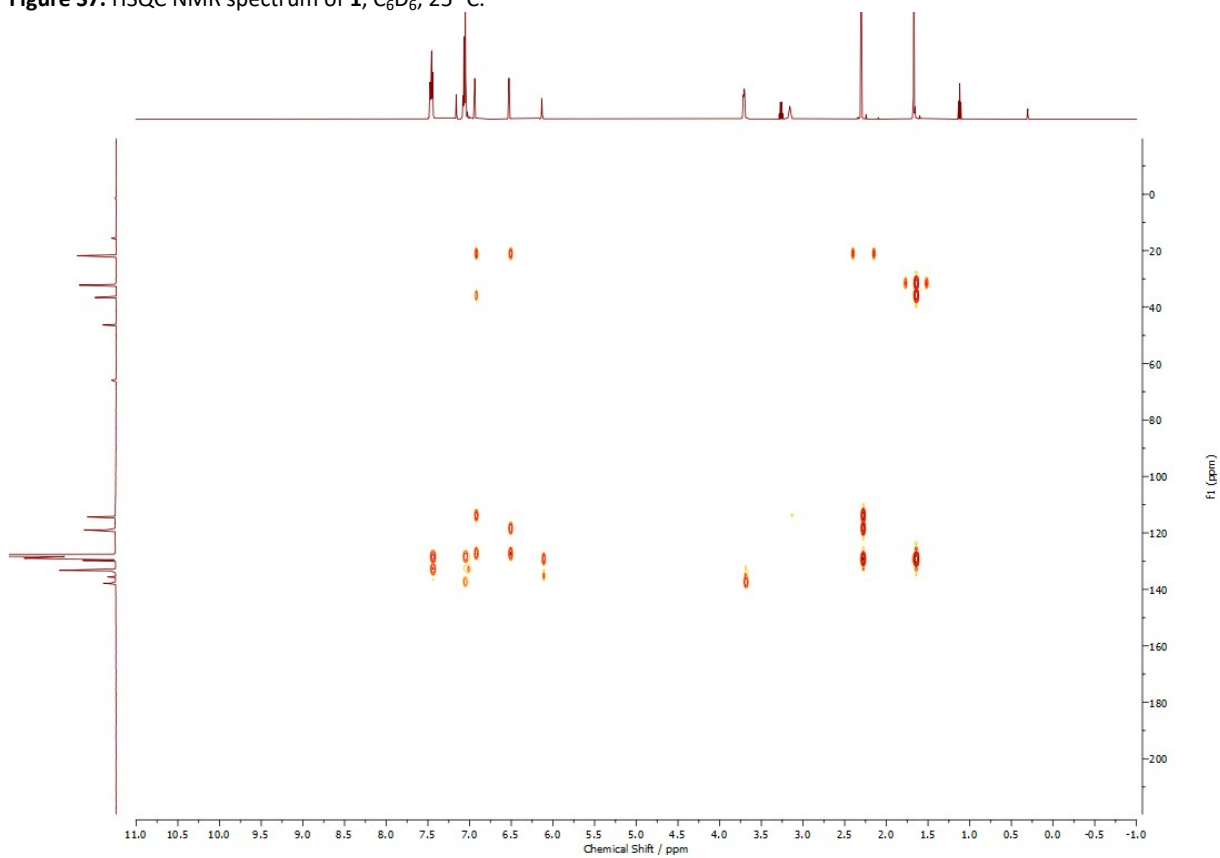

**Figure S8.** HMBC NMR spectrum of **1**, C<sub>6</sub>D<sub>6</sub>, 25 °C.



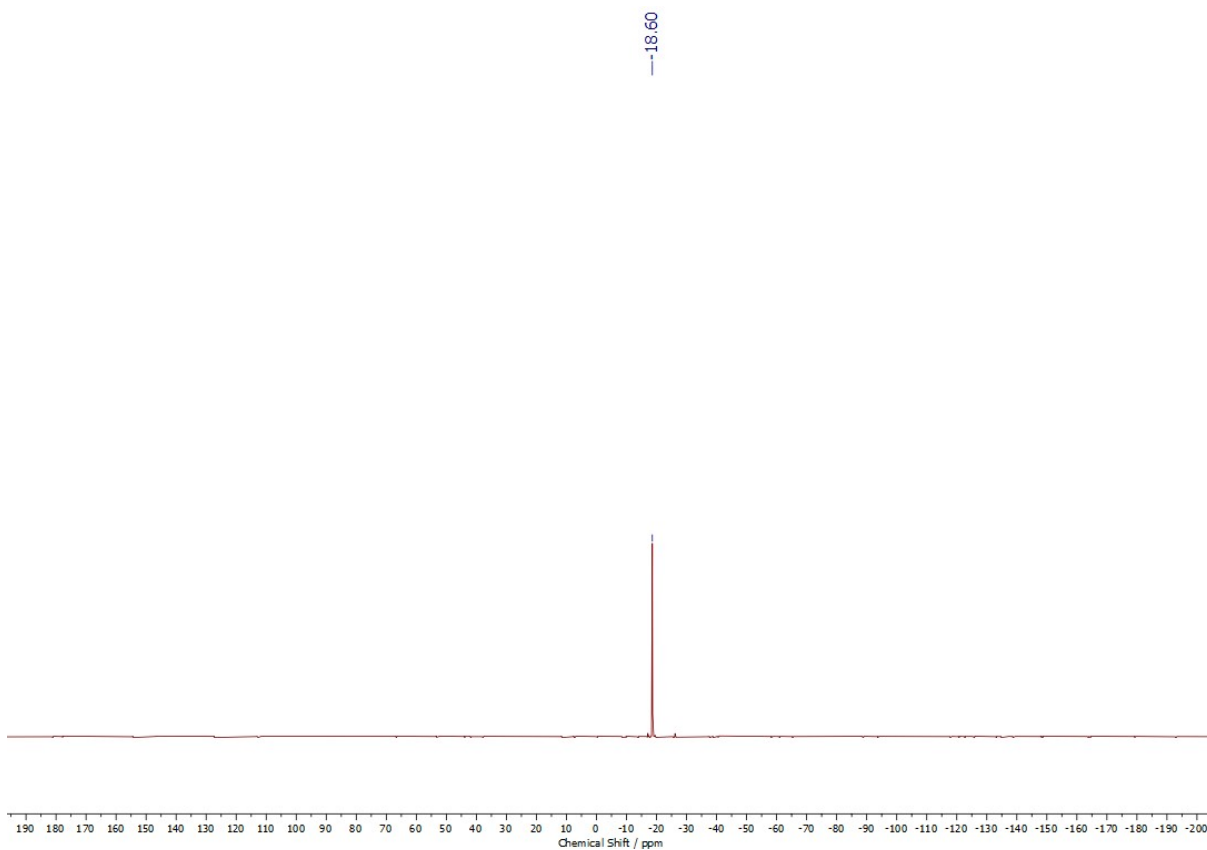

**Figure S9.**  $^{31}\text{P}\{^1\text{H}\}$  NMR spectrum of **1**,  $\text{C}_6\text{D}_6$ , 25 °C.

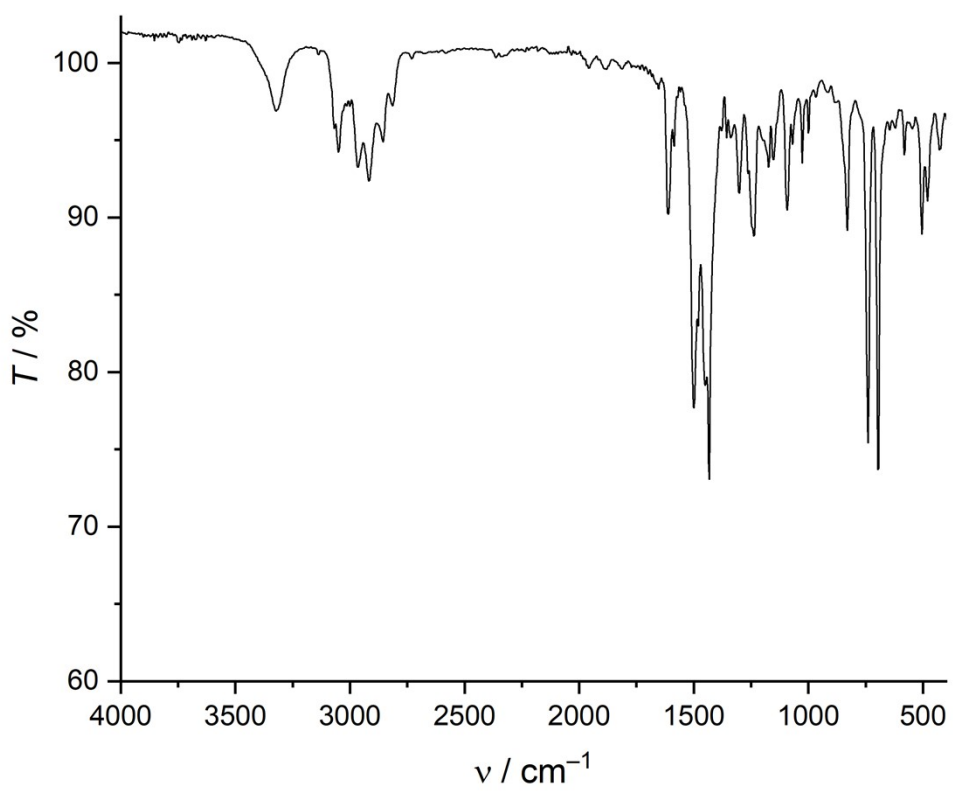

**Figure S10.** ATR-IR spectrum of **1**, solid, 25 °C.

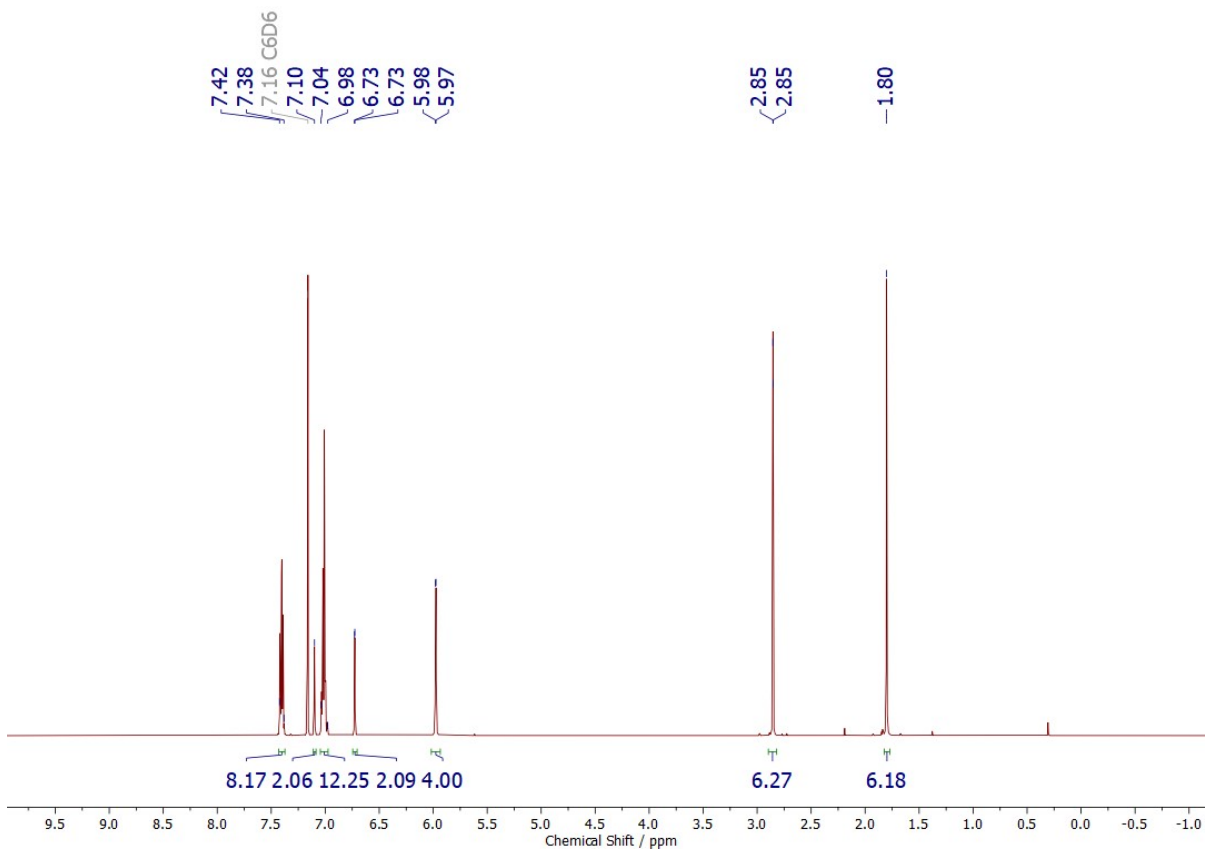

Figure S11.  $^1\text{H}$  NMR spectrum of **2**,  $\text{C}_6\text{D}_6$ , 25  $^\circ\text{C}$ .

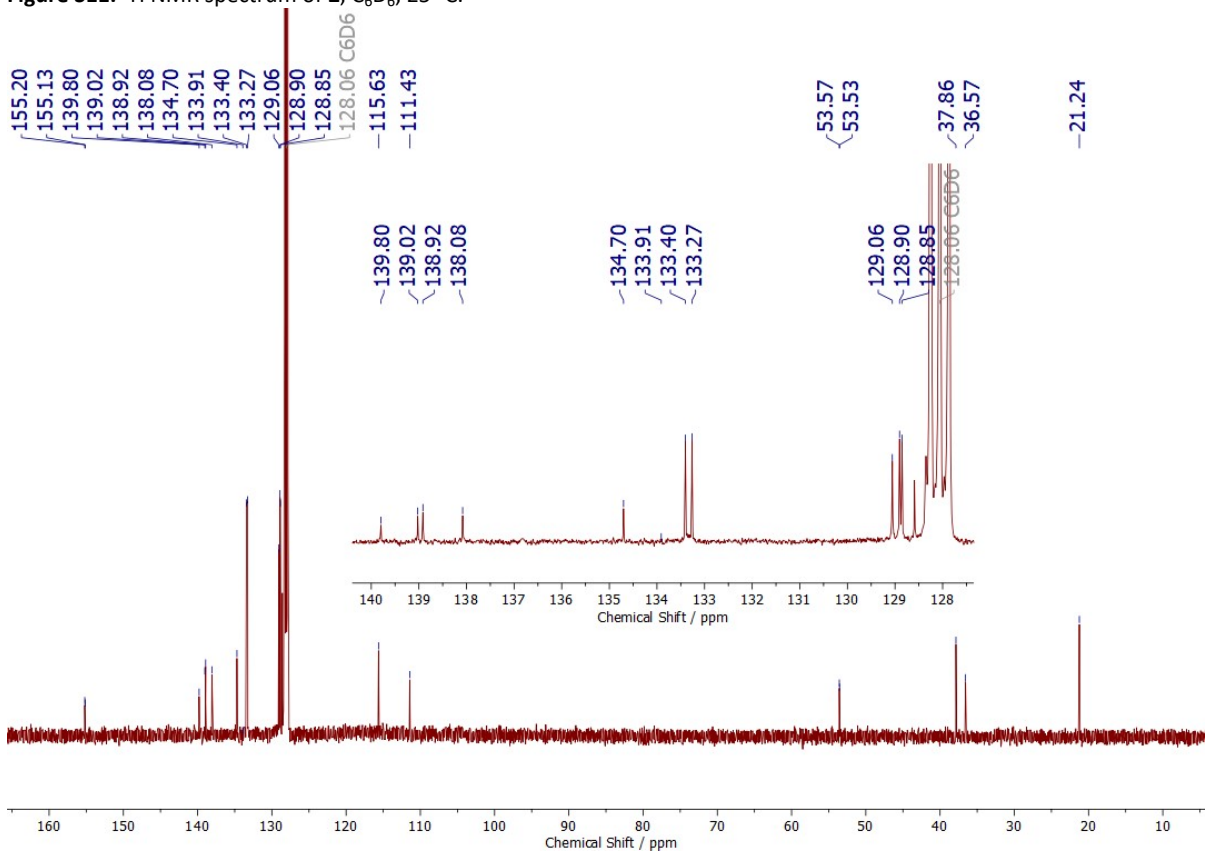

Figure S12.  $^{13}\text{C}\{^1\text{H}\}$  NMR spectrum of **2**,  $\text{C}_6\text{D}_6$ , 25  $^\circ\text{C}$ .

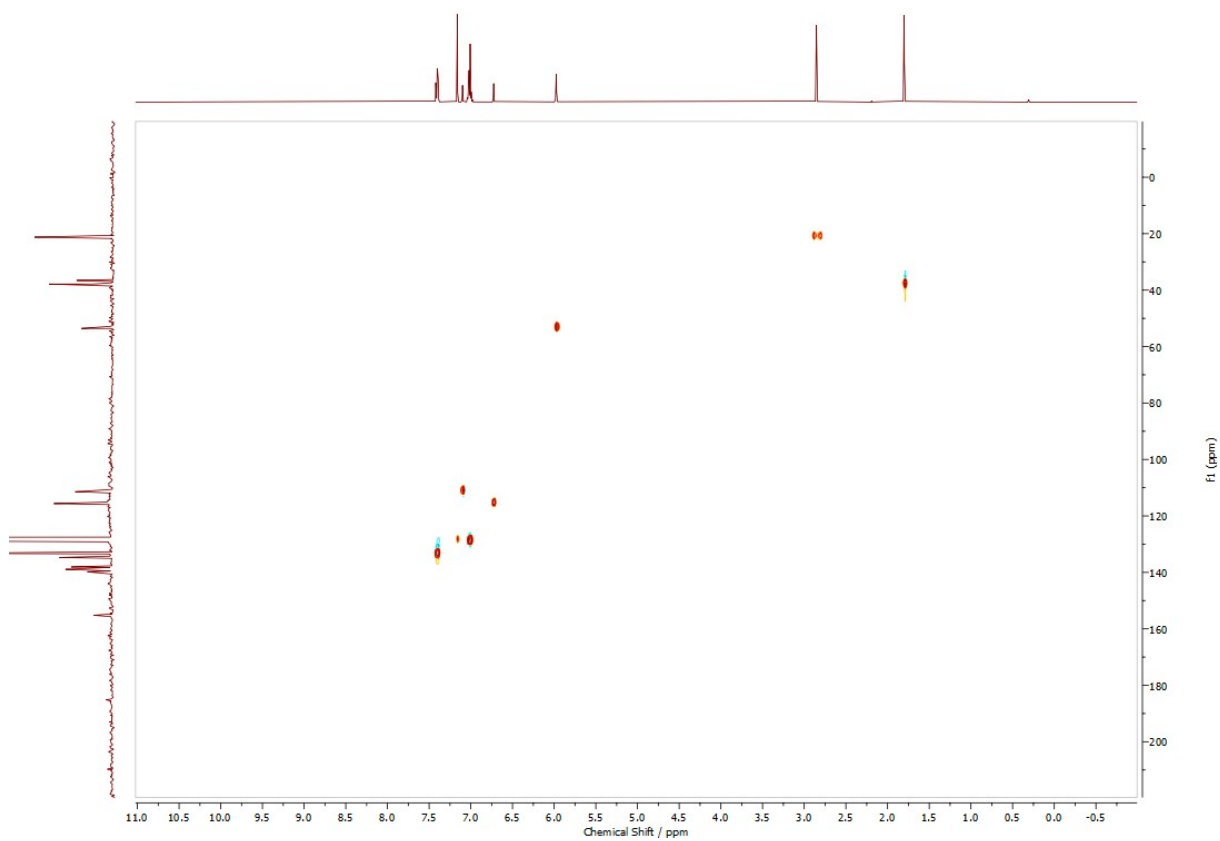

**Figure S13.** HSQC NMR spectrum of **2**, C<sub>6</sub>D<sub>6</sub>, 25 °C.

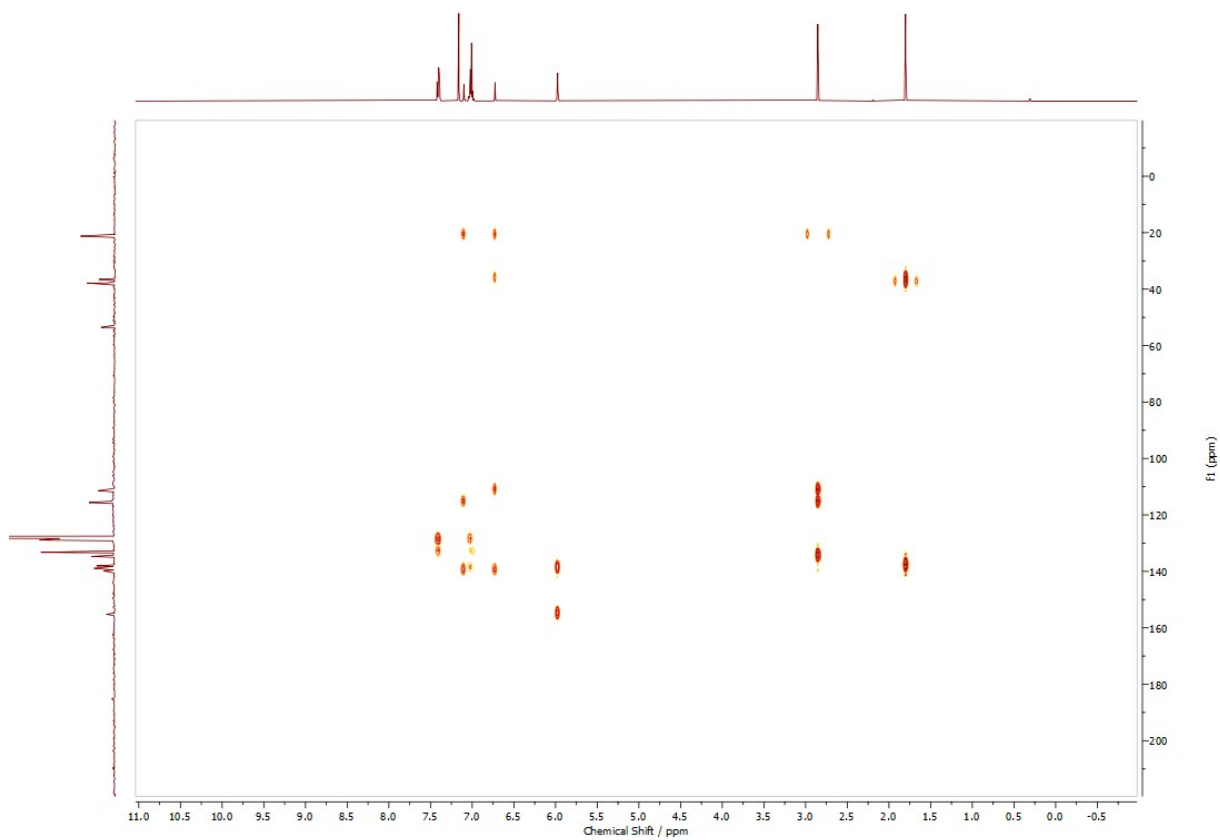

**Figure S14.** HMBC NMR spectrum of **2**, C<sub>6</sub>D<sub>6</sub>, 25 °C.

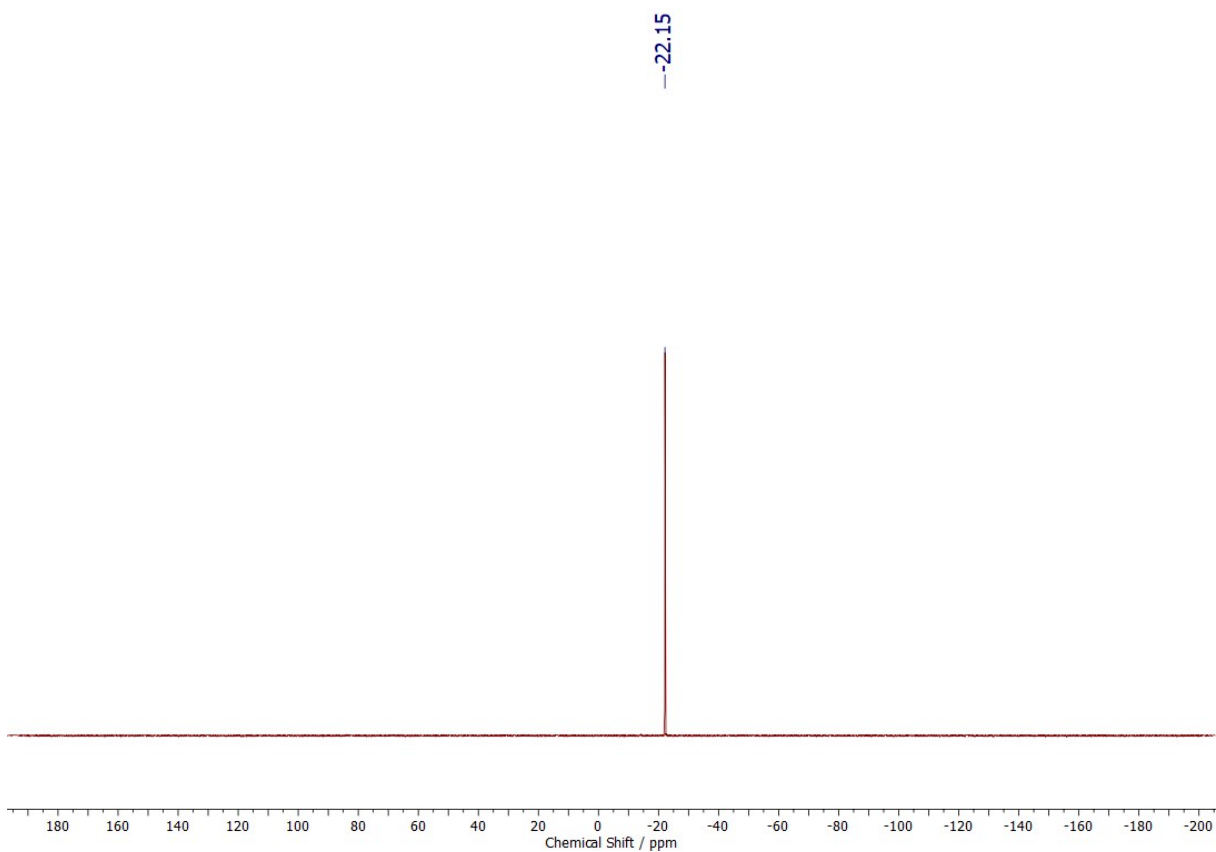

**Figure S15.**  $^{31}\text{P}\{^1\text{H}\}$  NMR spectrum of **2**,  $\text{C}_6\text{D}_6$ , 25 °C

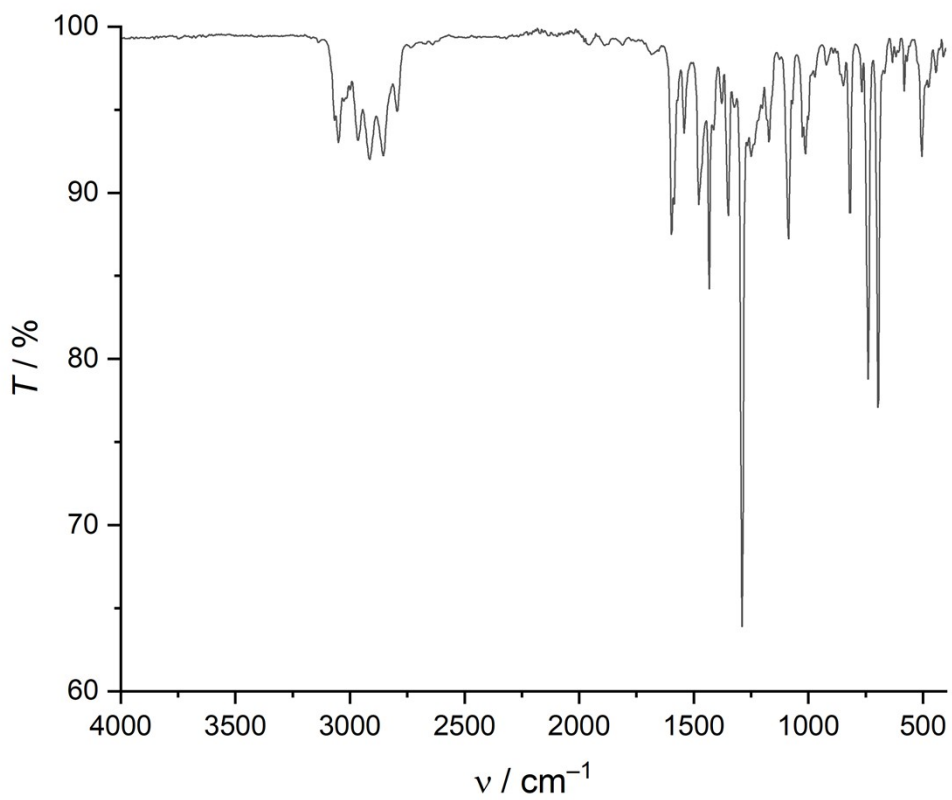

**Figure S16.** ATR-IR spectrum of **2**, solid, 25 °C.

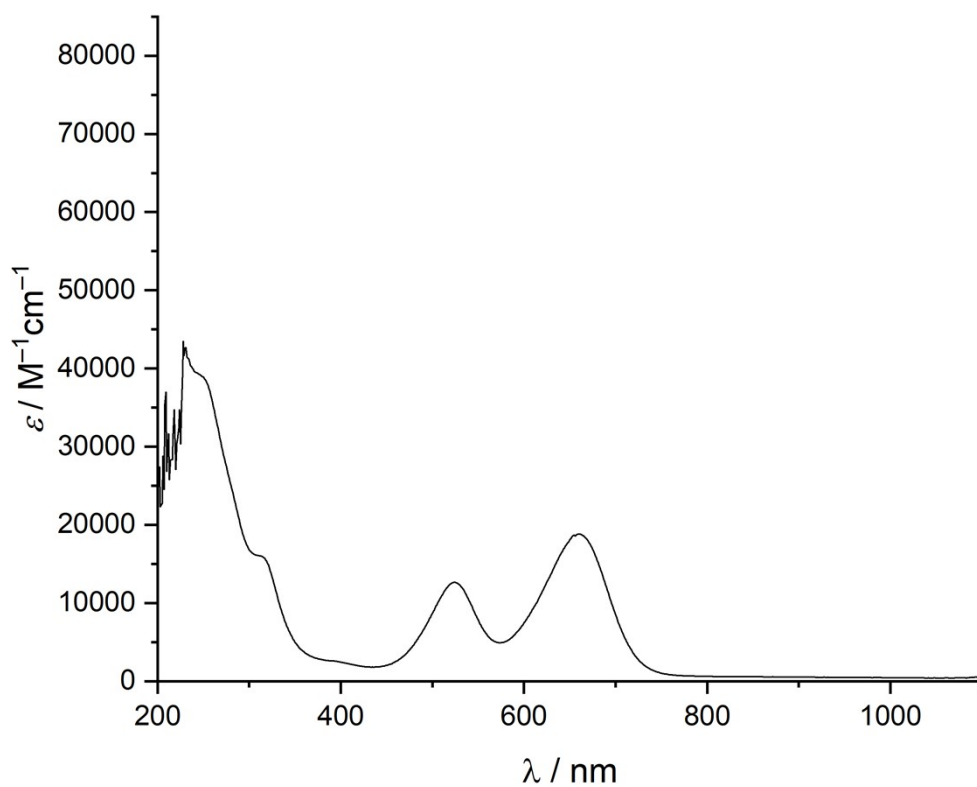

Figure S17. UV/vis spectrum of **2**, DCM, 25 °C.

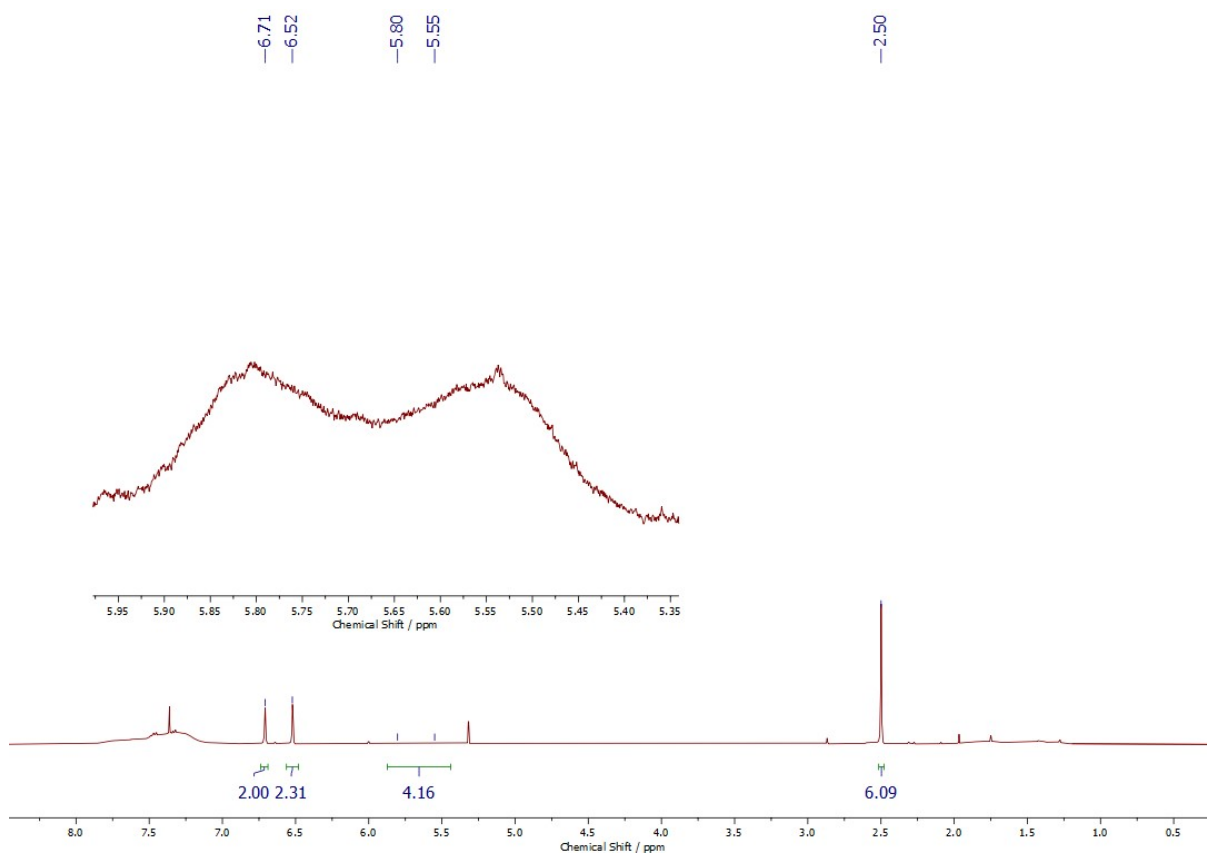

Figure S18.  $^1\text{H}$  NMR spectrum of **3**, DCM, 25 °C; Inset: Zoomed in  $^1\text{H}$  NMR spectrum showing the Inequivalence of the severely broadened ligand's methylene protons.

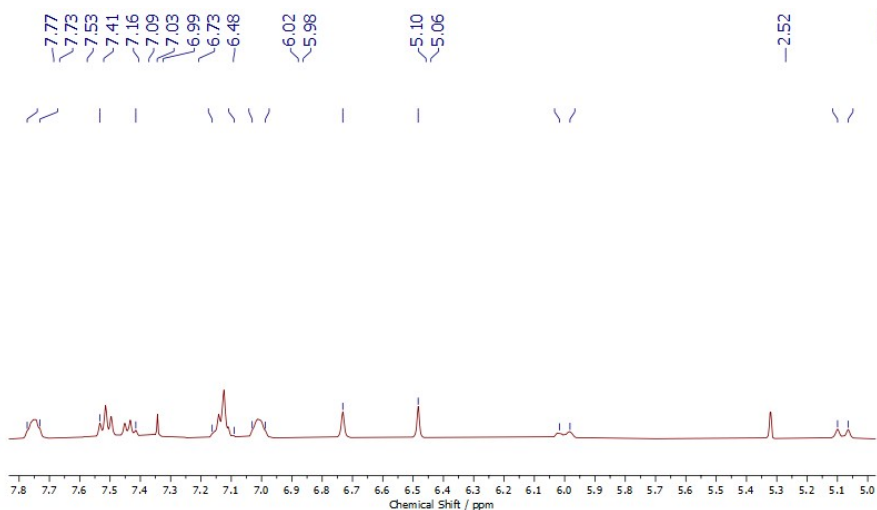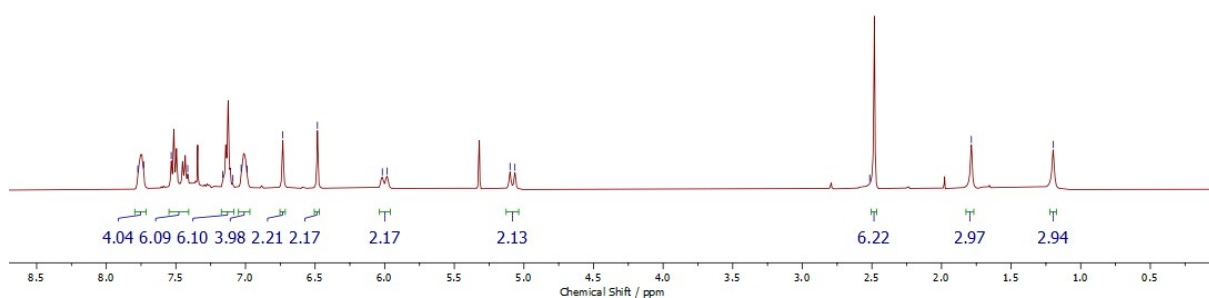

**Figure S19.**  $^1\text{H}$  NMR spectrum of **3**, DCM,  $-60\text{ }^\circ\text{C}$ ; Inset: Aromatic region of the  $^1\text{H}$  NMR spectrum revealing sharpening of the ligand signals.

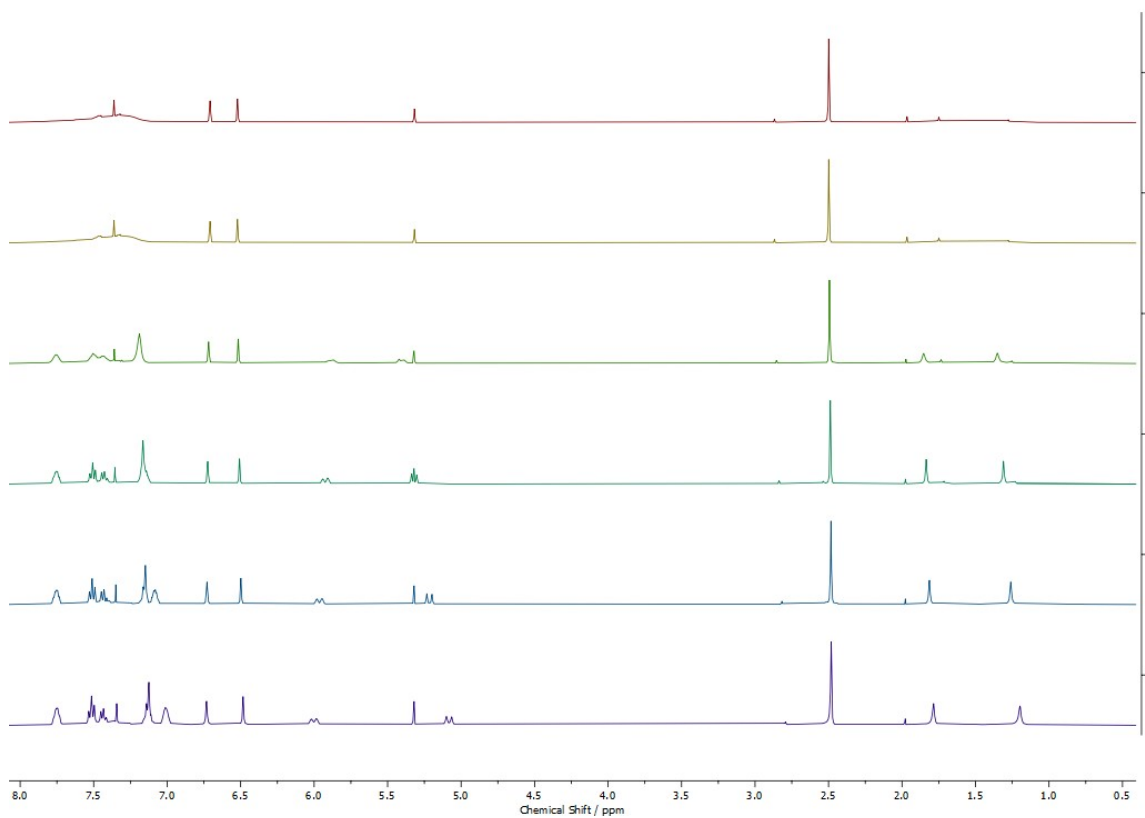

**Figure S20.**  $^1\text{H}$  VT NMR of **3**, DCM,  $25\text{ }^\circ\text{C}$  (red),  $0\text{ }^\circ\text{C}$  (yellow),  $0\text{ }^\circ\text{C}$  (light green),  $-20\text{ }^\circ\text{C}$  (dark green),  $-40\text{ }^\circ\text{C}$  (blue),  $-60\text{ }^\circ\text{C}$  (purple).

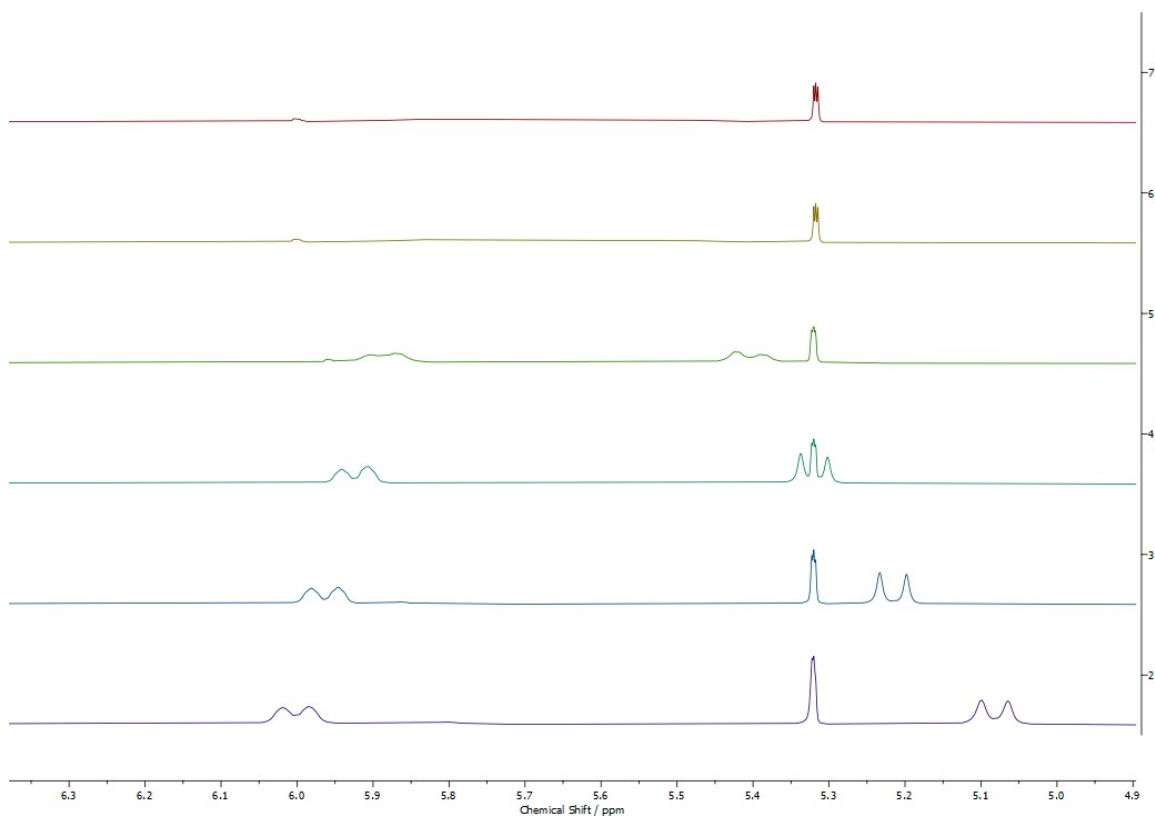

**Figure S21.** Zoomed in  $^1\text{H}$  VT NMR of **3**, DCM, 25 °C (red), 0 °C (yellow), 0 °C (light green), -20 °C (dark green), -40 °C (blue), -60 °C (purple).

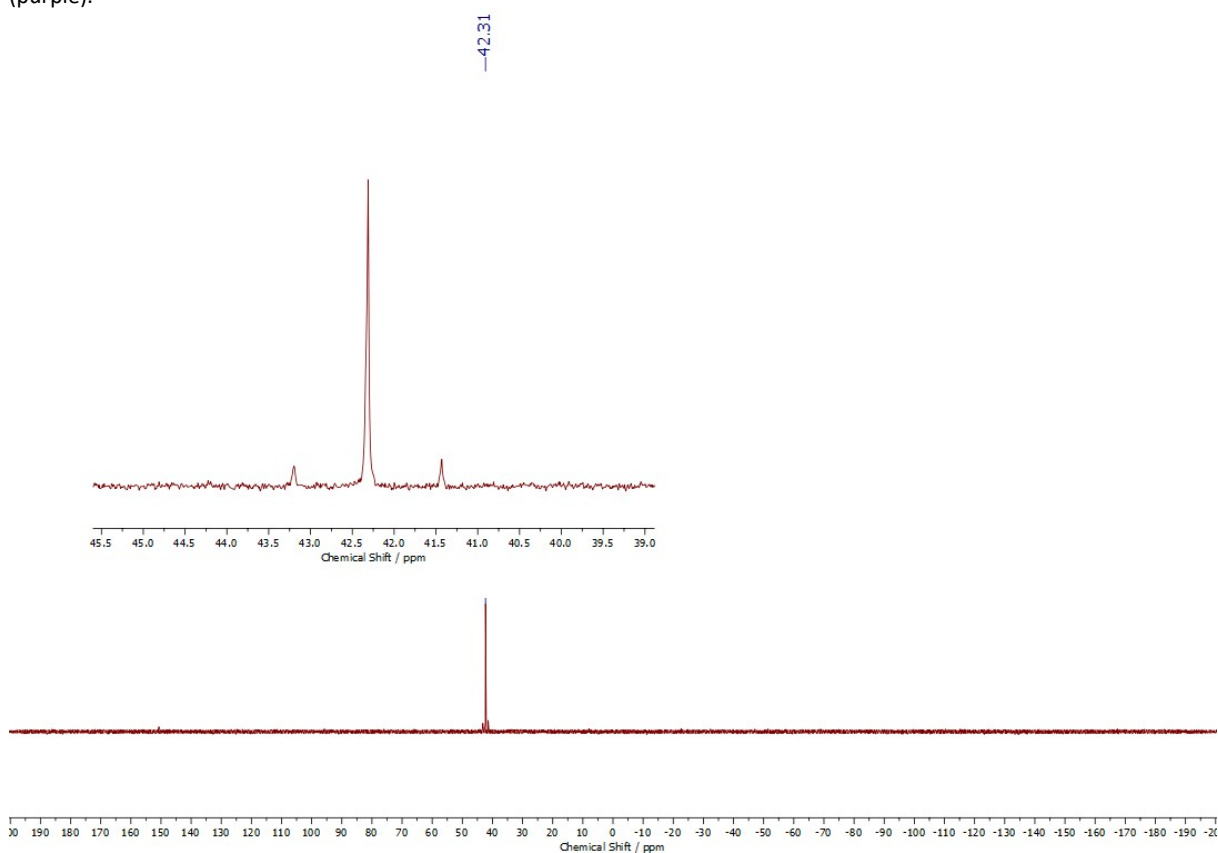

**Figure S22.**  $^{31}\text{P}\{^1\text{H}\}$  NMR of **3**, DCM, 25 °C; Inset: zoomed in  $^{31}\text{P}\{^1\text{H}\}$  NMR spectrum displaying the P-W coupling.

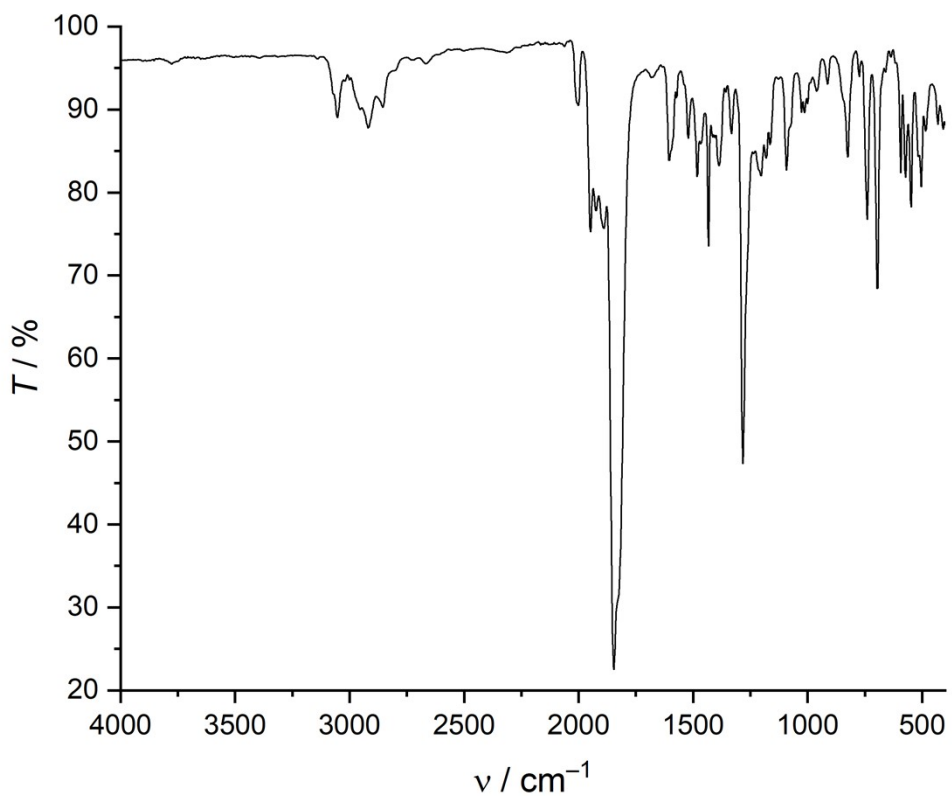

Figure S23. ATR-IR spectrum of **3**, solid, 25 °C.

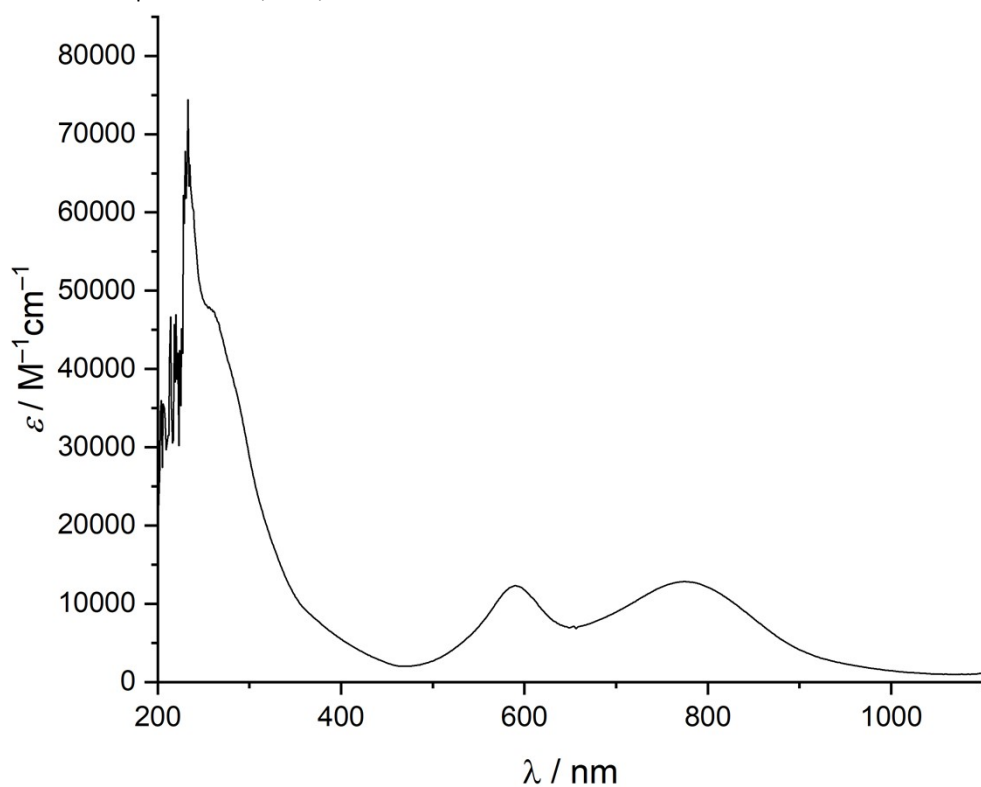

Figure S24. UV/vis spectrum of **3**, DCM, 25 °C.



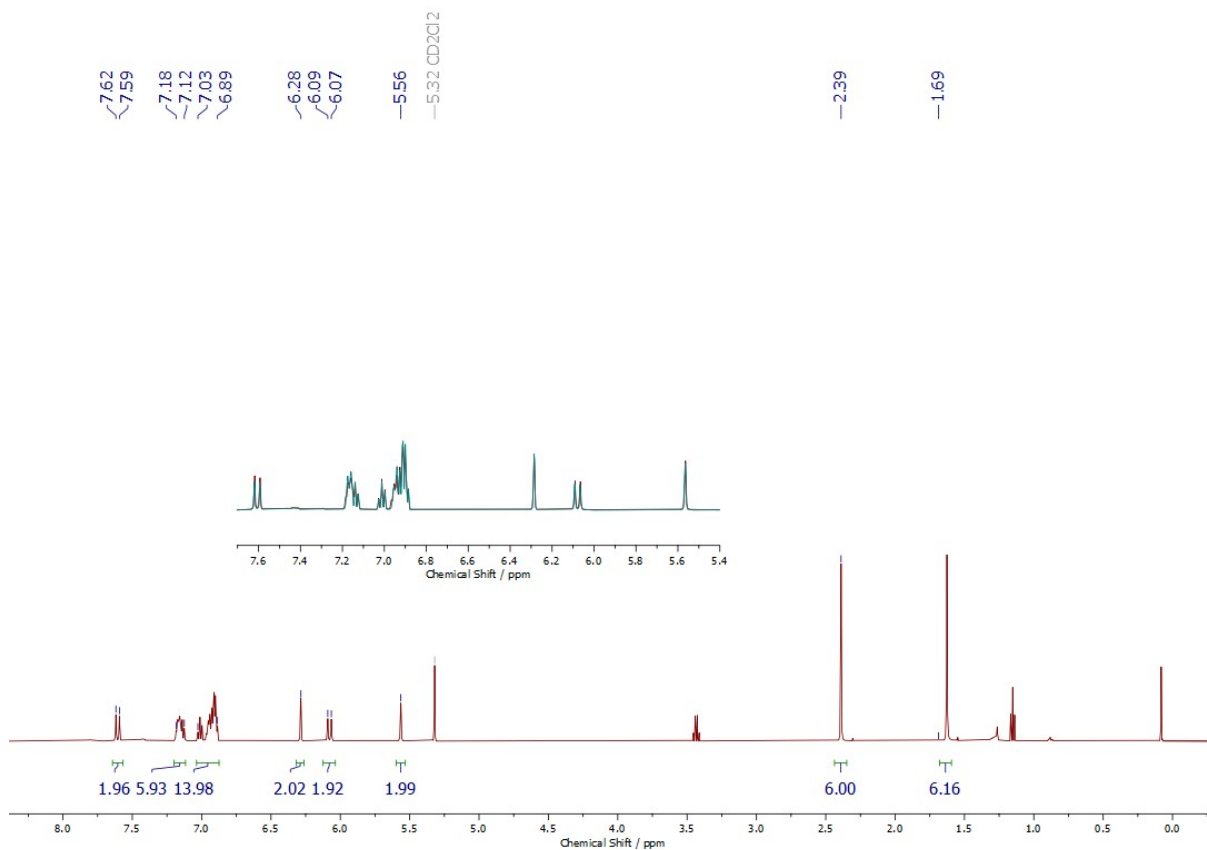

**Figure S25.**  $^1\text{H}$  NMR spectrum of **4**, DCM, 25 °C, unlabeled peaks belong to residual  $\text{Et}_2\text{O}$ /hexane that can be removed via extensive drying and grease present in the deuterated solvent.; Inset:  $^1\text{H}$  and  $^1\text{H}\{^{31}\text{P}\}$  NMR spectrum of the aromatic region.

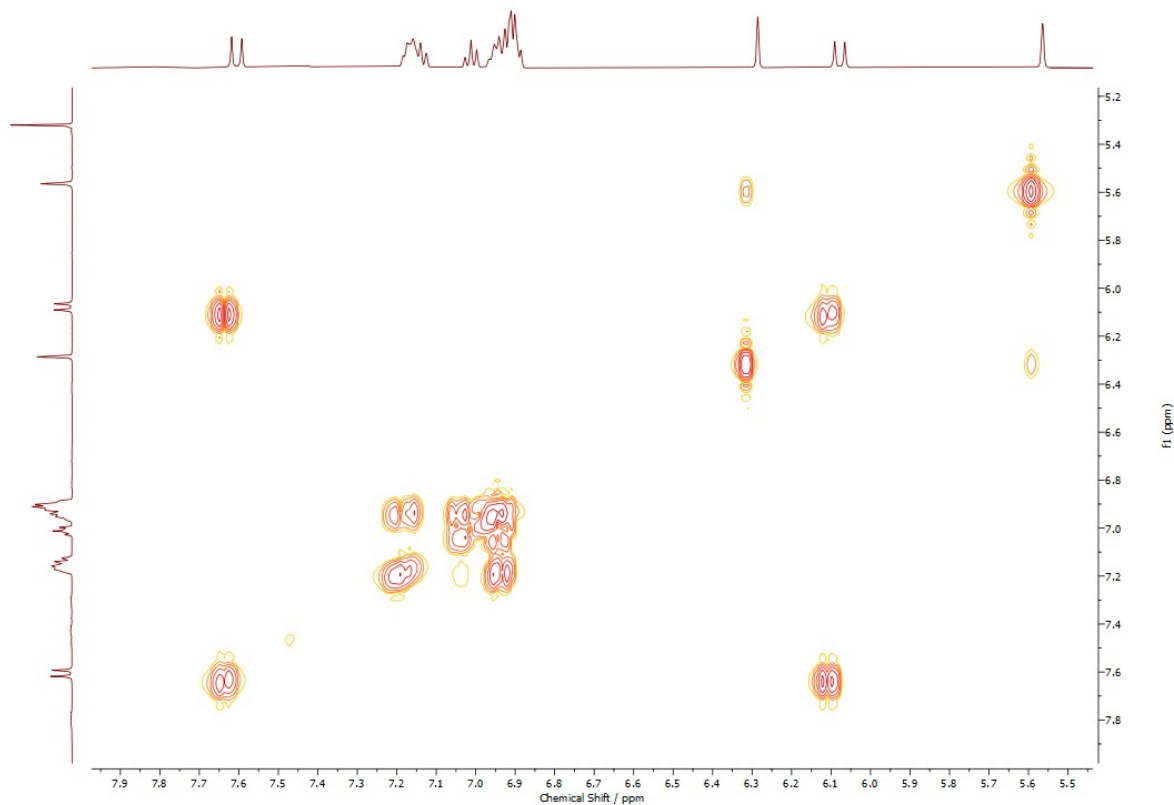

**Figure S26.** COSY NMR spectrum of **4**, DCM, 25 °C.

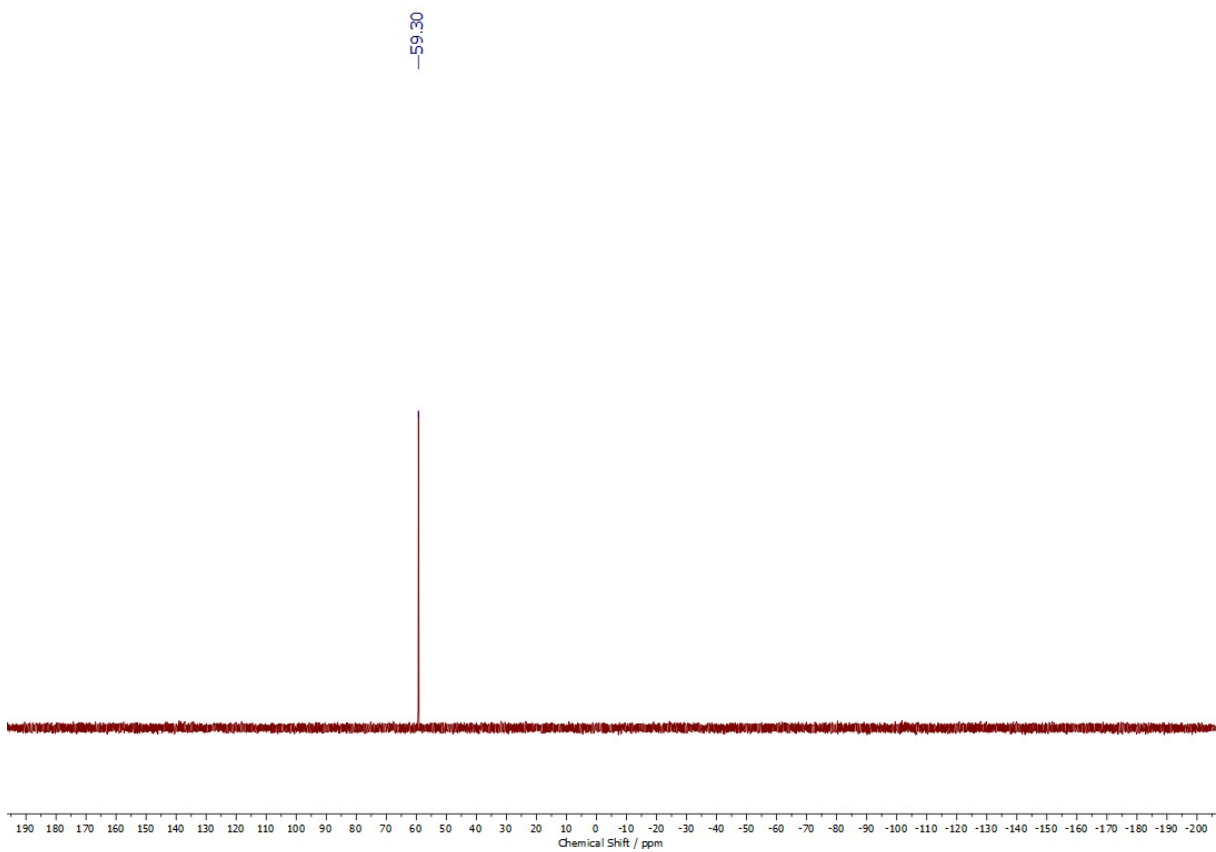

Figure S27.  $^{31}\text{P}\{^1\text{H}\}$  NMR spectrum of **4**, DCM, 25 °C.

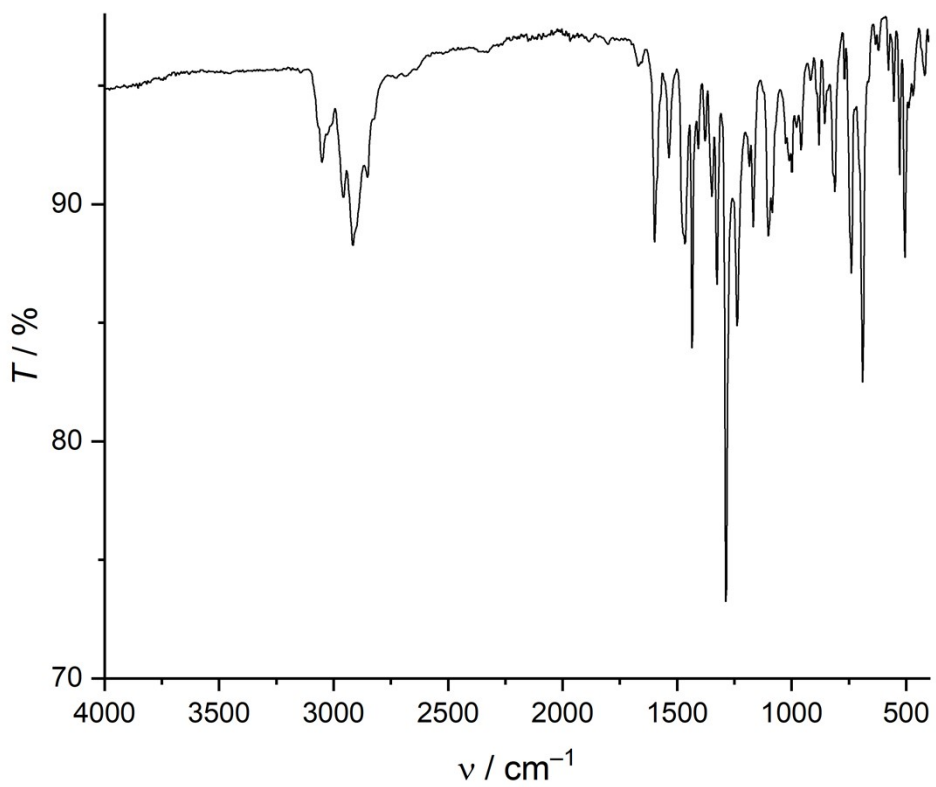

Figure S28. ATR-IR spectrum of **4**, solid, 25 °C.

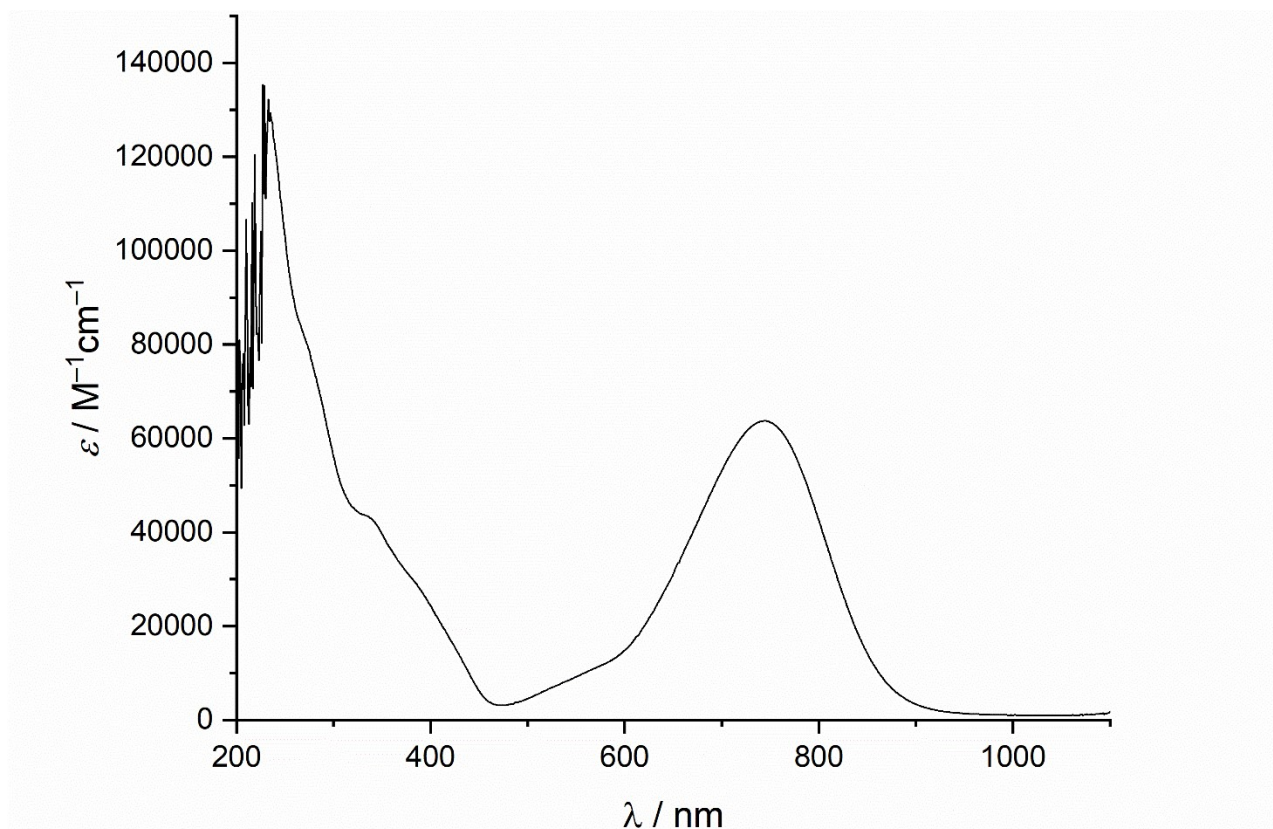

Figure S29. UV/vis spectrum of **4**, DCM, 25 °C.

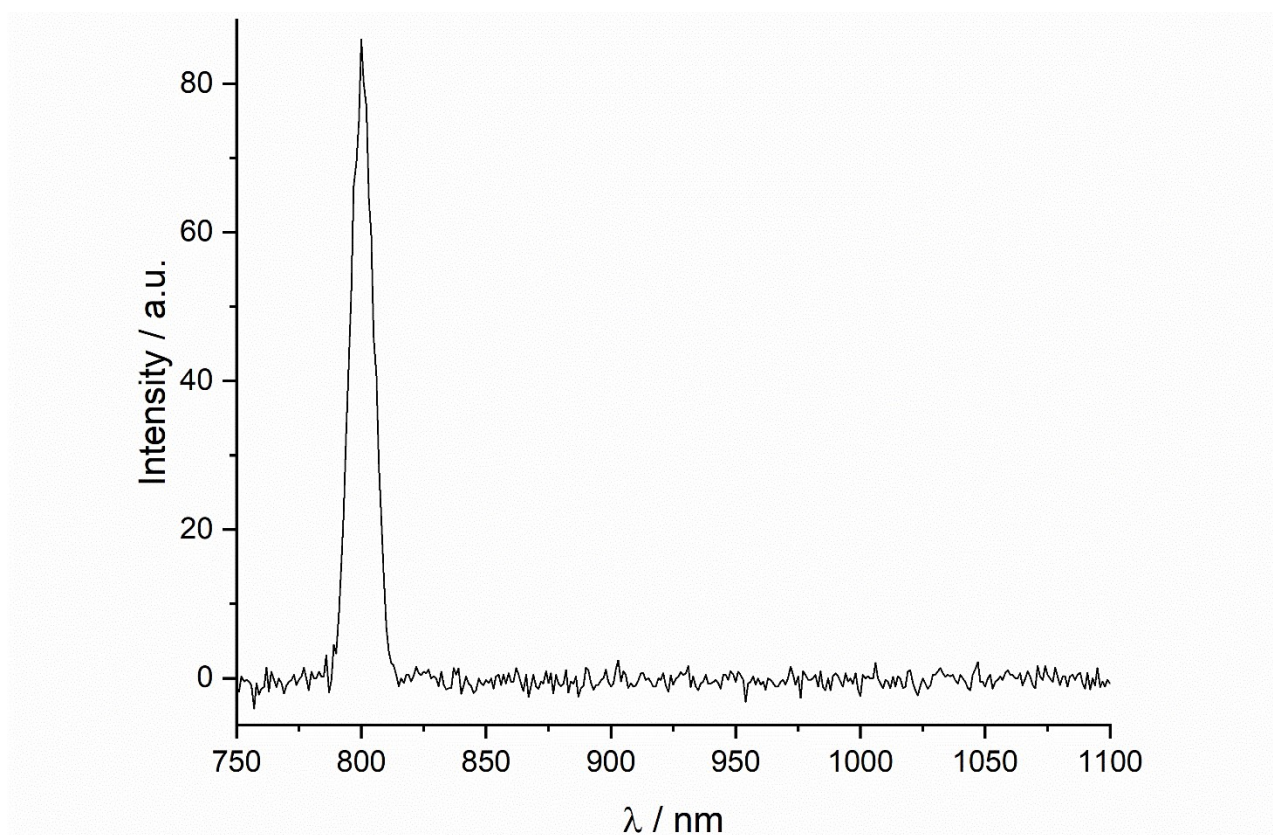

Figure S30. Emission spectrum of **4**,  $10^{-5}$  M, DCM, 25 °C,  $\lambda_{\text{ex}} = 800$  nm; no detectable fluorescence and only reflection was detected.

DOSY NMR Studies

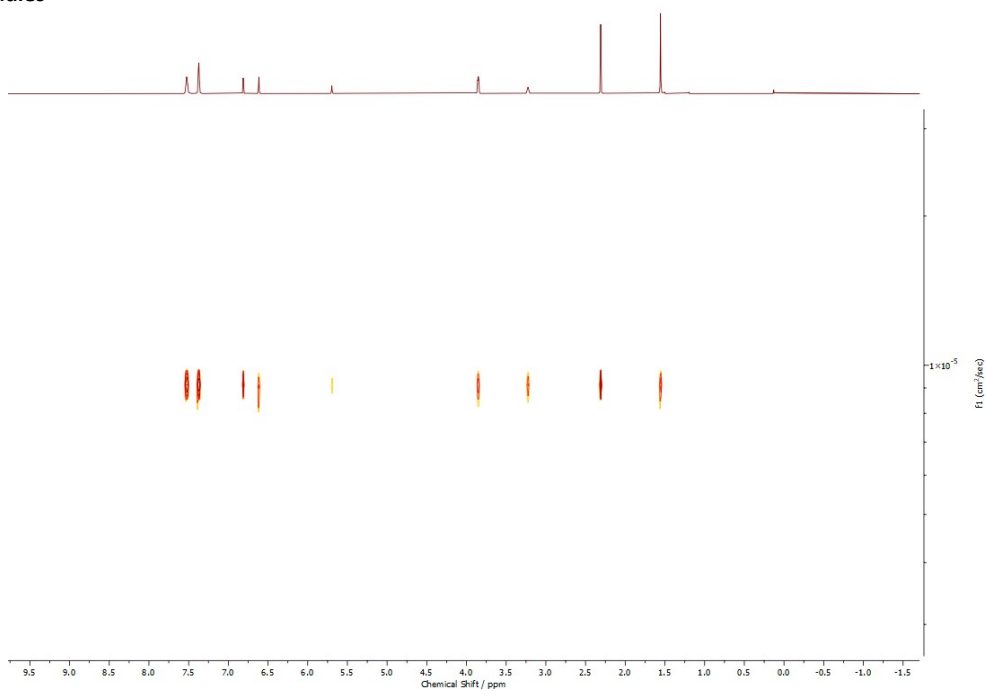

Figure S31. DOSY NMR of **1**, DCM, 25 °C.

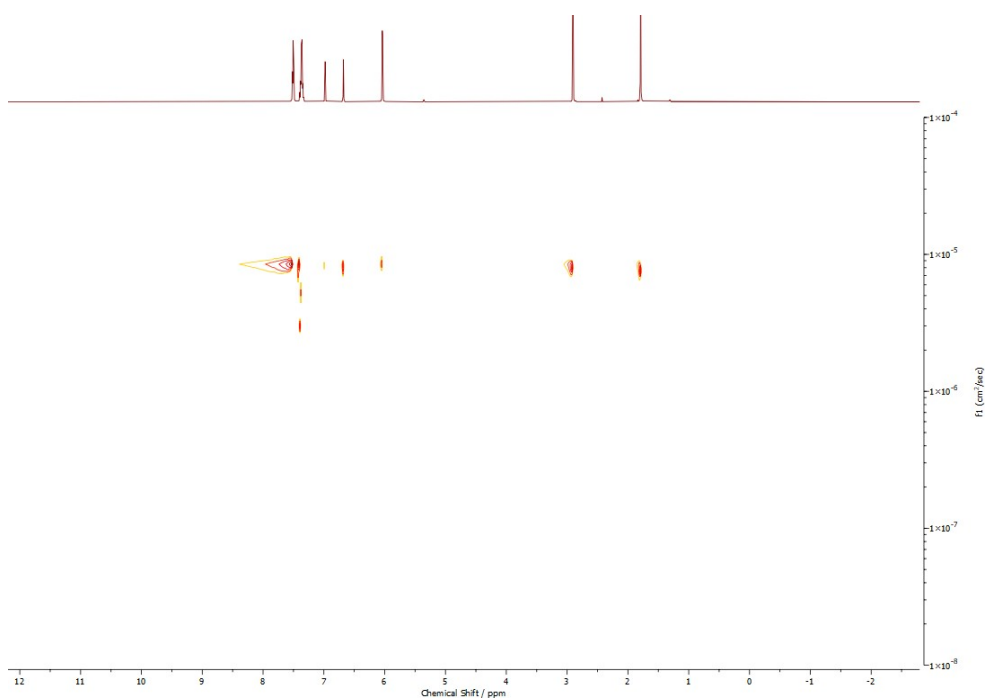

Figure S32. DOSY NMR of **2**, DCM, 25 °C.

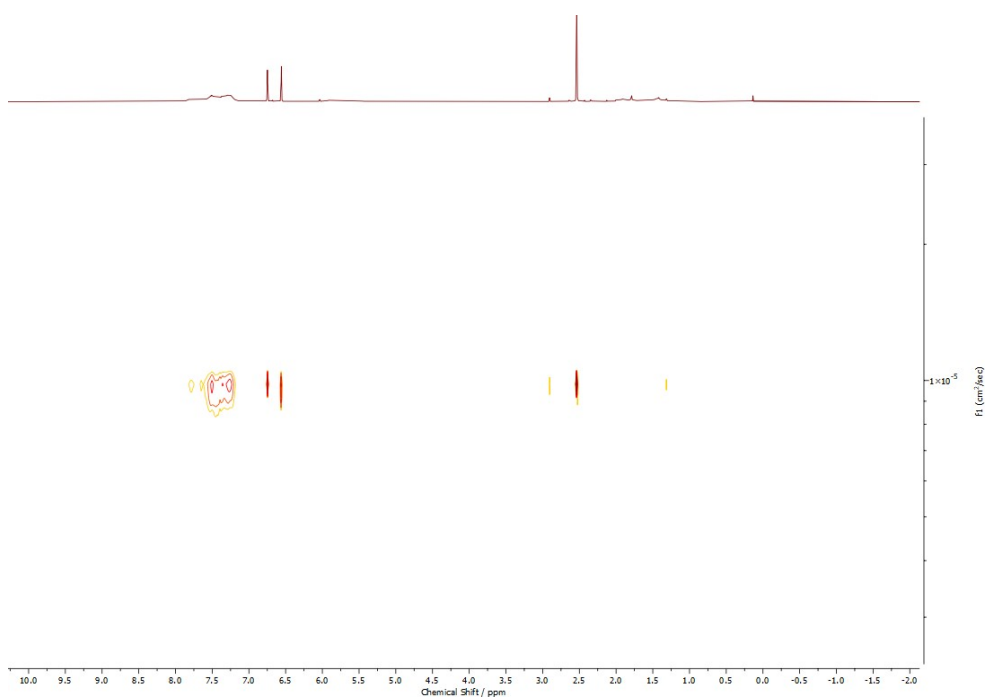

**Figure S33.** DOSY NMR of **3**, DCM, 25 °C.

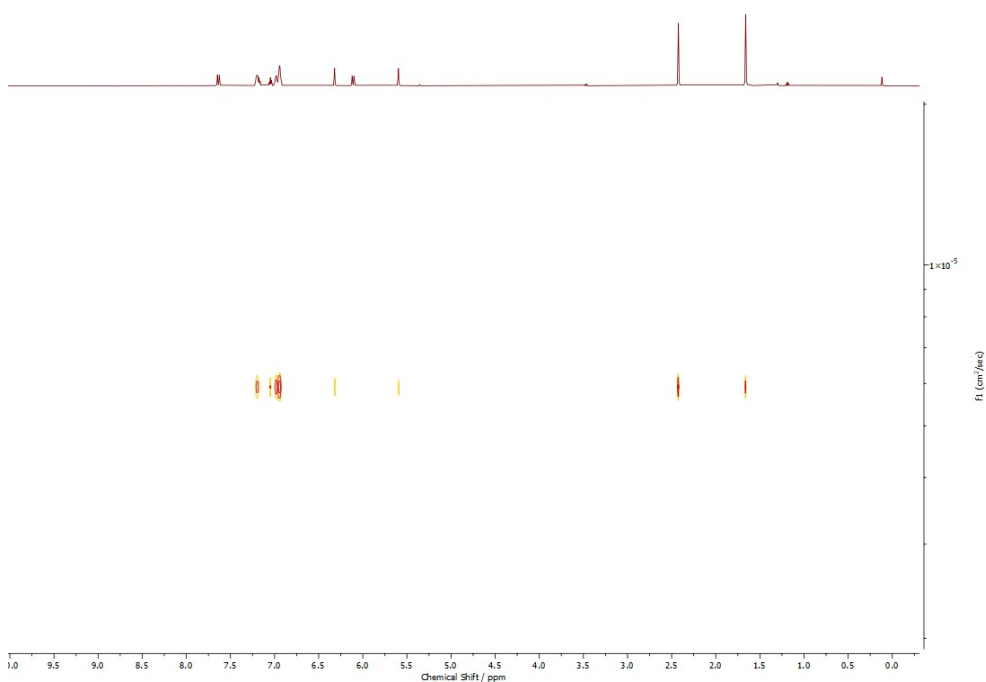

**Figure S34.** DOSY NMR of **4**, DCM, 25 °C.

**Table S1.** Diffusion coefficients derived from DOSY NMR.

| Compound | Diffusion coefficient ( $10^{-6} \text{ cm}^2/\text{s}$ ) |
|----------|-----------------------------------------------------------|
| <b>1</b> | 9.0                                                       |
| <b>2</b> | 8.1                                                       |
| <b>3</b> | 10                                                        |
| <b>4</b> | 5.8                                                       |

Application of the Stokes-Einstein equation shows that **4**'s radius is 1.7 times larger than **3**'s in solution ( $D_1/D_2 = r_2/r_1$ ). In combination with the observed  $C_{2v}$  symmetry on the NMR timescale the connectivity of **4** revealed by SCXRD appears to also be present in solution.

### Determination of Lewis-acidities via the Gutmann-Beckett method

The Lewis acidity of **2** and **3** was assessed via addition of one equivalent of Et<sub>3</sub>PO and Me<sub>3</sub>PS to a dichloromethane solution of the respective complexes including a capillary of PPh<sub>3</sub> as an internal standard. The acceptor number was derived via application of the following formulas:<sup>57,59</sup>

$$\text{AN}(\text{Et}_3\text{PO}) = 2.21 \cdot (\delta(^{31}\text{P NMR})_{\text{Sample}}/\text{ppm} - 41.0)$$

$$\text{AN}(\text{Me}_3\text{PS}) = 6.41 \cdot (\delta(^{31}\text{P NMR})_{\text{Sample}}/\text{ppm} - 29.2)$$

For both species an AN(Et<sub>3</sub>PO) of 20 was obtained which represents an upper limit since the Lewis acidity of dichloromethane is 20.4. **2** and **3** both feature an AN(Me<sub>3</sub>PS) of 8 rendering them weakly Lewis-acidic in line with computed FIAs.

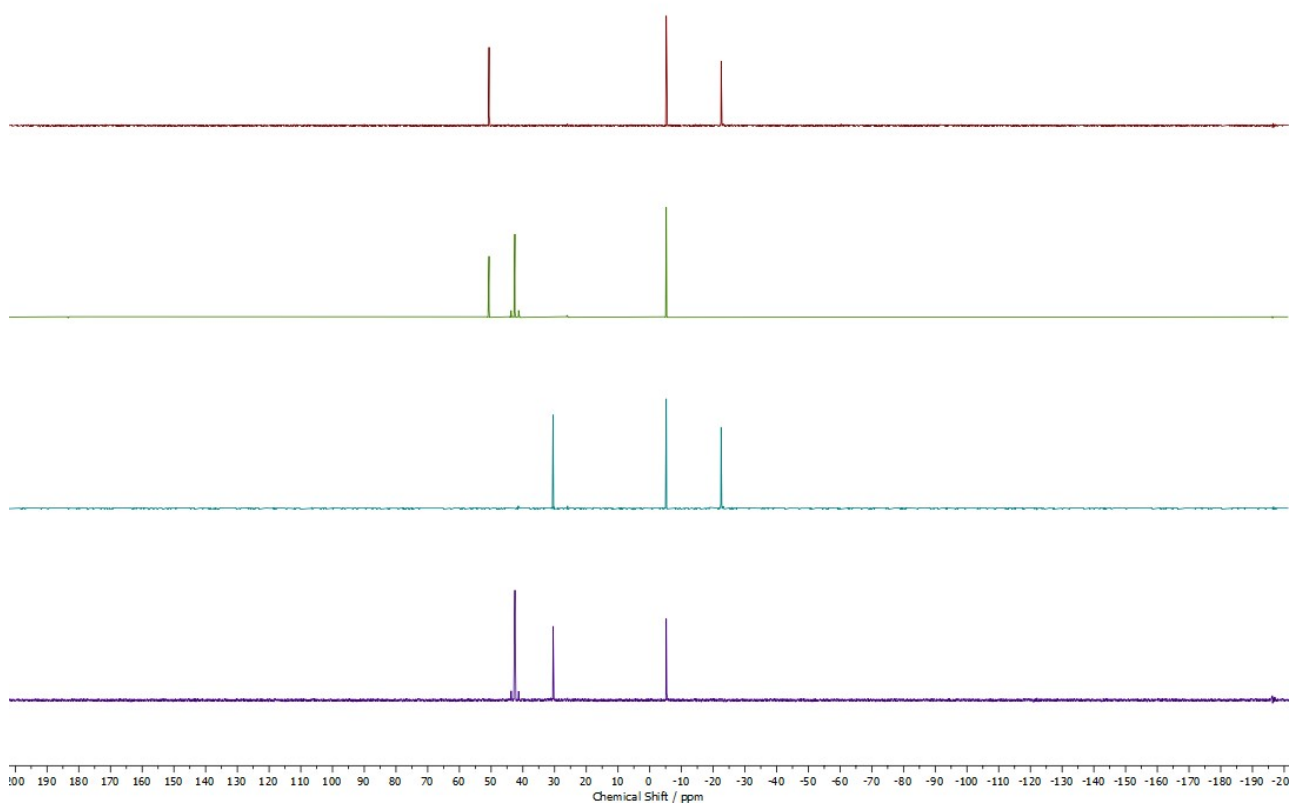

**Figure S35.** <sup>31</sup>P{<sup>1</sup>H} NMR spectra of **2** (red) and **3** (green) in the presence of one equivalent of Et<sub>3</sub>PO; <sup>31</sup>P{<sup>1</sup>H} NMR spectra of **2** (teal) and **3** (purple) in the presence of one equivalent of Me<sub>3</sub>PS, DCM, 25 °C, PPh<sub>3</sub> capillary as internal standard.



## Cyclic voltammetry

**2** features undefined, irreversible oxidative events on the cyclic voltammogram that are accompanied by rapid fouling of the glassy carbon electrode. To partially prevent this, **2** was measured with ferrocene present in solution providing an internal reference during measurement to prevent overoxidation of **2**. Nevertheless, significant electrode fouling was observed as indicated by the loss of the ferrocene/ferrocenium reverse peak and increasing loss of resolution. After ca. 6 measurements no defined peaks were observable anymore.

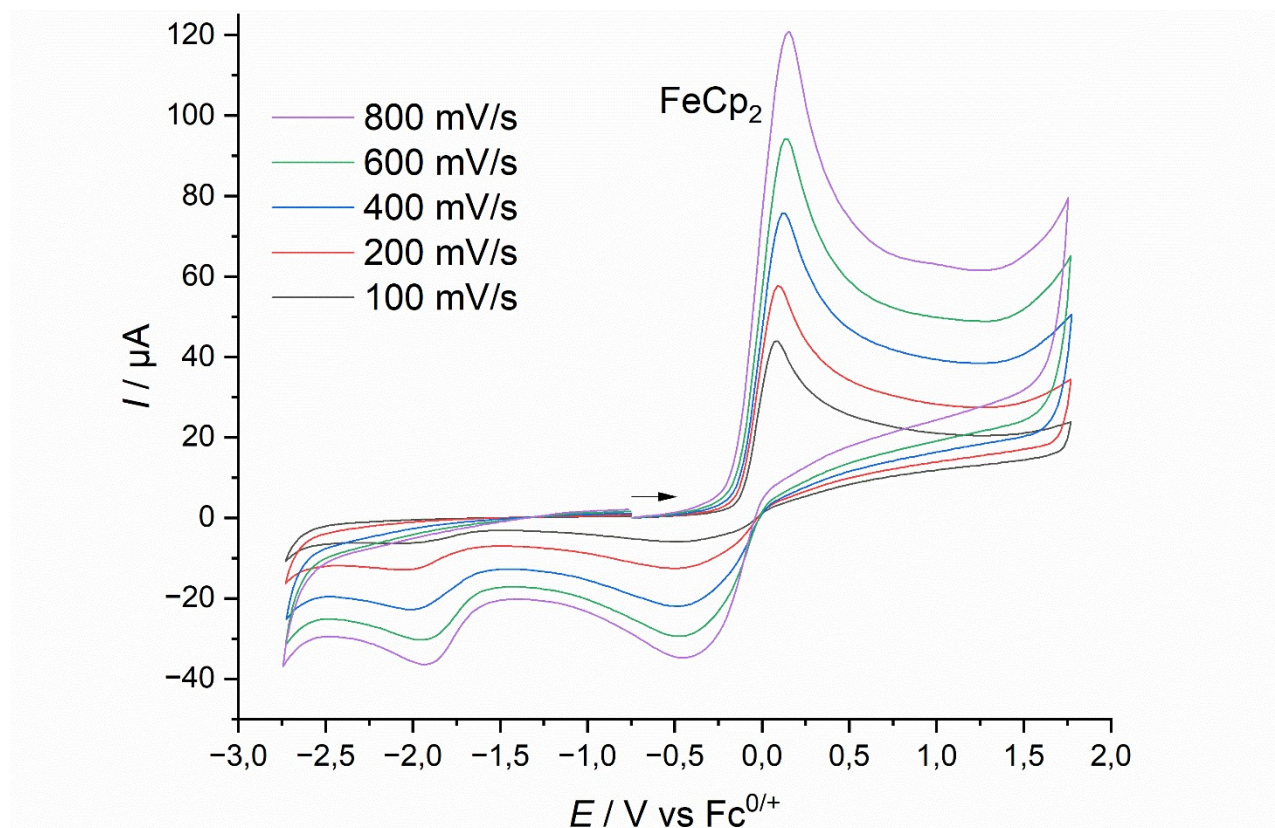

Figure S36. CV of **2** in DCM, 0.1 M  $[\text{NBu}_4][\text{PF}_6]$ , 1 mM **2**, 3 mM ferrocene, 25 °C.

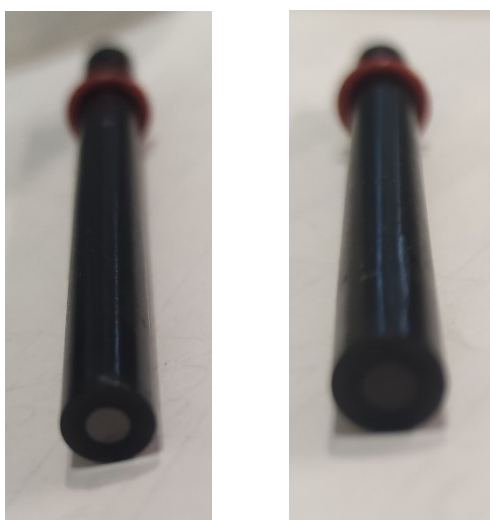

Figure S37. GC working electrode before (left) and after the measurement (right).

Since the measurement in DCM indicates that **2** might feature a reductive wave an additional CV was recorded in THF. Decamethylferrocene was present in solution to prevent fouling of the electrode by accidentally scanning towards high potentials in the absence of an internal reference. A pseudo-reversible reductive event was detected at  $E_{1/2} = -1.98$  V vs  $\text{Fc}^{0/+}$ .

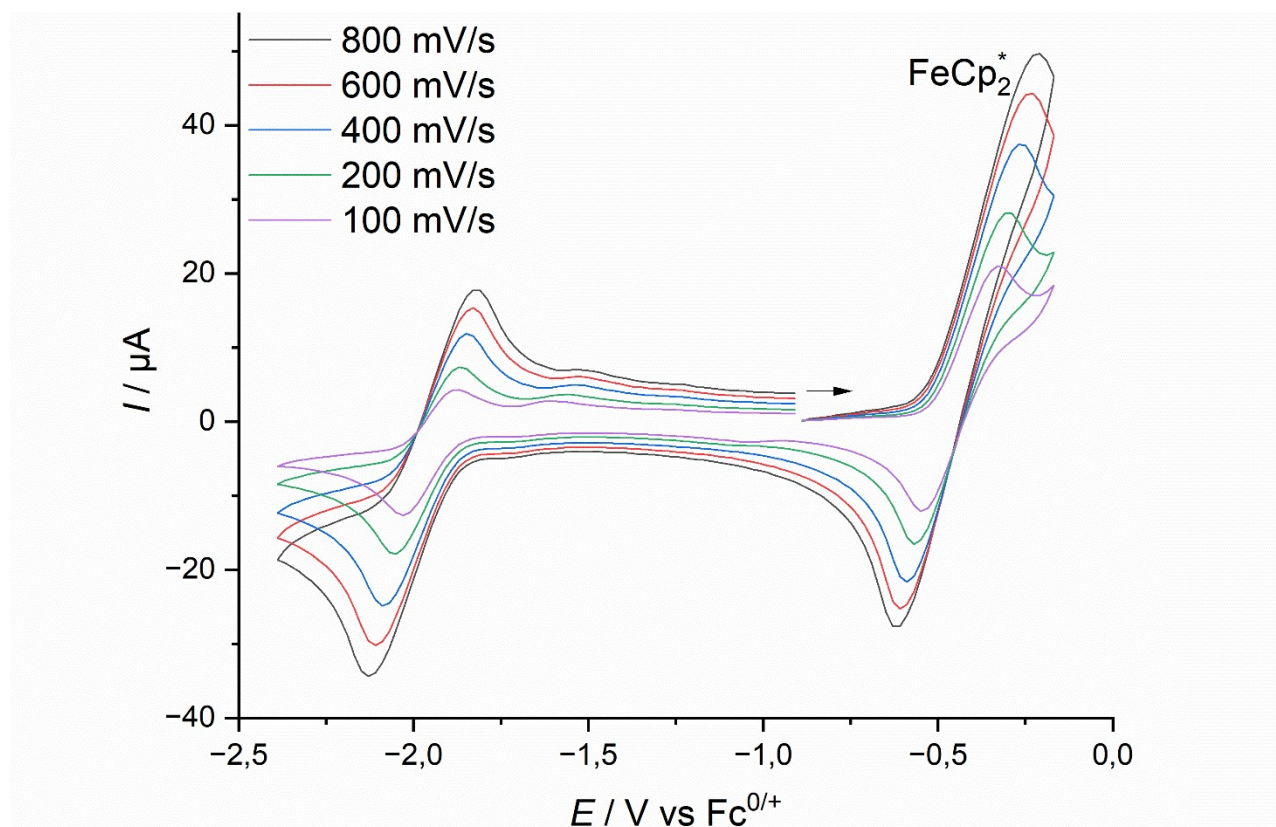

Figure S38. CV of **2** in THF, 0.1 M  $[\text{NBu}_4][\text{PF}_6]$ , 1 mM **2**, 1 mM decamethylferrocene, 25 °C.



The cyclic voltammograms of **3** could be recorded without the need of adding an internal reference before addition of **3**. A quasi-reversible reductive event at  $E_{1/2} = -1.39$  V vs  $\text{Fc}^{0/+}$  and an irreversible oxidative event at  $E \approx -0.2$  V vs  $\text{Fc}^{0/+}$  were recorded. After the measurement ferrocene was added to reference the displayed spectrum.

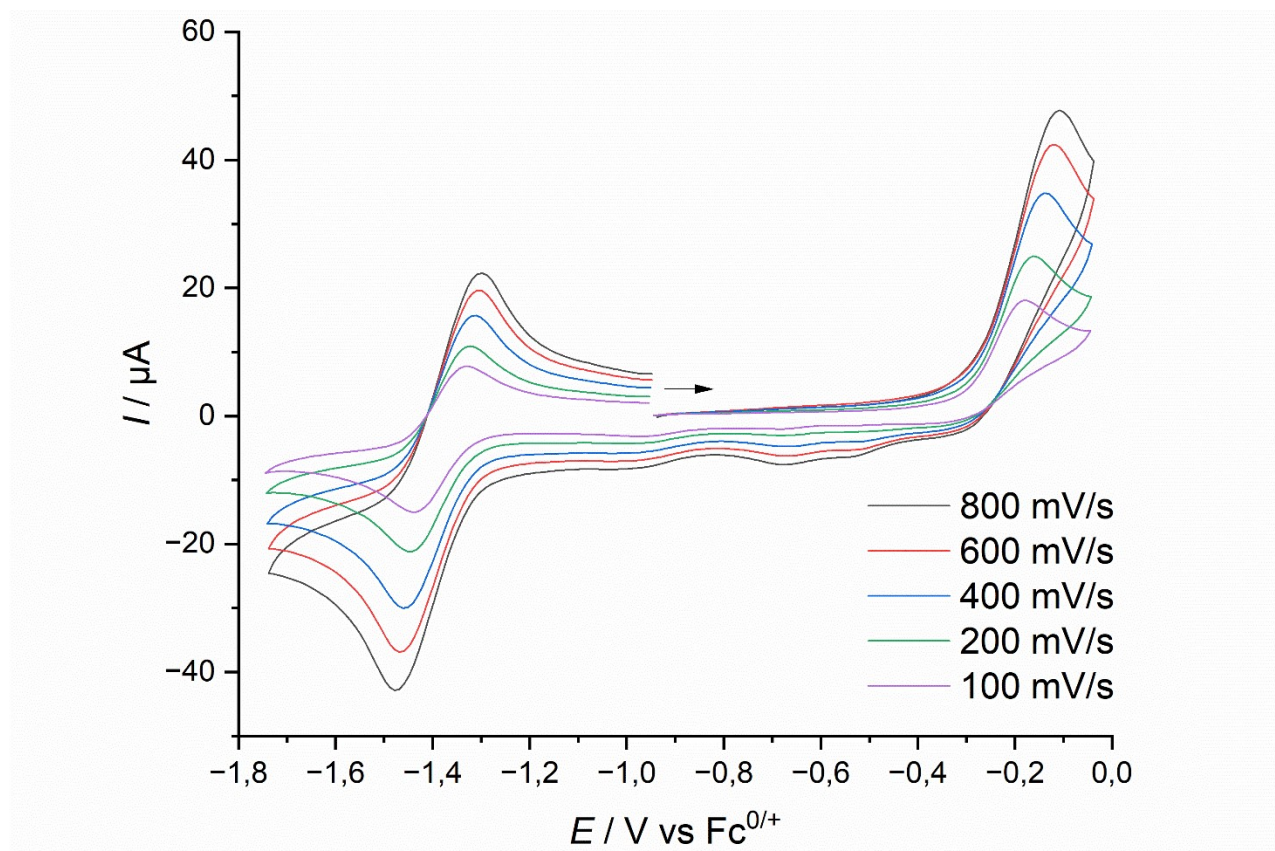

Figure S39. CV of **3** in DCM, 0.1 M  $[\text{NBu}_4][\text{PF}_6]$ , 1 mM **3**, 25 °C.

## Single Crystal X-ray Diffraction

### Crystallographic Details of 1

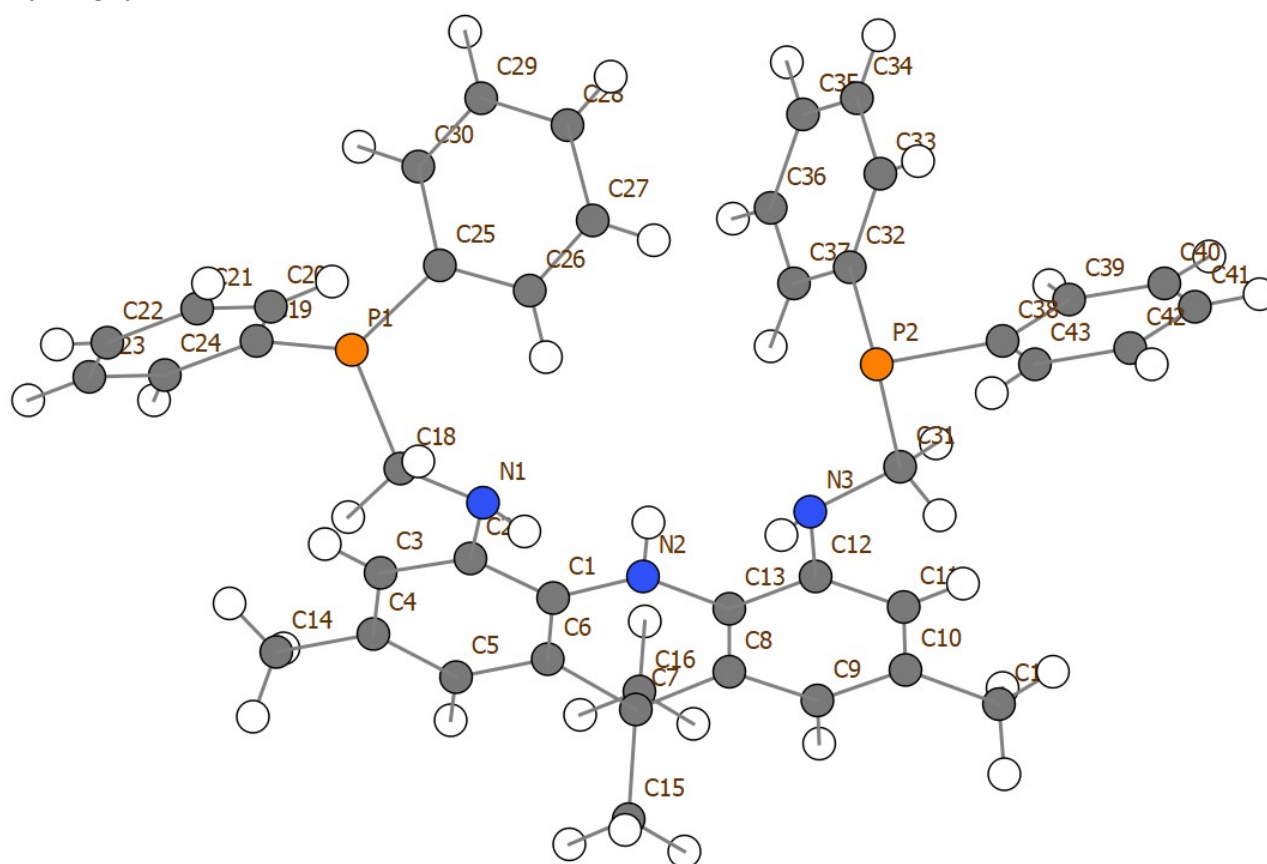

A clear colourless, block-shaped crystal of mo\_ja23\_117\_0m\_a (1) was mounted on a MiTeGen micromount with perfluoroether oil. Data were collected from a shock-cooled single crystal at 100.0 K on a Bruker D8 VENTURE dual wavelength Mo/Cu three-circle diffractometer with a microfocus sealed X-ray tube using a mirror optics as monochromator and a Bruker PHOTON III detector. The diffractometer was equipped with an Oxford Cryostream 800 low temperature device and used  $\text{MoK}\alpha$  radiation ( $\lambda = 0.71073 \text{ \AA}$ ). All data were integrated with SAINT and a multi-scan absorption correction using SADABS was applied.<sup>[S2,S3]</sup> The structure was solved by iterative methods using olex2.solve and refined by full-matrix least-squares methods against  $F^2$  by olex2.refine using Olex2.<sup>[S4]</sup> All non-hydrogen atoms were refined with anisotropic displacement parameters. All hydrogen atoms were refined with isotropic displacement parameters. Some were refined freely and some on calculated positions using a riding model with their  $U_{\text{iso}}$  values constrained to 1.5 times the  $U_{\text{eq}}$  of their pivot atoms for terminal  $\text{sp}^3$  carbon atoms and 1.2 times for all other carbon atoms. Crystallographic data for the structures reported here have been deposited with the Cambridge Crystallographic Data Centre. CCDC 2320292 contain the supplementary crystallographic data for this paper.<sup>[S5]</sup> These data can be obtained free of charge from The Cambridge Crystallographic Data Centre via [www.ccdc.cam.ac.uk/structures](http://www.ccdc.cam.ac.uk/structures). This report was generated using FinalCif.<sup>[S6]</sup>

**Table S2.** Crystal data and structure refinement for **1**.

|                                              |                                                                      |                                          |                 |
|----------------------------------------------|----------------------------------------------------------------------|------------------------------------------|-----------------|
|                                              |                                                                      | [all data]                               | $wR_2 = 0.1069$ |
| CCDC number                                  | 2320292                                                              | Largest peak/hole [ $e\text{\AA}^{-3}$ ] | 0.90/-0.46      |
| Empirical formula                            | $C_{43}H_{43}N_3P_2$                                                 |                                          |                 |
| Formula weight                               | 663.74                                                               |                                          |                 |
| Temperature [K]                              | 100.0                                                                |                                          |                 |
| Crystal system                               | monoclinic                                                           |                                          |                 |
| Space group (number)                         | $P2_1/n$ (14)                                                        |                                          |                 |
| $a$ [ $\text{\AA}$ ]                         | 12.4142(13)                                                          |                                          |                 |
| $b$ [ $\text{\AA}$ ]                         | 15.1667(13)                                                          |                                          |                 |
| $c$ [ $\text{\AA}$ ]                         | 18.9994(18)                                                          |                                          |                 |
| $\alpha$ [ $^\circ$ ]                        | 90                                                                   |                                          |                 |
| $\beta$ [ $^\circ$ ]                         | 92.258(4)                                                            |                                          |                 |
| $\gamma$ [ $^\circ$ ]                        | 90                                                                   |                                          |                 |
| Volume [ $\text{\AA}^3$ ]                    | 3574.5(6)                                                            |                                          |                 |
| $Z$                                          | 4                                                                    |                                          |                 |
| $\rho_{\text{calc}}$ [ $\text{gcm}^{-3}$ ]   | 1.233                                                                |                                          |                 |
| $\mu$ [ $\text{mm}^{-1}$ ]                   | 0.157                                                                |                                          |                 |
| $F(000)$                                     | 1408                                                                 |                                          |                 |
| Crystal size [ $\text{mm}^3$ ]               | 0.28×0.18×0.15                                                       |                                          |                 |
| Crystal colour                               | clear colourless                                                     |                                          |                 |
| Crystal shape                                | block                                                                |                                          |                 |
| Radiation                                    | $\text{MoK}\alpha$ ( $\lambda=0.71073$ $\text{\AA}$ )                |                                          |                 |
| $2\theta$ range [ $^\circ$ ]                 | 4.24 to 61.12 (0.70 $\text{\AA}$ )                                   |                                          |                 |
| Index ranges                                 | $-17 \leq h \leq 17$<br>$-21 \leq k \leq 21$<br>$-27 \leq l \leq 27$ |                                          |                 |
| Reflections collected                        | 135972                                                               |                                          |                 |
| Independent reflections                      | 10939<br>$R_{\text{int}} = 0.0556$<br>$R_{\text{sigma}} = 0.0222$    |                                          |                 |
| Completeness to<br>$\theta = 25.242^\circ$   | 99.8 %                                                               |                                          |                 |
| Data / Restraints /<br>Parameters            | 10939/0/449                                                          |                                          |                 |
| Goodness-of-fit on $F^2$                     | 1.033                                                                |                                          |                 |
| Final $R$ indexes<br>[ $I \geq 2\sigma(I)$ ] | $R_1 = 0.0393$<br>$wR_2 = 0.1027$                                    |                                          |                 |
| Final $R$ indexes                            | $R_1 = 0.0454$                                                       |                                          |                 |

**Table S3.** Bond lengths and angles for **1**.

| <b>Atom–Atom</b>      | <b>Length [Å]</b> |             |            |
|-----------------------|-------------------|-------------|------------|
| P1–C18                | 1.8603(11)        | C6–C1–N2    | 121.84(9)  |
| P1–C19                | 1.8416(12)        | C6–C1–C2    | 120.49(9)  |
| P1–C25                | 1.8307(13)        | C32–P2–C31  | 101.17(5)  |
| N1–C2                 | 1.4133(14)        | C32–P2–C38  | 101.59(5)  |
| N1–C18                | 1.4631(14)        | C38–P2–C31  | 97.02(5)   |
| C1–N2                 | 1.4012(13)        | C13–N2–C1   | 120.21(9)  |
| C1–C2                 | 1.4193(14)        | N1–C2–C1    | 116.39(9)  |
| C1–C6                 | 1.3959(15)        | C3–C2–N1    | 124.33(9)  |
| P2–C31                | 1.8587(11)        | C3–C2–C1    | 119.26(10) |
| P2–C32                | 1.8343(11)        | C12–N3–C31  | 117.29(9)  |
| P2–C38                | 1.8363(11)        | C2–C3–C4    | 120.93(10) |
| N2–C13                | 1.3985(13)        | C3–C4–C14   | 121.39(10) |
| C2–C3                 | 1.3919(15)        | C5–C4–C3    | 118.49(10) |
| N3–C12                | 1.4182(14)        | C5–C4–C14   | 120.11(10) |
| N3–C31                | 1.4614(14)        | C4–C5–C6    | 122.30(10) |
| C3–C4                 | 1.4017(16)        | C1–C6–C5    | 118.29(10) |
| C4–C5                 | 1.3915(15)        | C1–C6–C7    | 121.79(9)  |
| C4–C14                | 1.5112(16)        | C5–C6–C7    | 119.91(9)  |
| C5–C6                 | 1.4018(15)        | C6–C7–C15   | 108.83(9)  |
| C6–C7                 | 1.5301(14)        | C6–C7–C16   | 109.70(9)  |
| C7–C8                 | 1.5267(14)        | C8–C7–C6    | 111.62(9)  |
| C7–C15                | 1.5453(15)        | C8–C7–C15   | 108.69(9)  |
| C7–C16                | 1.5458(15)        | C8–C7–C16   | 109.13(9)  |
| C8–C9                 | 1.4049(14)        | C15–C7–C16  | 108.81(10) |
| C8–C13                | 1.3970(14)        | C9–C8–C7    | 119.62(9)  |
| C9–C10                | 1.3893(15)        | C13–C8–C7   | 121.97(9)  |
| C10–C11               | 1.4005(15)        | C13–C8–C9   | 118.41(10) |
| C10–C17               | 1.5107(15)        | C10–C9–C8   | 122.22(10) |
| C11–C12               | 1.3932(14)        | C9–C10–C11  | 118.54(10) |
| C12–C13               | 1.4156(14)        | C9–C10–C17  | 120.62(10) |
| C19–C20               | 1.3969(18)        | C11–C10–C17 | 120.81(10) |
| C19–C24               | 1.3940(17)        | C12–C11–C10 | 120.96(10) |
| C20–C21               | 1.3959(18)        | C11–C12–N3  | 123.46(9)  |
| C21–C22               | 1.383(2)          | C11–C12–C13 | 119.49(10) |
| C22–C23               | 1.397(3)          | C13–C12–N3  | 117.00(9)  |
| C23–C24               | 1.3925(19)        | N2–C13–C12  | 117.87(9)  |
| C25–C26               | 1.3898(19)        | C8–C13–N2   | 121.76(9)  |
| C25–C30               | 1.4019(17)        | C8–C13–C12  | 120.37(9)  |
| C26–C27               | 1.3960(19)        | N1–C18–P1   | 114.03(7)  |
| C27–C28               | 1.377(3)          | C20–C19–P1  | 123.51(9)  |
| C28–C29               | 1.378(3)          | C24–C19–P1  | 118.07(10) |
| C29–C30               | 1.393(2)          | C24–C19–C20 | 118.35(11) |
| C32–C33               | 1.3998(16)        | C21–C20–C19 | 120.55(13) |
| C32–C37               | 1.3975(16)        | C22–C21–C20 | 120.56(14) |
| C33–C34               | 1.3878(17)        | C21–C22–C23 | 119.48(13) |
| C34–C35               | 1.3773(19)        | C24–C23–C22 | 119.75(14) |
| C35–C36               | 1.3872(18)        | C23–C24–C19 | 121.28(14) |
| C36–C37               | 1.3955(17)        | C26–C25–P1  | 124.79(10) |
| C38–C39               | 1.3997(16)        | C26–C25–C30 | 118.39(12) |
| C38–C43               | 1.3964(15)        | C30–C25–P1  | 116.76(11) |
| C39–C40               | 1.3934(17)        | C25–C26–C27 | 121.05(14) |
| C40–C41               | 1.385(2)          | C28–C27–C26 | 119.67(17) |
| C41–C42               | 1.385(2)          | C27–C28–C29 | 120.29(15) |
| C42–C43               | 1.3931(19)        | C28–C29–C30 | 120.37(15) |
|                       |                   | C29–C30–C25 | 120.18(16) |
|                       |                   | N3–C31–P2   | 111.82(7)  |
|                       |                   | C33–C32–P2  | 120.15(9)  |
|                       |                   | C37–C32–P2  | 121.34(9)  |
|                       |                   | C37–C32–C33 | 118.36(11) |
|                       |                   | C34–C33–C32 | 120.53(11) |
|                       |                   | C35–C34–C33 | 120.74(11) |
|                       |                   | C34–C35–C36 | 119.64(11) |
|                       |                   | C35–C36–C37 | 120.13(12) |
| <b>Atom–Atom–Atom</b> | <b>Angle [°]</b>  |             |            |
| C19–P1–C18            | 95.69(5)          |             |            |
| C25–P1–C18            | 102.07(5)         |             |            |
| C25–P1–C19            | 100.87(6)         |             |            |
| C2–N1–C18             | 120.19(9)         |             |            |
| N2–C1–C2              | 117.64(9)         |             |            |

|             |            |
|-------------|------------|
| C36–C37–C32 | 120.58(11) |
| C39–C38–P2  | 123.67(9)  |
| C43–C38–P2  | 118.16(9)  |
| C43–C38–C39 | 118.16(11) |
| C40–C39–C38 | 121.04(12) |
| C41–C40–C39 | 119.94(13) |

|             |            |
|-------------|------------|
| C42–C41–C40 | 119.76(12) |
| C41–C42–C43 | 120.41(12) |
| C42–C43–C38 | 120.67(12) |

Bonds to hydrogen atoms were omitted.

**Table S4.** Torsion angles for **1**.

**Atom–Atom–Atom–Atom**

|                 | <b>Torsion Angle [°]</b> |
|-----------------|--------------------------|
| P1–C19–C20–C21  | -175.73(11)              |
| P1–C19–C24–C23  | 176.39(10)               |
| P1–C25–C26–C27  | 178.72(12)               |
| P1–C25–C30–C29  | -179.51(10)              |
| N1–C2–C3–C4     | -177.39(10)              |
| C1–N2–C13–C8    | -7.35(15)                |
| C1–N2–C13–C12   | 173.47(9)                |
| C1–C2–C3–C4     | 4.18(16)                 |
| C1–C6–C7–C8     | -7.80(14)                |
| C1–C6–C7–C15    | 112.17(11)               |
| C1–C6–C7–C16    | -128.89(11)              |
| P2–C32–C33–C34  | -177.07(9)               |
| P2–C32–C37–C36  | 177.01(11)               |
| P2–C38–C39–C40  | -179.90(10)              |
| P2–C38–C43–C42  | 179.76(10)               |
| N2–C1–C2–N1     | -2.03(14)                |
| N2–C1–C2–C3     | 176.52(9)                |
| N2–C1–C6–C5     | -179.58(10)              |
| N2–C1–C6–C7     | 1.61(15)                 |
| C2–N1–C18–P1    | -87.78(10)               |
| C2–C1–N2–C13    | -175.57(9)               |
| C2–C1–C6–C5     | 2.47(15)                 |
| C2–C1–C6–C7     | -176.34(9)               |
| C2–C3–C4–C5     | 0.00(16)                 |
| C2–C3–C4–C14    | 178.72(10)               |
| N3–C12–C13–N2   | -2.02(14)                |
| N3–C12–C13–C8   | 178.80(9)                |
| C3–C4–C5–C6     | -3.10(17)                |
| C4–C5–C6–C1     | 1.85(16)                 |
| C4–C5–C6–C7     | -179.32(10)              |
| C5–C6–C7–C8     | 173.42(9)                |
| C5–C6–C7–C15    | -66.62(13)               |
| C5–C6–C7–C16    | 52.32(13)                |
| C6–C1–N2–C13    | 6.43(15)                 |
| C6–C1–C2–N1     | 176.00(9)                |
| C6–C1–C2–C3     | -5.45(15)                |
| C6–C7–C8–C9     | -173.19(9)               |
| C6–C7–C8–C13    | 6.92(13)                 |
| C7–C8–C9–C10    | 179.31(9)                |
| C7–C8–C13–N2    | 0.21(15)                 |
| C7–C8–C13–C12   | 179.37(9)                |
| C8–C9–C10–C11   | 1.17(16)                 |
| C8–C9–C10–C17   | 179.14(10)               |
| C9–C8–C13–N2    | -179.68(9)               |
| C9–C8–C13–C12   | -0.52(15)                |
| C9–C10–C11–C12  | -0.22(16)                |
| C10–C11–C12–N3  | -178.24(10)              |
| C10–C11–C12–C13 | -1.05(15)                |
| C11–C12–C13–N2  | -179.39(9)               |
| C11–C12–C13–C8  | 1.43(15)                 |
| C12–N3–C31–P2   | 167.49(8)                |
| C13–C8–C9–C10   | -0.79(15)                |

|                 |             |
|-----------------|-------------|
| C14–C4–C5–C6    | 178.16(10)  |
| C15–C7–C8–C9    | 66.77(12)   |
| C15–C7–C8–C13   | -113.12(11) |
| C16–C7–C8–C9    | -51.77(13)  |
| C16–C7–C8–C13   | 128.34(11)  |
| C17–C10–C11–C12 | -178.19(10) |
| C18–P1–C19–C20  | 83.58(11)   |
| C18–P1–C19–C24  | -93.40(10)  |
| C18–P1–C25–C26  | 11.78(12)   |
| C18–P1–C25–C30  | -171.01(9)  |
| C18–N1–C2–C1    | -172.57(9)  |
| C18–N1–C2–C3    | 8.96(15)    |
| C19–P1–C18–N1   | -178.82(8)  |
| C19–P1–C25–C26  | 110.08(11)  |
| C19–P1–C25–C30  | -72.71(10)  |
| C19–C20–C21–C22 | -0.5(2)     |
| C20–C19–C24–C23 | -0.75(19)   |
| C20–C21–C22–C23 | -0.8(2)     |
| C21–C22–C23–C24 | 1.3(2)      |
| C22–C23–C24–C19 | -0.5(2)     |
| C24–C19–C20–C21 | 1.24(19)    |
| C25–P1–C18–N1   | -76.40(9)   |
| C25–P1–C19–C20  | -19.91(12)  |
| C25–P1–C19–C24  | 163.11(10)  |
| C25–C26–C27–C28 | 0.3(2)      |
| C26–C25–C30–C29 | -2.12(19)   |
| C26–C27–C28–C29 | -1.6(3)     |
| C27–C28–C29–C30 | 1.0(2)      |
| C28–C29–C30–C25 | 0.9(2)      |
| C30–C25–C26–C27 | 1.6(2)      |
| C31–P2–C32–C33  | -143.66(9)  |
| C31–P2–C32–C37  | 40.85(11)   |
| C31–P2–C38–C39  | 70.09(11)   |
| C31–P2–C38–C43  | -108.65(10) |
| C31–N3–C12–C11  | 6.29(15)    |
| C31–N3–C12–C13  | -170.97(9)  |
| C32–P2–C31–N3   | -81.91(8)   |
| C32–P2–C38–C39  | -32.89(11)  |
| C32–P2–C38–C43  | 148.38(9)   |
| C32–C33–C34–C35 | 0.56(19)    |
| C33–C32–C37–C36 | 1.44(19)    |
| C33–C34–C35–C36 | 0.4(2)      |
| C34–C35–C36–C37 | -0.4(2)     |
| C35–C36–C37–C32 | -0.5(2)     |
| C37–C32–C33–C34 | -1.45(18)   |
| C38–P2–C31–N3   | 174.75(8)   |
| C38–P2–C32–C33  | -44.01(10)  |
| C38–P2–C32–C37  | 140.49(10)  |
| C38–C39–C40–C41 | 0.5(2)      |
| C39–C38–C43–C42 | 0.95(18)    |
| C39–C40–C41–C42 | 0.3(2)      |
| C40–C41–C42–C43 | -0.5(2)     |
| C41–C42–C43–C38 | -0.1(2)     |
| C43–C38–C39–C40 | -1.17(19)   |

Bonds to hydrogen atoms were omitted.

## Crystallographic Details of 2

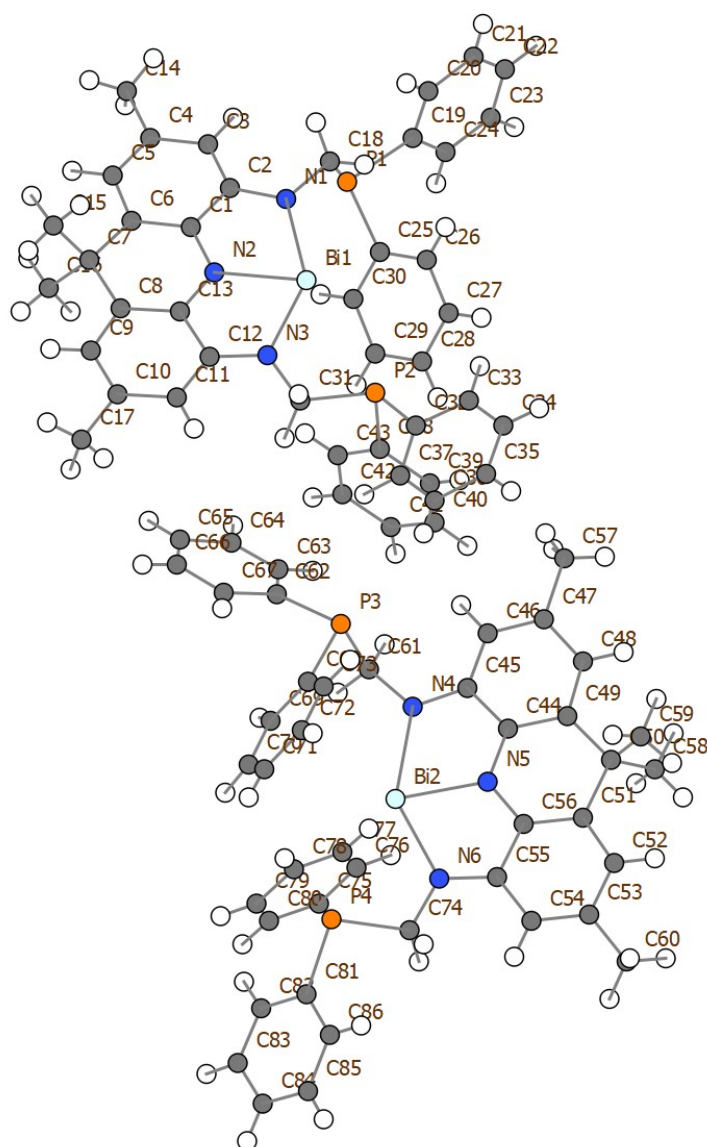

A clear dark violet, plate-shaped crystal of mo\_ja23\_ja\_ii\_18\_0m\_a (**2**) was mounted on a MiTeGen micromount with perfluoroether oil. Data were collected from a shock-cooled single crystal at 100.0 K on a Bruker D8 VENTURE dual wavelength Mo/Cu three-circle diffractometer with a microfocus sealed X-ray tube using a mirror optics as monochromator and a Bruker PHOTON III detector. The diffractometer was equipped with an Oxford Cryostream 800 low temperature device and used  $\text{MoK}_\alpha$  radiation ( $\lambda = 0.71073 \text{ \AA}$ ). All data were integrated with SAINT and a multi-scan absorption correction using SADABS was applied.<sup>[S2,S3]</sup> The structure was solved by iterative methods using olex2.solve and refined by full-matrix least-squares methods against  $F^2$  by olex2.refine using Olex2.<sup>[S4]</sup> All non-hydrogen atoms were refined with anisotropic displacement parameters. All hydrogen atoms were refined with isotropic displacement parameters. Some were refined freely and some on calculated positions using a riding model with their  $U_{\text{iso}}$  values constrained to 1.5 times the  $U_{\text{eq}}$  of their pivot atoms for terminal  $\text{sp}^3$  carbon atoms and 1.2 times for all other carbon atoms. Crystallographic data for the structures reported here have been deposited with the Cambridge Crystallographic Data Centre. CCDC 2320297 contain the supplementary crystallographic data for this paper.<sup>[S5]</sup> These data can be obtained free of charge from The Cambridge Crystallographic Data Centre via [www.ccdc.cam.ac.uk/structures](http://www.ccdc.cam.ac.uk/structures). This report was generated using FinalCif.<sup>[S6]</sup>

**Table S5.** Crystal data and structure refinement for **2**.

|                                                   |                                                                      |                                          |                                   |
|---------------------------------------------------|----------------------------------------------------------------------|------------------------------------------|-----------------------------------|
| CCDC number                                       | 2320297                                                              | Final <i>R</i> indexes<br>[all data]     | $R_1 = 0.0587$<br>$wR_2 = 0.0870$ |
| Empirical formula                                 | $C_{43}H_{40}BiN_3P_2$                                               | Largest peak/hole [ $e\text{\AA}^{-3}$ ] | 2.08/-1.65                        |
| Formula weight                                    | 869.745                                                              |                                          |                                   |
| Temperature [K]                                   | 100.00                                                               |                                          |                                   |
| Crystal system                                    | triclinic                                                            |                                          |                                   |
| Space group (number)                              | $P\bar{1}$ (2)                                                       |                                          |                                   |
| <i>a</i> [ $\text{\AA}$ ]                         | 12.5454(10)                                                          |                                          |                                   |
| <i>b</i> [ $\text{\AA}$ ]                         | 14.8524(15)                                                          |                                          |                                   |
| <i>c</i> [ $\text{\AA}$ ]                         | 20.970(2)                                                            |                                          |                                   |
| $\alpha$ [ $^\circ$ ]                             | 72.803(4)                                                            |                                          |                                   |
| $\beta$ [ $^\circ$ ]                              | 83.022(3)                                                            |                                          |                                   |
| $\gamma$ [ $^\circ$ ]                             | 86.907(3)                                                            |                                          |                                   |
| Volume [ $\text{\AA}^3$ ]                         | 3704.2(6)                                                            |                                          |                                   |
| <i>Z</i>                                          | 4                                                                    |                                          |                                   |
| $\rho_{\text{calc}}$ [ $\text{gcm}^{-3}$ ]        | 1.560                                                                |                                          |                                   |
| $\mu$ [ $\text{mm}^{-1}$ ]                        | 4.880                                                                |                                          |                                   |
| <i>F</i> (000)                                    | 1716.399                                                             |                                          |                                   |
| Crystal size [ $\text{mm}^3$ ]                    | 0.07×0.06×0.01                                                       |                                          |                                   |
| Crystal colour                                    | clear dark violet                                                    |                                          |                                   |
| Crystal shape                                     | plate                                                                |                                          |                                   |
| Radiation                                         | Mo $K_\alpha$ ( $\lambda=0.71073$ $\text{\AA}$ )                     |                                          |                                   |
| 2 $\theta$ range [ $^\circ$ ]                     | 3.98 to 56.78 (0.75 $\text{\AA}$ )                                   |                                          |                                   |
| Index ranges                                      | $-16 \leq h \leq 16$<br>$-19 \leq k \leq 19$<br>$-27 \leq l \leq 28$ |                                          |                                   |
| Reflections collected                             | 153010                                                               |                                          |                                   |
| Independent reflections                           | 18487<br>$R_{\text{int}} = 0.0972$<br>$R_{\text{sigma}} = 0.0514$    |                                          |                                   |
| Completeness to<br>$\theta = 25.2417^\circ$       | 100.0 %                                                              |                                          |                                   |
| Data / Restraints /<br>Parameters                 | 18487/0/891                                                          |                                          |                                   |
| Goodness-of-fit on $F^2$                          | 1.0131                                                               |                                          |                                   |
| Final <i>R</i> indexes<br>[ $I \geq 2\sigma(I)$ ] | $R_1 = 0.0367$<br>$wR_2 = 0.0771$                                    |                                          |                                   |

**Table S6.** Bond lengths and angles for **2**.

| <b>Atom–Atom</b> | <b>Length [Å]</b> |                       |                  |
|------------------|-------------------|-----------------------|------------------|
| Bi2–N5           | 2.180(3)          | C50–C59               | 1.548(6)         |
| Bi2–N4           | 2.296(3)          | C50–C58               | 1.546(6)         |
| Bi2–N6           | 2.307(3)          | C53–C60               | 1.510(6)         |
| Bi1–N2           | 2.186(3)          | C77–C78               | 1.377(7)         |
| Bi1–N1           | 2.287(4)          | C7–C6                 | 1.540(6)         |
| Bi1–N3           | 2.290(4)          | C7–C15                | 1.532(6)         |
| P4–C75           | 1.829(5)          | C7–C16                | 1.543(6)         |
| P4–C74           | 1.856(4)          | C9–C10                | 1.395(7)         |
| P4–C81           | 1.833(5)          | C5–C6                 | 1.382(6)         |
| P2–C31           | 1.864(4)          | C5–C4                 | 1.407(6)         |
| P2–C38           | 1.831(5)          | C19–C24               | 1.391(6)         |
| P2–C32           | 1.819(5)          | C19–C20               | 1.399(6)         |
| P3–C61           | 1.876(4)          | C68–C69               | 1.395(6)         |
| P3–C68           | 1.842(5)          | C68–C73               | 1.374(7)         |
| P3–C62           | 1.835(5)          | C3–C4                 | 1.385(6)         |
| P1–C25           | 1.833(5)          | C81–C86               | 1.394(6)         |
| P1–C18           | 1.873(4)          | C81–C82               | 1.400(6)         |
| P1–C19           | 1.837(5)          | C64–C65               | 1.377(7)         |
| N2–C1            | 1.372(6)          | C64–C63               | 1.390(6)         |
| N2–C13           | 1.376(5)          | C65–C66               | 1.384(7)         |
| N5–C44           | 1.371(5)          | C86–C85               | 1.395(6)         |
| N5–C56           | 1.389(5)          | C4–C14                | 1.508(7)         |
| N1–C2            | 1.353(5)          | C70–C69               | 1.374(7)         |
| N1–C18           | 1.440(5)          | C70–C71               | 1.388(7)         |
| N4–C45           | 1.365(5)          | C43–C38               | 1.394(6)         |
| N4–C61           | 1.439(5)          | C43–C42               | 1.379(7)         |
| N6–C55           | 1.355(5)          | C82–C83               | 1.385(6)         |
| N6–C74           | 1.459(5)          | C26–C27               | 1.376(7)         |
| N3–C12           | 1.359(5)          | C78–C79               | 1.392(7)         |
| N3–C31           | 1.459(6)          | C38–C39               | 1.400(6)         |
| C12–C13          | 1.433(6)          | C83–C84               | 1.383(7)         |
| C12–C11          | 1.408(6)          | C73–C72               | 1.387(7)         |
| C1–C2            | 1.424(6)          | C24–C23               | 1.390(7)         |
| C1–C6            | 1.407(6)          | C66–C67               | 1.386(7)         |
| C13–C8           | 1.414(6)          | C32–C37               | 1.403(6)         |
| C44–C45          | 1.431(6)          | C32–C33               | 1.390(6)         |
| C44–C49          | 1.410(6)          | C80–C79               | 1.391(7)         |
| C2–C3            | 1.413(6)          | C63–C62               | 1.389(6)         |
| C46–C45          | 1.406(6)          | C10–C17               | 1.516(6)         |
| C46–C47          | 1.385(6)          | C67–C62               | 1.411(6)         |
| C54–C55          | 1.413(6)          | C22–C23               | 1.375(7)         |
| C54–C53          | 1.380(6)          | C22–C21               | 1.391(7)         |
| C55–C56          | 1.430(6)          | C20–C21               | 1.382(7)         |
| C76–C75          | 1.403(6)          | C37–C36               | 1.380(7)         |
| C76–C77          | 1.379(7)          | C29–C28               | 1.399(8)         |
| C75–C80          | 1.393(6)          | C71–C72               | 1.383(8)         |
| C30–C25          | 1.386(7)          | C42–C41               | 1.388(7)         |
| C30–C29          | 1.387(7)          | C33–C34               | 1.385(7)         |
| C56–C51          | 1.398(6)          | C28–C27               | 1.379(8)         |
| C49–C50          | 1.530(6)          | C85–C84               | 1.377(7)         |
| C49–C48          | 1.383(6)          | C35–C36               | 1.392(8)         |
| C11–C10          | 1.383(6)          | C35–C34               | 1.371(8)         |
| C8–C7            | 1.529(6)          | C40–C39               | 1.392(7)         |
| C8–C9            | 1.393(6)          | C40–C41               | 1.385(8)         |
| C47–C48          | 1.404(6)          |                       |                  |
| C47–C57          | 1.505(6)          | <b>Atom–Atom–Atom</b> | <b>Angle [°]</b> |
| C52–C51          | 1.384(6)          | N4–Bi2–N5             | 71.89(13)        |
| C52–C53          | 1.404(6)          | N6–Bi2–N5             | 71.92(13)        |
| C25–C26          | 1.389(7)          | N6–Bi2–N4             | 143.79(12)       |
| C51–C50          | 1.529(6)          | N1–Bi1–N2             | 71.29(13)        |
|                  |                   | N3–Bi1–N2             | 72.03(13)        |



|             |            |             |          |
|-------------|------------|-------------|----------|
| N3-Bi1-N1   | 143.32(12) | C48-C49-C44 | 117.5(4) |
| C74-P4-C75  | 102.1(2)   | C48-C49-C50 | 121.4(4) |
| C81-P4-C75  | 98.6(2)    | C10-C11-C12 | 120.8(4) |
| C81-P4-C74  | 100.60(19) | N6-C74-P4   | 111.0(3) |
| C38-P2-C31  | 101.9(2)   | C7-C8-C13   | 121.6(4) |
| C32-P2-C31  | 103.5(2)   | C9-C8-C13   | 117.2(4) |
| C32-P2-C38  | 100.6(2)   | C9-C8-C7    | 121.1(4) |
| C68-P3-C61  | 98.1(2)    | N4-C61-P3   | 110.3(3) |
| C62-P3-C61  | 101.1(2)   | C48-C47-C46 | 119.0(4) |
| C62-P3-C68  | 100.7(2)   | C57-C47-C46 | 119.9(4) |
| C18-P1-C25  | 98.8(2)    | C57-C47-C48 | 121.1(4) |
| C19-P1-C25  | 100.5(2)   | C53-C52-C51 | 122.1(4) |
| C19-P1-C18  | 101.16(19) | C30-C25-P1  | 118.6(4) |
| C1-N2-Bi1   | 119.7(3)   | C26-C25-P1  | 122.7(4) |
| C13-N2-Bi1  | 119.2(3)   | C26-C25-C30 | 118.7(5) |
| C13-N2-C1   | 121.0(4)   | C52-C51-C56 | 118.2(4) |
| C44-N5-Bi2  | 119.9(3)   | C50-C51-C56 | 121.0(4) |
| C56-N5-Bi2  | 119.6(3)   | C50-C51-C52 | 120.8(4) |
| C56-N5-C44  | 120.4(3)   | N3-C31-P2   | 107.7(3) |
| C2-N1-Bi1   | 117.4(3)   | C51-C50-C49 | 112.1(3) |
| C18-N1-Bi1  | 121.8(3)   | C59-C50-C49 | 108.8(4) |
| C18-N1-C2   | 120.8(4)   | C59-C50-C51 | 108.2(4) |
| C45-N4-Bi2  | 116.2(3)   | C58-C50-C49 | 108.5(4) |
| C61-N4-Bi2  | 124.0(3)   | C58-C50-C51 | 109.5(4) |
| C61-N4-C45  | 119.8(3)   | C58-C50-C59 | 109.7(4) |
| C55-N6-Bi2  | 116.1(3)   | C52-C53-C54 | 119.5(4) |
| C74-N6-Bi2  | 125.3(3)   | C60-C53-C54 | 120.4(4) |
| C74-N6-C55  | 118.5(4)   | C60-C53-C52 | 120.1(4) |
| C12-N3-Bi1  | 116.5(3)   | C78-C77-C76 | 120.8(5) |
| C31-N3-Bi1  | 124.0(3)   | C47-C48-C49 | 122.8(4) |
| C31-N3-C12  | 119.3(4)   | C6-C7-C8    | 111.4(3) |
| C13-C12-N3  | 115.7(4)   | C15-C7-C8   | 109.3(4) |
| C11-C12-N3  | 126.4(4)   | C15-C7-C6   | 108.7(4) |
| C11-C12-C13 | 117.9(4)   | C16-C7-C8   | 108.3(4) |
| C2-C1-N2    | 116.2(4)   | C16-C7-C6   | 110.0(4) |
| C6-C1-N2    | 122.7(4)   | C16-C7-C15  | 109.1(4) |
| C6-C1-C2    | 121.1(4)   | C10-C9-C8   | 122.4(4) |
| C12-C13-N2  | 116.3(4)   | C4-C5-C6    | 122.4(4) |
| C8-C13-N2   | 122.0(4)   | N1-C18-P1   | 110.7(3) |
| C8-C13-C12  | 121.6(4)   | C7-C6-C1    | 121.1(4) |
| C45-C44-N5  | 116.1(4)   | C5-C6-C1    | 118.1(4) |
| C49-C44-N5  | 122.5(4)   | C5-C6-C7    | 120.8(4) |
| C49-C44-C45 | 121.4(4)   | C24-C19-P1  | 116.8(4) |
| C1-C2-N1    | 115.3(4)   | C20-C19-P1  | 124.4(3) |
| C3-C2-N1    | 126.4(4)   | C20-C19-C24 | 118.5(4) |
| C3-C2-C1    | 118.3(4)   | C69-C68-P3  | 121.9(4) |
| C47-C46-C45 | 121.1(4)   | C73-C68-P3  | 118.3(4) |
| C53-C54-C55 | 120.9(4)   | C73-C68-C69 | 119.8(4) |
| C54-C55-N6  | 125.7(4)   | C4-C3-C2    | 120.8(4) |
| C56-C55-N6  | 116.4(4)   | C86-C81-P4  | 122.2(3) |
| C56-C55-C54 | 117.8(4)   | C82-C81-P4  | 119.1(3) |
| C44-C45-N4  | 115.8(4)   | C82-C81-C86 | 118.6(4) |
| C46-C45-N4  | 126.2(4)   | C63-C64-C65 | 120.6(5) |
| C46-C45-C44 | 118.0(4)   | C66-C65-C64 | 119.6(4) |
| C77-C76-C75 | 120.9(5)   | C85-C86-C81 | 120.4(4) |
| C76-C75-P4  | 122.0(3)   | C3-C4-C5    | 119.2(4) |
| C80-C75-P4  | 119.7(4)   | C14-C4-C5   | 120.7(4) |
| C80-C75-C76 | 117.9(4)   | C14-C4-C3   | 120.0(4) |
| C29-C30-C25 | 120.3(5)   | C71-C70-C69 | 120.0(5) |
| C55-C56-N5  | 115.7(4)   | C42-C43-C38 | 121.2(4) |
| C51-C56-N5  | 122.8(4)   | C70-C69-C68 | 120.2(5) |
| C51-C56-C55 | 121.4(4)   | C83-C82-C81 | 120.7(4) |
| C50-C49-C44 | 121.1(4)   | C27-C26-C25 | 121.0(5) |

|             |          |             |          |
|-------------|----------|-------------|----------|
| C79–C78–C77 | 119.3(4) | C67–C62–P3  | 120.4(4) |
| C43–C38–P2  | 120.2(3) | C67–C62–C63 | 118.0(4) |
| C39–C38–P2  | 121.2(4) | C28–C29–C30 | 120.6(5) |
| C39–C38–C43 | 118.2(4) | C72–C71–C70 | 119.8(5) |
| C84–C83–C82 | 119.9(4) | C80–C79–C78 | 120.2(5) |
| C72–C73–C68 | 120.1(5) | C41–C42–C43 | 119.9(5) |
| C23–C24–C19 | 120.5(5) | C71–C72–C73 | 120.1(5) |
| C67–C66–C65 | 120.4(5) | C22–C23–C24 | 121.0(5) |
| C37–C32–P2  | 123.6(4) | C20–C21–C22 | 120.9(5) |
| C33–C32–P2  | 117.4(4) | C34–C33–C32 | 120.6(5) |
| C33–C32–C37 | 118.8(4) | C27–C28–C29 | 118.5(5) |
| C79–C80–C75 | 120.9(5) | C84–C85–C86 | 120.0(5) |
| C62–C63–C64 | 120.8(4) | C85–C84–C83 | 120.4(5) |
| C9–C10–C11  | 120.1(4) | C34–C35–C36 | 120.5(5) |
| C17–C10–C11 | 120.7(4) | C41–C40–C39 | 119.6(5) |
| C17–C10–C9  | 119.1(4) | C40–C39–C38 | 120.8(5) |
| C62–C67–C66 | 120.6(5) | C35–C36–C37 | 119.6(5) |
| C21–C22–C23 | 118.7(5) | C28–C27–C26 | 120.8(5) |
| C21–C20–C19 | 120.3(4) | C35–C34–C33 | 120.1(5) |
| C36–C37–C32 | 120.5(5) | C40–C41–C42 | 120.2(5) |
| C63–C62–P3  | 121.3(3) |             |          |

Bonds to hydrogen atoms were omitted.

**Table S7.** Torsion angles for **2**.

| <b>Atom–Atom–Atom–Atom</b> | <b>Torsion Angle [°]</b> |                 |           |
|----------------------------|--------------------------|-----------------|-----------|
| Bi2–N5–C44–C45             | 0.4(3)                   | P1–C19–C24–C23  | 173.3(4)  |
| Bi2–N5–C44–C49             | –178.8(3)                | P1–C19–C20–C21  | –171.0(4) |
| Bi2–N5–C56–C55             | –3.3(3)                  | N2–C1–C2–N1     | –2.0(4)   |
| Bi2–N5–C56–C51             | 177.4(3)                 | N2–C1–C2–C3     | 177.2(4)  |
| Bi2–N4–C45–C44             | 3.8(3)                   | N2–C1–C6–C7     | 3.7(5)    |
| Bi2–N4–C45–C46             | –175.4(3)                | N2–C1–C6–C5     | –177.8(4) |
| Bi2–N4–C61–P3              | 92.3(2)                  | N2–C13–C12–N3   | –1.4(4)   |
| Bi2–N6–C55–C54             | –177.7(3)                | N2–C13–C12–C11  | 179.6(4)  |
| Bi2–N6–C55–C56             | 3.2(3)                   | N2–C13–C8–C7    | 2.0(5)    |
| Bi2–N6–C74–P4              | –14.0(3)                 | N2–C13–C8–C9    | –179.7(4) |
| Bi1–N2–C1–C2               | –0.6(3)                  | N5–C44–C45–N4   | –2.8(4)   |
| Bi1–N2–C1–C6               | 179.8(3)                 | N5–C44–C45–C46  | 176.5(4)  |
| Bi1–N2–C13–C12             | –2.0(3)                  | N5–C44–C49–C50  | 0.6(5)    |
| Bi1–N2–C13–C8              | 177.3(3)                 | N5–C44–C49–C48  | –179.0(4) |
| Bi1–N1–C2–C1               | 3.6(3)                   | N5–C56–C55–N6   | –0.1(4)   |
| Bi1–N1–C2–C3               | –175.5(3)                | N5–C56–C55–C54  | –179.3(4) |
| Bi1–N1–C18–P1              | 94.5(2)                  | N5–C56–C51–C52  | 179.8(4)  |
| Bi1–N3–C12–C13             | 4.0(3)                   | N5–C56–C51–C50  | 2.1(5)    |
| Bi1–N3–C12–C11             | –177.1(3)                | N1–C2–C1–C6     | 177.6(4)  |
| Bi1–N3–C31–P2              | –14.7(3)                 | N1–C2–C3–C4     | 179.9(5)  |
| P4–C75–C76–C77             | 173.2(4)                 | N4–C45–C44–C49  | 176.3(4)  |
| P4–C75–C80–C79             | –173.2(4)                | N4–C45–C46–C47  | –177.9(4) |
| P4–C74–N6–C55              | 170.0(3)                 | N6–C55–C54–C53  | –179.3(4) |
| P4–C81–C86–C85             | 177.0(4)                 | N6–C55–C56–C51  | 179.2(4)  |
| P4–C81–C82–C83             | –176.2(3)                | N3–C12–C13–C8   | 179.3(4)  |
| P2–C31–N3–C12              | 169.8(3)                 | N3–C12–C11–C10  | –178.6(4) |
| P2–C38–C43–C42             | 173.6(4)                 | C12–C13–C8–C7   | –178.7(4) |
| P2–C38–C39–C40             | –173.9(4)                | C12–C13–C8–C9   | –0.5(5)   |
| P2–C32–C37–C36             | 175.9(4)                 | C12–C11–C10–C9  | –0.6(5)   |
| P2–C32–C33–C34             | –175.3(4)                | C12–C11–C10–C17 | 177.1(4)  |
| P3–C61–N4–C45              | –85.2(3)                 | C1–C2–C3–C4     | 0.8(5)    |
| P3–C68–C69–C70             | 177.3(4)                 | C1–C6–C7–C8     | –3.4(5)   |
| P3–C68–C73–C72             | –178.7(4)                | C1–C6–C7–C15    | 117.1(5)  |
| P3–C62–C63–C64             | –174.2(4)                | C1–C6–C7–C16    | –123.5(5) |
| P3–C62–C67–C66             | 174.4(4)                 | C1–C6–C5–C4     | 0.4(5)    |
| P1–C25–C30–C29             | –177.8(4)                | C13–C8–C7–C6    | 0.7(4)    |
| P1–C25–C26–C27             | 177.9(4)                 | C13–C8–C7–C15   | –119.4(4) |
| P1–C18–N1–C2               | –83.2(3)                 | C13–C8–C7–C16   | 121.8(4)  |
|                            |                          | C13–C8–C9–C10   | 0.1(5)    |

|                 |           |                 |          |
|-----------------|-----------|-----------------|----------|
| C44-C45-C46-C47 | 2.9(5)    | C25-C26-C27-C28 | 0.1(5)   |
| C44-C49-C50-C51 | 0.2(4)    | C77-C78-C79-C80 | 0.3(6)   |
| C44-C49-C50-C59 | -119.4(4) | C7-C6-C5-C4     | 178.9(4) |
| C44-C49-C50-C58 | 121.3(4)  | C19-C24-C23-C22 | -1.6(6)  |
| C44-C49-C48-C47 | 2.1(5)    | C19-C20-C21-C22 | -2.0(6)  |
| C2-C3-C4-C5     | 2.1(5)    | C68-C69-C70-C71 | 2.3(5)   |
| C2-C3-C4-C14    | -176.8(4) | C68-C73-C72-C71 | 0.3(6)   |
| C46-C47-C48-C49 | -3.6(5)   | C81-C86-C85-C84 | -1.4(5)  |
| C54-C55-C56-C51 | 0.0(5)    | C81-C82-C83-C84 | -0.5(5)  |
| C54-C53-C52-C51 | 0.8(5)    | C64-C65-C66-C67 | 0.8(6)   |
| C55-C56-C51-C52 | 0.6(5)    | C64-C63-C62-C67 | -0.1(6)  |
| C55-C56-C51-C50 | -177.2(4) | C65-C66-C67-C62 | -0.6(6)  |
| C76-C75-C80-C79 | 0.1(5)    | C86-C85-C84-C83 | 1.1(6)   |
| C76-C77-C78-C79 | -0.1(6)   | C70-C71-C72-C73 | 1.1(6)   |
| C75-C80-C79-C78 | -0.2(6)   | C43-C38-C39-C40 | -0.5(5)  |
| C30-C25-C26-C27 | 0.3(5)    | C43-C42-C41-C40 | 0.7(6)   |
| C30-C29-C28-C27 | 1.0(6)    | C82-C83-C84-C85 | -0.1(6)  |
| C56-C51-C52-C53 | -1.0(5)   | C26-C27-C28-C29 | -0.7(6)  |
| C56-C51-C50-C49 | -1.5(4)   | C38-C39-C40-C41 | 0.9(6)   |
| C56-C51-C50-C59 | 118.5(4)  | C24-C23-C22-C21 | 2.1(7)   |
| C56-C51-C50-C58 | -122.0(4) | C66-C67-C62-C63 | 0.3(6)   |
| C49-C50-C51-C52 | -179.2(4) | C32-C37-C36-C35 | -1.3(6)  |
| C49-C48-C47-C57 | 175.0(4)  | C32-C33-C34-C35 | -0.6(6)  |
| C11-C10-C9-C8   | 0.4(5)    | C37-C36-C35-C34 | 0.7(7)   |
| C8-C7-C6-C5     | 178.2(4)  | C42-C41-C40-C39 | -1.0(6)  |
| C8-C9-C10-C17   | -177.3(4) | C33-C34-C35-C36 | 0.3(7)   |
| C52-C51-C50-C59 | -59.2(4)  |                 |          |
| C52-C51-C50-C58 | 60.3(5)   |                 |          |

Bonds to hydrogen atoms were omitted.

### Crystallographic Details of **3**

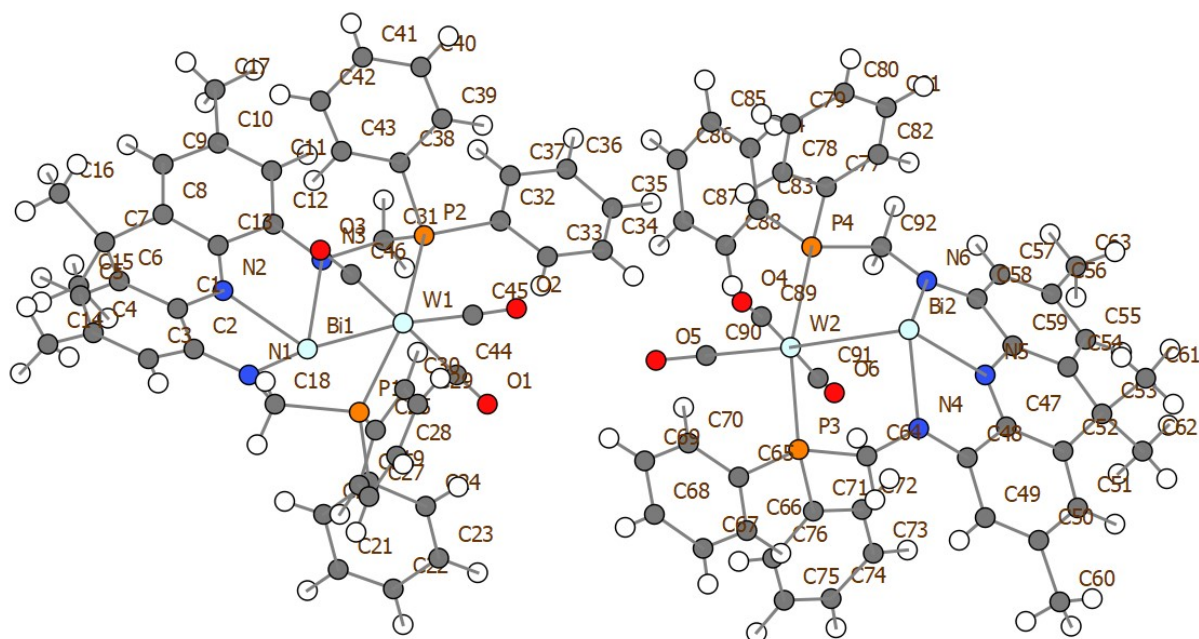

A clear dark blue, block-shaped crystal of mo\_ja23\_JA\_i\_85\_0m\_a (**3**) was mounted on a MiTeGen micromount with perfluoroether oil. Data were collected from a shock-cooled single crystal at 100.0 K on a Bruker D8 VENTURE dual wavelength Mo/Cu three-circle diffractometer with a microfocus sealed X-ray tube using a mirror optics as monochromator and a Bruker PHOTON III detector. The diffractometer was equipped with an Oxford Cryostream 800 low temperature device and used MoK $\alpha$  radiation ( $\lambda = 0.71073 \text{ \AA}$ ). All data were integrated with SAINT and a multi-scan absorption correction using SADABS was applied.<sup>[S2,S3]</sup> The structure was solved by iterative methods using olex2.solve and refined by full-matrix least-squares methods against  $F^2$  by olex2.refine using Olex2.<sup>[S4]</sup> All non-hydrogen atoms were refined with anisotropic displacement parameters. All hydrogen atoms were refined with isotropic displacement parameters. Some were refined freely and some on calculated positions using a riding model with their  $U_{iso}$  values constrained to 1.5 times the  $U_{eq}$  of their pivot atoms for terminal  $sp^3$  carbon atoms and 1.2 times for all other carbon atoms. Crystallographic data for the structures reported here have been deposited with the Cambridge Crystallographic Data Centre. CCDC 2320304 contain the supplementary crystallographic data for this paper.<sup>[S5]</sup> These data can be obtained free of charge from The Cambridge Crystallographic Data Centre via [www.ccdc.cam.ac.uk/structures](http://www.ccdc.cam.ac.uk/structures). This report was generated using FinalCif.<sup>[S6]</sup>

**Table S8.** Crystal data and structure refinement for **3**.

|                                                   |                                                                   |                                          |                                   |
|---------------------------------------------------|-------------------------------------------------------------------|------------------------------------------|-----------------------------------|
| CCDC number                                       | 2320304                                                           | Final <i>R</i> indexes<br>[all data]     | $R_1 = 0.0910$<br>$wR_2 = 0.1334$ |
| Empirical formula                                 | $C_{106}H_{96}Bi_2N_6O_6P_4W_2$                                   | Largest peak/hole [ $e\text{\AA}^{-3}$ ] | 3.59/-1.80                        |
| Formula weight                                    | 1229.760                                                          |                                          |                                   |
| Temperature [K]                                   | 100.0                                                             |                                          |                                   |
| Crystal system                                    | triclinic                                                         |                                          |                                   |
| Space group (number)                              | $P\bar{1}$ (2)                                                    |                                          |                                   |
| <i>a</i> [Å]                                      | 10.9439(7)                                                        |                                          |                                   |
| <i>b</i> [Å]                                      | 21.0052(10)                                                       |                                          |                                   |
| <i>c</i> [Å]                                      | 21.9721(12)                                                       |                                          |                                   |
| $\alpha$ [°]                                      | 92.010(2)                                                         |                                          |                                   |
| $\beta$ [°]                                       | 101.049(2)                                                        |                                          |                                   |
| $\gamma$ [°]                                      | 103.267(2)                                                        |                                          |                                   |
| Volume [Å <sup>3</sup> ]                          | 4808.4(5)                                                         |                                          |                                   |
| <i>Z</i>                                          | 4                                                                 |                                          |                                   |
| $\rho_{\text{calc}}$ [gcm <sup>-3</sup> ]         | 1.699                                                             |                                          |                                   |
| $\mu$ [mm <sup>-1</sup> ]                         | 6.157                                                             |                                          |                                   |
| <i>F</i> (000)                                    | 2379.248                                                          |                                          |                                   |
| Crystal size [mm <sup>3</sup> ]                   | 0.08×0.07×0.02                                                    |                                          |                                   |
| Crystal colour                                    | clear dark blue                                                   |                                          |                                   |
| Crystal shape                                     | block                                                             |                                          |                                   |
| Radiation                                         | Mo $K_\alpha$ ( $\lambda=0.71073$ Å)                              |                                          |                                   |
| 2 $\theta$ range [°]                              | 3.94 to 50.86 (0.83 Å)                                            |                                          |                                   |
| Index ranges                                      | -13 ≤ <i>h</i> ≤ 13<br>-23 ≤ <i>k</i> ≤ 25<br>-26 ≤ <i>l</i> ≤ 26 |                                          |                                   |
| Reflections collected                             | 58362                                                             |                                          |                                   |
| Independent reflections                           | 17672<br>$R_{\text{int}} = 0.1025$<br>$R_{\text{sigma}} = 0.1049$ |                                          |                                   |
| Completeness to<br>$\theta = 25.2417^\circ$       | 99.8 %                                                            |                                          |                                   |
| Data / Restraints /<br>Parameters                 | 17672/2/987                                                       |                                          |                                   |
| Goodness-of-fit on $F^2$                          | 0.9731                                                            |                                          |                                   |
| Final <i>R</i> indexes<br>[ $I \geq 2\sigma(I)$ ] | $R_1 = 0.0515$<br>$wR_2 = 0.1138$                                 |                                          |                                   |

**Table S9.** Bond lengths and angles for **3**.

| <b>Atom–Atom</b> | <b>Length [Å]</b> |         |           |
|------------------|-------------------|---------|-----------|
| Bi2–W2           | 2.8049(6)         | C58–C57 | 1.415(14) |
| Bi2–N6           | 2.368(8)          | C11–C10 | 1.365(14) |
| Bi2–N5           | 2.264(8)          | C83–C88 | 1.375(16) |
| Bi2–N4           | 2.303(8)          | C83–C84 | 1.348(15) |
| Bi1–W1           | 2.8059(6)         | C19–C20 | 1.37(2)   |
| Bi1–N3           | 2.328(8)          | C19–C24 | 1.39(2)   |
| Bi1–N1           | 2.346(8)          | C8–C13  | 1.407(14) |
| Bi1–N2           | 2.256(8)          | C8–C7   | 1.552(15) |
| W1–P2            | 2.453(3)          | C8–C9   | 1.363(15) |
| W1–P1            | 2.460(3)          | C47–C52 | 1.424(14) |
| W1–C46           | 2.026(12)         | C33–C34 | 1.356(17) |
| W1–C44           | 2.006(12)         | C33–C32 | 1.362(15) |
| W1–C45           | 1.892(13)         | C71–C72 | 1.370(12) |
| W2–P4            | 2.455(3)          | C71–C76 | 1.382(12) |
| W2–P3            | 2.451(3)          | C52–C53 | 1.504(16) |
| W2–C90           | 1.977(13)         | C52–C51 | 1.375(16) |
| W2–C89           | 2.004(13)         | C43–C42 | 1.389(16) |
| W2–C91           | 2.032(13)         | C43–C38 | 1.352(14) |
| P4–C92           | 1.854(10)         | C53–C62 | 1.505(15) |
| P4–C83           | 1.842(11)         | C53–C61 | 1.605(16) |
| P4–C77           | 1.815(10)         | C13–N2  | 1.333(13) |
| P2–C31           | 1.887(10)         | C51–C50 | 1.384(16) |
| P2–C38           | 1.851(11)         | C7–C6   | 1.506(16) |
| P2–C32           | 1.840(11)         | C7–C16  | 1.499(14) |
| P3–C64           | 1.900(10)         | C7–C15  | 1.558(16) |
| P3–C71           | 1.834(11)         | C50–C49 | 1.359(15) |
| P3–C65           | 1.851(12)         | C50–C60 | 1.542(15) |
| P1–C25           | 1.816(12)         | C57–C56 | 1.349(14) |
| P1–C19           | 1.804(14)         | C10–C9  | 1.409(15) |
| P1–C18           | 1.866(11)         | C10–C17 | 1.522(15) |
| N6–C92           | 1.443(13)         | C86–C87 | 1.40(2)   |
| N6–C58           | 1.327(12)         | C86–C85 | 1.39(2)   |
| N3–C12           | 1.329(12)         | C79–C78 | 1.414(15) |
| N3–C31           | 1.435(12)         | C79–C80 | 1.375(17) |
| N1–C2            | 1.332(13)         | C2–C3   | 1.439(15) |
| N1–C18           | 1.451(13)         | C88–C87 | 1.390(17) |
| N5–C59           | 1.353(13)         | C82–C81 | 1.379(17) |
| N5–C47           | 1.339(13)         | C82–C77 | 1.372(15) |
| N4–C48           | 1.330(12)         | C72–C73 | 1.353(16) |
| N4–C64           | 1.471(12)         | O6–C91  | 1.112(13) |
| O5–C90           | 1.178(14)         | C65–C70 | 1.361(16) |
| O4–C89           | 1.170(13)         | C65–C66 | 1.399(18) |
| O3–C46           | 1.121(12)         | C6–C5   | 1.384(16) |
| O1–C44           | 1.141(12)         | C70–C69 | 1.397(18) |
| C25–C30          | 1.388(17)         | C45–O2  | 1.188(14) |
| C25–C26          | 1.395(17)         | C3–C4   | 1.348(16) |
| C1–C2            | 1.432(15)         | C76–C75 | 1.369(18) |
| C1–C6            | 1.418(14)         | C20–C21 | 1.466(17) |
| C1–N2            | 1.360(13)         | C78–C77 | 1.385(14) |
| C48–C47          | 1.415(15)         | C56–C55 | 1.438(16) |
| C48–C49          | 1.432(14)         | C56–C63 | 1.486(16) |
| C12–C11          | 1.420(15)         | C37–C36 | 1.409(16) |
| C12–C13          | 1.450(14)         | C37–C32 | 1.387(16) |
| C54–C59          | 1.428(14)         | C39–C40 | 1.388(19) |
| C54–C53          | 1.516(15)         | C39–C38 | 1.369(16) |
| C54–C55          | 1.359(15)         | C42–C41 | 1.38(2)   |
| C59–C58          | 1.444(14)         | C4–C5   | 1.417(18) |
|                  |                   | C4–C14  | 1.488(16) |

|                       |                  |             |           |
|-----------------------|------------------|-------------|-----------|
| C80–C81               | 1.321(18)        | C92–P4–W2   | 110.4(3)  |
| C84–C85               | 1.346(18)        | C83–P4–W2   | 121.3(4)  |
| C27–C28               | 1.35(2)          | C83–P4–C92  | 100.1(5)  |
| C27–C26               | 1.354(18)        | C77–P4–W2   | 118.0(4)  |
| C69–C68               | 1.40(2)          | C77–P4–C92  | 102.3(5)  |
| C24–C23               | 1.377(17)        | C77–P4–C83  | 101.8(5)  |
| C73–C74               | 1.40(2)          | C31–P2–W1   | 112.8(3)  |
| C75–C74               | 1.31(2)          | C38–P2–W1   | 115.8(4)  |
| C34–C35               | 1.37(2)          | C38–P2–C31  | 102.8(5)  |
| C29–C28               | 1.33(2)          | C32–P2–W1   | 121.8(4)  |
| C29–C30               | 1.430(19)        | C32–P2–C31  | 97.9(5)   |
| C36–C35               | 1.38(2)          | C32–P2–C38  | 102.8(5)  |
| C23–C22               | 1.34(2)          | C64–P3–W2   | 113.3(3)  |
| C68–C67               | 1.33(2)          | C71–P3–W2   | 116.3(4)  |
| C40–C41               | 1.34(2)          | C71–P3–C64  | 101.3(5)  |
| C22–C21               | 1.31(2)          | C65–P3–W2   | 119.7(4)  |
| C66–C67               | 1.368(19)        | C65–P3–C64  | 98.5(5)   |
|                       |                  | C65–P3–C71  | 104.8(5)  |
| <b>Atom–Atom–Atom</b> | <b>Angle [°]</b> | C25–P1–W1   | 122.3(4)  |
| N6–Bi2–W2             | 87.6(2)          | C19–P1–W1   | 115.4(5)  |
| N5–Bi2–W2             | 118.8(2)         | C19–P1–C25  | 102.6(6)  |
| N5–Bi2–N6             | 69.4(3)          | C18–P1–W1   | 111.6(4)  |
| N4–Bi2–W2             | 91.8(2)          | C18–P1–C25  | 98.8(5)   |
| N4–Bi2–N6             | 132.0(3)         | C18–P1–C19  | 103.5(7)  |
| N4–Bi2–N5             | 69.2(3)          | C92–N6–Bi2  | 121.4(6)  |
| N3–Bi1–W1             | 91.8(2)          | C58–N6–Bi2  | 116.6(7)  |
| N1–Bi1–W1             | 88.6(2)          | C58–N6–C92  | 120.5(9)  |
| N1–Bi1–N3             | 133.3(3)         | C12–N3–Bi1  | 116.7(7)  |
| N2–Bi1–W1             | 118.8(2)         | C31–N3–Bi1  | 117.1(6)  |
| N2–Bi1–N3             | 69.6(3)          | C31–N3–C12  | 124.7(9)  |
| N2–Bi1–N1             | 69.6(3)          | C2–N1–Bi1   | 116.0(7)  |
| P2–W1–Bi1             | 86.59(7)         | C18–N1–Bi1  | 121.0(7)  |
| P1–W1–Bi1             | 79.71(7)         | C18–N1–C2   | 121.5(9)  |
| P1–W1–P2              | 165.90(10)       | C59–N5–Bi2  | 117.7(7)  |
| C46–W1–Bi1            | 93.1(3)          | C47–N5–Bi2  | 117.6(7)  |
| C46–W1–P2             | 92.2(3)          | C47–N5–C59  | 123.9(9)  |
| C46–W1–P1             | 85.3(3)          | C48–N4–Bi2  | 117.4(7)  |
| C44–W1–Bi1            | 88.7(3)          | C64–N4–Bi2  | 118.1(6)  |
| C44–W1–P2             | 90.0(4)          | C64–N4–C48  | 123.7(9)  |
| C44–W1–P1             | 93.0(3)          | N6–C92–P4   | 110.1(7)  |
| C44–W1–C46            | 177.2(5)         | O3–C46–W1   | 174.6(11) |
| C45–W1–Bi1            | 173.0(4)         | C30–C25–P1  | 120.4(9)  |
| C45–W1–P2             | 95.5(4)          | C26–C25–P1  | 122.0(10) |
| C45–W1–P1             | 98.5(4)          | C26–C25–C30 | 117.5(12) |
| C45–W1–C46            | 93.5(5)          | C6–C1–C2    | 124.7(10) |
| C45–W1–C44            | 84.6(5)          | N2–C1–C2    | 114.2(9)  |
| P4–W2–Bi2             | 78.07(7)         | N2–C1–C6    | 120.6(11) |
| P3–W2–Bi2             | 86.53(7)         | C47–C48–N4  | 116.3(9)  |
| P3–W2–P4              | 164.37(10)       | C49–C48–N4  | 126.7(11) |
| C90–W2–Bi2            | 176.5(3)         | C49–C48–C47 | 117.0(10) |
| C90–W2–P4             | 98.6(3)          | O5–C90–W2   | 177.7(11) |
| C90–W2–P3             | 96.8(3)          | N4–C64–P3   | 108.3(6)  |
| C89–W2–Bi2            | 89.4(3)          | C11–C12–N3  | 126.1(10) |
| C89–W2–P4             | 93.2(3)          | C13–C12–N3  | 116.8(10) |
| C89–W2–P3             | 89.3(3)          | C13–C12–C11 | 117.1(9)  |
| C89–W2–C90            | 89.8(4)          | C53–C54–C59 | 118.8(10) |
| C91–W2–Bi2            | 91.6(4)          | C55–C54–C59 | 115.9(10) |
| C91–W2–P4             | 85.9(3)          | C55–C54–C53 | 125.2(9)  |
| C91–W2–P3             | 91.9(3)          | C54–C59–N5  | 120.2(10) |
| C91–W2–C90            | 89.1(5)          | C58–C59–N5  | 116.2(9)  |
| C91–W2–C89            | 178.5(5)         | C58–C59–C54 | 122.9(10) |

|             |           |             |           |
|-------------|-----------|-------------|-----------|
| C59-C58-N6  | 116.1(9)  | C73-C72-C71 | 122.7(13) |
| C57-C58-N6  | 127.9(10) | C70-C65-P3  | 118.8(10) |
| C57-C58-C59 | 116.0(9)  | C66-C65-P3  | 120.8(10) |
| C10-C11-C12 | 120.1(10) | C66-C65-C70 | 120.3(12) |
| C88-C83-P4  | 118.2(9)  | C7-C6-C1    | 120.4(10) |
| C84-C83-P4  | 123.3(10) | C5-C6-C1    | 114.2(11) |
| C84-C83-C88 | 118.5(11) | C5-C6-C7    | 125.4(11) |
| C20-C19-P1  | 125.2(13) | C69-C70-C65 | 120.4(14) |
| C24-C19-P1  | 118.6(13) | O2-C45-W1   | 179.5(13) |
| C24-C19-C20 | 116.2(14) | C4-C3-C2    | 122.0(12) |
| C7-C8-C13   | 117.2(10) | C75-C76-C71 | 119.9(14) |
| C9-C8-C13   | 119.3(10) | C21-C20-C19 | 120.6(16) |
| C9-C8-C7    | 123.4(9)  | C77-C78-C79 | 120.3(10) |
| C48-C47-N5  | 115.7(9)  | C55-C56-C57 | 118.8(11) |
| C52-C47-N5  | 121.2(10) | C63-C56-C57 | 121.4(11) |
| C52-C47-C48 | 122.8(10) | C63-C56-C55 | 119.8(10) |
| C32-C33-C34 | 121.8(14) | C32-C37-C36 | 119.6(13) |
| C72-C71-P3  | 119.9(9)  | C1-N2-Bi1   | 118.8(7)  |
| C76-C71-P3  | 123.3(10) | C13-N2-Bi1  | 119.2(7)  |
| C76-C71-C72 | 116.6(12) | C13-N2-C1   | 121.4(9)  |
| C53-C52-C47 | 118.9(10) | C38-C39-C40 | 118.6(13) |
| C51-C52-C47 | 116.2(11) | C41-C42-C43 | 116.2(13) |
| C51-C52-C53 | 124.8(10) | C56-C55-C54 | 123.6(10) |
| C38-C43-C42 | 123.9(13) | O6-C91-W2   | 176.7(11) |
| C52-C53-C54 | 112.4(9)  | C5-C4-C3    | 119.3(11) |
| C62-C53-C54 | 112.9(10) | C14-C4-C3   | 120.7(13) |
| C62-C53-C52 | 113.8(10) | C14-C4-C5   | 120.0(12) |
| C61-C53-C54 | 104.5(9)  | C81-C80-C79 | 119.6(12) |
| C61-C53-C52 | 105.2(10) | C85-C84-C83 | 123.1(15) |
| C61-C53-C62 | 107.2(10) | C26-C27-C28 | 122.7(15) |
| C8-C13-C12  | 120.8(10) | C68-C69-C70 | 117.1(15) |
| N2-C13-C12  | 114.8(9)  | C23-C24-C19 | 122.4(17) |
| N2-C13-C8   | 124.3(10) | C74-C73-C72 | 119.2(14) |
| C50-C51-C52 | 122.3(11) | C74-C75-C76 | 123.4(15) |
| O4-C89-W2   | 175.5(10) | C75-C74-C73 | 118.1(14) |
| C6-C7-C8    | 110.3(9)  | C4-C5-C6    | 124.4(11) |
| C16-C7-C8   | 110.8(10) | C35-C34-C33 | 120.4(15) |
| C16-C7-C6   | 111.6(10) | C30-C29-C28 | 119.3(15) |
| C15-C7-C8   | 106.7(9)  | C29-C28-C27 | 120.4(14) |
| C15-C7-C6   | 106.1(10) | C29-C30-C25 | 120.1(13) |
| C15-C7-C16  | 111.2(10) | C27-C26-C25 | 119.8(14) |
| C49-C50-C51 | 121.9(10) | C80-C81-C82 | 122.2(13) |
| C60-C50-C51 | 118.6(11) | C35-C36-C37 | 119.2(15) |
| C60-C50-C49 | 119.5(11) | C22-C23-C24 | 120.0(17) |
| C56-C57-C58 | 122.7(11) | C67-C68-C69 | 122.8(15) |
| C9-C10-C11  | 121.5(10) | C36-C35-C34 | 119.9(12) |
| C17-C10-C11 | 119.9(11) | C41-C40-C39 | 122.0(15) |
| C17-C10-C9  | 118.6(10) | C21-C22-C23 | 121.9(15) |
| C85-C86-C87 | 123.7(14) | C82-C77-P4  | 123.6(8)  |
| C80-C79-C78 | 119.3(11) | C78-C77-P4  | 118.8(8)  |
| O1-C44-W1   | 179.4(11) | C78-C77-C82 | 117.6(10) |
| N3-C31-P2   | 111.0(7)  | C43-C38-P2  | 119.7(9)  |
| C1-C2-N1    | 117.9(9)  | C39-C38-P2  | 121.6(9)  |
| C3-C2-N1    | 126.8(10) | C39-C38-C43 | 118.5(12) |
| C3-C2-C1    | 115.3(10) | C33-C32-P2  | 120.2(10) |
| C87-C88-C83 | 123.3(12) | C37-C32-P2  | 120.6(9)  |
| C77-C82-C81 | 120.8(12) | C37-C32-C33 | 119.0(11) |
| C10-C9-C8   | 120.9(10) | C67-C66-C65 | 119.6(15) |
| N1-C18-P1   | 112.3(7)  | C84-C85-C86 | 117.2(15) |
| C88-C87-C86 | 114.1(14) | C40-C41-C42 | 120.7(14) |
| C50-C49-C48 | 119.5(11) | C66-C67-C68 | 119.8(17) |



C22–C21–C20

118.8(17)

Bonds to hydrogen atoms were omitted.

**Table S10.** Torsion angles for **3**.

| Atom–Atom–Atom–Atom | Torsion Angle [°] |
|---------------------|-------------------|
| Bi2–N6–C92–P4       | 0.6(6)            |
| Bi2–N6–C58–C59      | 2.0(8)            |
| Bi2–N6–C58–C57      | –176.5(8)         |
| Bi2–N5–C59–C54      | 166.4(8)          |
| Bi2–N5–C59–C58      | –23.2(8)          |
| Bi2–N5–C47–C48      | 21.3(7)           |
| Bi2–N5–C47–C52      | –165.0(7)         |
| Bi2–N4–C48–C47      | –5.7(8)           |
| Bi2–N4–C48–C49      | 174.6(7)          |
| Bi2–N4–C64–P3       | 54.3(5)           |
| Bi1–N3–C12–C11      | –175.8(7)         |
| Bi1–N3–C12–C13      | 4.6(7)            |
| Bi1–N3–C31–P2       | –53.0(5)          |
| Bi1–N1–C2–C1        | –1.6(8)           |
| Bi1–N1–C2–C3        | 178.2(7)          |
| Bi1–N1–C18–P1       | 5.9(6)            |
| Bi1–N2–C1–C2        | 21.3(7)           |
| Bi1–N2–C1–C6        | –166.2(8)         |
| Bi1–N2–C13–C12      | –19.0(7)          |
| Bi1–N2–C13–C8       | 164.3(7)          |
| P4–C92–N6–C58       | 165.9(7)          |
| P4–C83–C88–C87      | 177.2(10)         |
| P4–C83–C84–C85      | –177.0(13)        |
| P4–C77–C82–C81      | 178.0(11)         |
| P4–C77–C78–C79      | –177.9(8)         |
| P2–C31–N3–C12       | 112.4(8)          |
| P2–C38–C43–C42      | 172.7(10)         |
| P2–C38–C39–C40      | –174.9(14)        |
| P2–C32–C33–C34      | 172.8(10)         |
| P2–C32–C37–C36      | –173.3(10)        |
| P3–C64–N4–C48       | –115.2(7)         |
| P3–C71–C72–C73      | –175.3(10)        |
| P3–C71–C76–C75      | 175.8(12)         |
| P3–C65–C70–C69      | –176.6(10)        |
| P3–C65–C66–C67      | 176.7(12)         |
| P1–C25–C30–C29      | 178.7(12)         |
| P1–C25–C26–C27      | –176.2(11)        |
| P1–C19–C20–C21      | 175.0(11)         |
| P1–C19–C24–C23      | –176.0(10)        |
| P1–C18–N1–C2        | –159.9(7)         |
| N6–C58–C59–N5       | 13.5(11)          |
| N6–C58–C59–C54      | –176.5(10)        |
| N6–C58–C57–C56      | 175.9(13)         |
| N3–C12–C11–C10      | 172.6(11)         |
| N3–C12–C13–C8       | –174.2(9)         |
| N3–C12–C13–N2       | 9.0(10)           |
| N1–C2–C1–C6         | 175.5(10)         |
| N1–C2–C1–N2         | –12.4(11)         |
| N1–C2–C3–C4         | –176.9(13)        |
| N5–C59–C54–C53      | –12.4(12)         |
| N5–C59–C54–C55      | 168.9(11)         |
| N5–C59–C58–C57      | –167.8(10)        |
| N5–C47–C48–N4       | –10.0(11)         |
| N5–C47–C48–C49      | 169.7(9)          |
| N5–C47–C52–C53      | 9.8(12)           |
| N5–C47–C52–C51      | –173.2(11)        |
| N4–C48–C47–C52      | 176.5(9)          |
| N4–C48–C49–C50      | –175.2(11)        |
| C25–C30–C29–C28     | –4.1(17)          |

|                 |            |
|-----------------|------------|
| C25-C26-C27-C28 | -1.0(17)   |
| C1-C2-C3-C4     | 2.8(13)    |
| C1-C6-C7-C8     | -26.6(11)  |
| C1-C6-C7-C16    | -150.2(11) |
| C1-C6-C7-C15    | 88.6(11)   |
| C1-C6-C5-C4     | 0.2(13)    |
| C1-N2-C13-C12   | 170.1(10)  |
| C1-N2-C13-C8    | -6.5(12)   |
| C48-C47-C52-C53 | -177.0(11) |
| C48-C47-C52-C51 | -0.0(12)   |
| C48-C49-C50-C51 | -2.8(12)   |
| C48-C49-C50-C60 | 176.2(10)  |
| C12-C11-C10-C9  | 5.8(13)    |
| C12-C11-C10-C17 | -173.4(10) |
| C12-C13-C8-C7   | 174.2(9)   |
| C12-C13-C8-C9   | -2.3(12)   |
| C54-C59-C58-C57 | 2.3(12)    |
| C54-C53-C52-C47 | -22.5(11)  |
| C54-C53-C52-C51 | 160.7(10)  |
| C54-C55-C56-C57 | 0.2(15)    |
| C54-C55-C56-C63 | 179.6(13)  |
| C59-C58-C57-C56 | -2.6(13)   |
| C58-C57-C56-C55 | 1.5(14)    |
| C58-C57-C56-C63 | -177.9(12) |
| C11-C10-C9-C8   | -1.7(14)   |
| C83-C88-C87-C86 | 1.4(15)    |
| C83-C84-C85-C86 | -1.7(16)   |
| C19-C20-C21-C22 | 3.3(16)    |
| C19-C24-C23-C22 | -1.7(16)   |
| C8-C7-C6-C5     | 156.1(9)   |
| C8-C9-C10-C17   | 177.5(12)  |
| C47-C52-C53-C62 | -152.5(11) |
| C47-C52-C53-C61 | 90.5(11)   |
| C47-C52-C51-C50 | 2.7(12)    |
| C33-C34-C35-C36 | 1.5(17)    |
| C33-C32-C37-C36 | 0.7(13)    |
| C71-C72-C73-C74 | 0.5(15)    |
| C71-C76-C75-C74 | -2.0(17)   |
| C52-C51-C50-C49 | -1.3(14)   |
| C52-C51-C50-C60 | 179.6(12)  |
| C43-C42-C41-C40 | 0.4(18)    |
| C43-C38-C39-C40 | -1.1(15)   |
| C7-C6-C5-C4     | 177.7(12)  |
| C79-C78-C77-C82 | -0.0(13)   |
| C79-C80-C81-C82 | 3.0(16)    |
| C2-C3-C4-C5     | -0.2(14)   |
| C2-C3-C4-C14    | -179.9(13) |
| C72-C73-C74-C75 | -2.2(16)   |
| C65-C70-C69-C68 | 0.3(15)    |
| C65-C66-C67-C68 | -0.5(17)   |
| C6-C5-C4-C3     | -1.5(15)   |
| C6-C5-C4-C14    | 178.2(14)  |
| C70-C69-C68-C67 | -1.8(18)   |
| C76-C75-C74-C73 | 3.0(19)    |
| C20-C21-C22-C23 | -3.5(16)   |
| C37-C36-C35-C34 | -2.0(15)   |
| C39-C40-C41-C42 | -3(2)      |
| C27-C28-C29-C30 | 5(2)       |
| C69-C68-C67-C66 | 2(2)       |
| C24-C23-C22-C21 | 2.8(16)    |

Bonds to hydrogen atoms were omitted.

## Crystallographic Details of 4

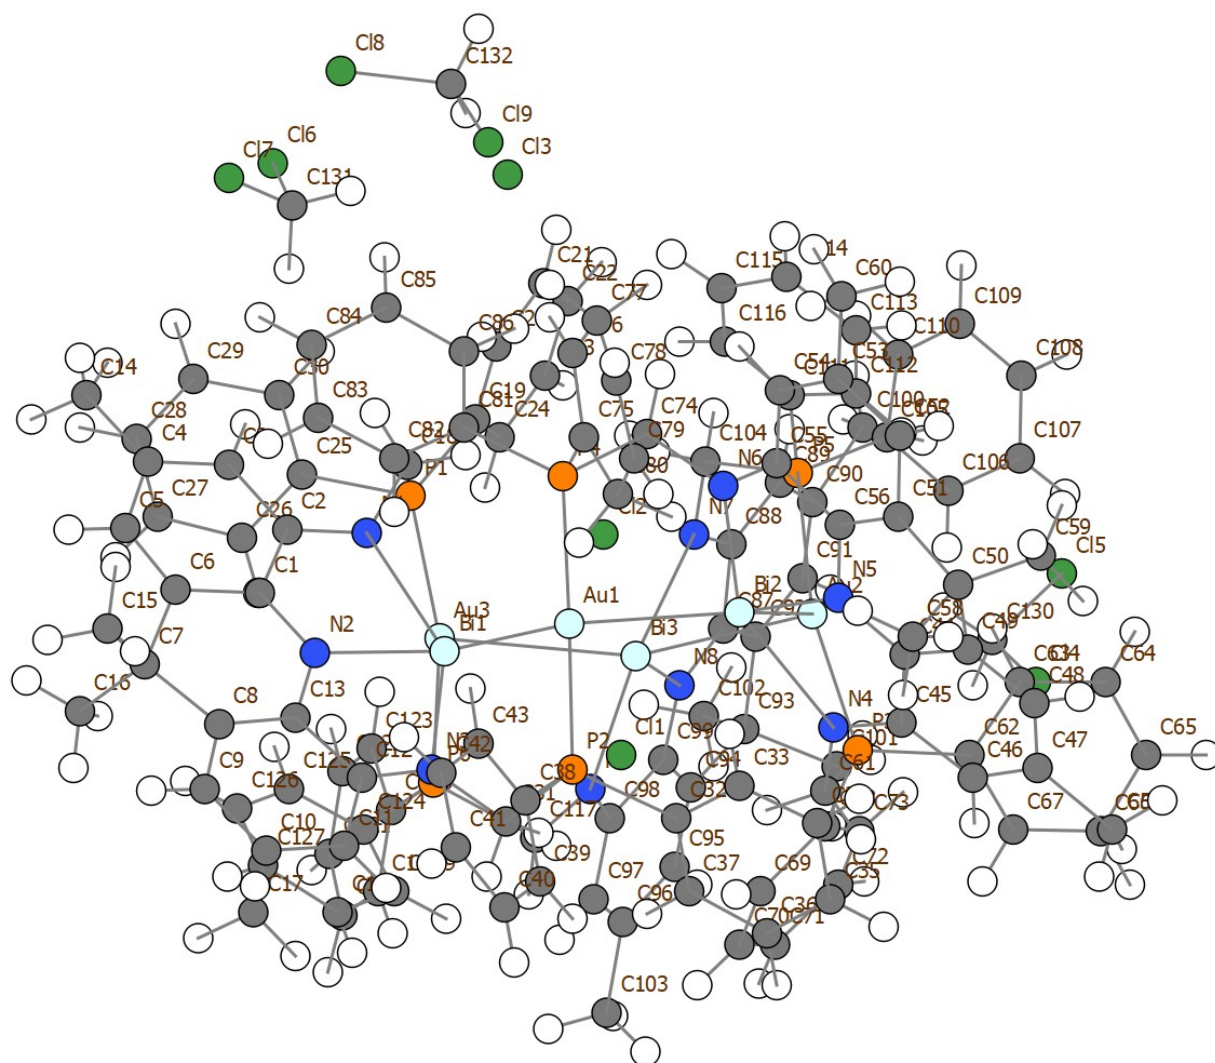

A clear dark blue, block-shaped crystal of mo\_ja23\_ja\_iii\_au20\_1\_0m\_a (**4**) was mounted on a MiTeGen micromount with perfluoroether oil. Data were collected from a shock-cooled single crystal at 100.00 K on a Bruker D8 VENTURE dual wavelength Mo/Cu three-circle diffractometer with a microfocus sealed X-ray tube using a mirror optics as monochromator and a Bruker PHOTON III detector. The diffractometer was equipped with an Oxford Cryostream 800 low temperature device and used Mo  $K_{\alpha}$  radiation ( $\lambda = 0.71073 \text{ \AA}$ ). All data were integrated with SAINT and a multi-scan absorption correction using SADABS was applied.<sup>[52,53]</sup> The structure was solved by iterative methods using olex2.solve and refined by full-matrix least-squares methods against  $F^2$  by olex2.refine using Olex2.<sup>[54]</sup> All non-hydrogen atoms were refined with anisotropic displacement parameters. All hydrogen atoms were refined isotropic on calculated positions using a riding model with their  $U_{iso}$  values constrained to 1.5 times the  $U_{eq}$  of their pivot atoms for terminal  $sp^3$  carbon atoms and 1.2 times for all other carbon atoms. Disordered moieties were refined using bond lengths restraints and displacement parameter restraints. Crystallographic data for the structures reported here have not been deposited with the Cambridge Crystallographic Data Centre.<sup>[55]</sup> Despite numerous attempts, no data set with sufficient resolution and quality could be obtained. Nevertheless, the overall connectivity of the cluster can be demonstrated and is fully in line with the other spectroscopic results. This report was generated using FinalCif.<sup>[56]</sup>

**Table S11.** Crystal data and structure refinement for mo\_ja23\_ja\_iii\_au20\_1\_0m\_a

|                                                                                     |                                                                                                                                   |
|-------------------------------------------------------------------------------------|-----------------------------------------------------------------------------------------------------------------------------------|
| CCDC number                                                                         | Not deposited                                                                                                                     |
| Empirical formula                                                                   | C <sub>281</sub> H <sub>300</sub> Au <sub>6</sub> Bi <sub>6</sub> Cl <sub>12</sub> N <sub>18</sub> O <sub>5</sub> P <sub>12</sub> |
| Formula weight                                                                      | 7242.429                                                                                                                          |
| Temperature [K]                                                                     | 100.00                                                                                                                            |
| Crystal system                                                                      | monoclinic                                                                                                                        |
| Space group (number)                                                                | <i>P</i> 2 <sub>1</sub> / <i>c</i> (14)                                                                                           |
| <i>a</i> [Å]                                                                        | 17.351(3)                                                                                                                         |
| <i>b</i> [Å]                                                                        | 30.435(5)                                                                                                                         |
| <i>c</i> [Å]                                                                        | 28.042(5)                                                                                                                         |
| $\alpha$ [°]                                                                        | 90                                                                                                                                |
| $\beta$ [°]                                                                         | 102.440(5)                                                                                                                        |
| $\gamma$ [°]                                                                        | 90                                                                                                                                |
| Volume [Å <sup>3</sup> ]                                                            | 14460(4)                                                                                                                          |
| <i>Z</i>                                                                            | 2                                                                                                                                 |
| $\rho_{\text{calc}}$ [gcm <sup>-3</sup> ]                                           | 1.663                                                                                                                             |
| $\mu$ [mm <sup>-1</sup> ]                                                           | 6.898                                                                                                                             |
| <i>F</i> (000)                                                                      | 6969.014                                                                                                                          |
| Crystal size [mm <sup>3</sup> ]                                                     | 0.365×0.144×0.144                                                                                                                 |
| Crystal colour                                                                      | clear dark blue                                                                                                                   |
| Crystal shape                                                                       | block                                                                                                                             |
| Radiation                                                                           | Mo <i>K</i> <sub><math>\alpha</math></sub> ( $\lambda$ =0.71073 Å)                                                                |
| 2 $\theta$ range [°]                                                                | 3.68 to 42.10 (0.99 Å)                                                                                                            |
| Index ranges                                                                        | -17 ≤ <i>h</i> ≤ 17<br>-30 ≤ <i>k</i> ≤ 28<br>-28 ≤ <i>l</i> ≤ 28                                                                 |
| Reflections collected                                                               | 152903                                                                                                                            |
| Independent reflections                                                             | 15340<br><i>R</i> <sub>int</sub> = 0.1302<br><i>R</i> <sub>sigma</sub> = 0.0596                                                   |
| Completeness to $\theta = 21.0485^\circ$                                            | 98.1 %                                                                                                                            |
| Data / Restraints / Parameters                                                      | 15340/8/949                                                                                                                       |
| Absorption correction<br><i>T</i> <sub>min</sub> / <i>T</i> <sub>max</sub> (method) | 0.2326/0.7446<br>(multi-scan)                                                                                                     |
| Goodness-of-fit on <i>F</i> <sup>2</sup>                                            | 1.1942                                                                                                                            |

Final *R* indexes  
[ $\geq 2\sigma(I)$ ]*R*<sub>1</sub> = 0.0799  
*wR*<sub>2</sub> = 0.1764Final *R* indexes  
[all data]*R*<sub>1</sub> = 0.1129  
*wR*<sub>2</sub> = 0.2152Largest peak/hole  
[eÅ<sup>-3</sup>]

3.23/-2.33

**Table S12.** Bond lengths and angles for mo\_ja23\_ja\_iii\_au20\_1\_0m\_a

| <b>Atom-Atom</b> | <b>Length [Å]</b> |         |         |
|------------------|-------------------|---------|---------|
| Bi1-Au1          | 3.2565(17)        | C4-C5   | 1.38(4) |
| Bi1-Au3          | 3.5389(18)        | C4-C14  | 1.48(4) |
| Bi1-N1           | 2.33(2)           | C5-C6   | 1.33(4) |
| Bi1-N2           | 2.26(2)           | C6-C7   | 1.61(4) |
| Bi1-N3           | 2.33(2)           | C7-C8   | 1.56(4) |
| Bi2-Au1          | 3.2950(17)        | C7-C15  | 1.47(3) |
| Bi2-Au2          | 3.3386(17)        | C7-C16  | 1.49(4) |
| Bi2-N4           | 2.37(2)           | C8-C9   | 1.38(4) |
| Bi2-N5           | 2.21(2)           | C8-C13  | 1.40(4) |
| Bi2-N6           | 2.28(2)           | C9-C10  | 1.45(4) |
| Bi3-Au2          | 3.2884(16)        | C10-C11 | 1.41(4) |
| Bi3-Au3          | 3.1715(16)        | C10-C17 | 1.41(4) |
| Bi3-N7           | 2.35(2)           | C11-C12 | 1.44(4) |
| Bi3-N8           | 2.27(2)           | C12-C13 | 1.46(4) |
| Bi3-N9           | 2.31(2)           | C19-C20 | 1.34(4) |
| Au1-P2           | 2.338(7)          | C19-C24 | 1.41(4) |
| Au1-P4           | 2.344(8)          | C20-C21 | 1.48(4) |
| Au2-P3           | 2.315(7)          | C21-C22 | 1.31(4) |
| Au2-P5           | 2.330(7)          | C22-C23 | 1.37(4) |
| Au3-P1           | 2.327(7)          | C23-C24 | 1.40(4) |
| Au3-P6           | 2.328(7)          | C25-C26 | 1.39(4) |
| P1-C18           | 1.92(3)           | C25-C30 | 1.38(4) |
| P1-C19           | 1.81(3)           | C26-C27 | 1.40(5) |
| P1-C25           | 1.84(3)           | C27-C28 | 1.36(5) |
| P2-C31           | 1.83(2)           | C28-C29 | 1.31(5) |
| P2-C32           | 1.81(3)           | C29-C30 | 1.39(4) |
| P2-C38           | 1.89(4)           | C32-C33 | 1.38(4) |
| P3-C61           | 1.88(3)           | C32-C37 | 1.36(4) |
| P3-C62           | 1.79(3)           | C33-C34 | 1.38(4) |
| P3-C68           | 1.77(3)           | C34-C35 | 1.45(4) |
| P4-C74           | 1.86(3)           | C35-C36 | 1.36(4) |
| P4-C75           | 1.78(3)           | C36-C37 | 1.42(4) |
| P4-C81           | 1.81(3)           | C38-C39 | 1.38(5) |
| P5-C104          | 1.83(3)           | C38-C43 | 1.35(5) |
| P5-C105          | 1.81(3)           | C39-C40 | 1.35(5) |
| P5-C111          | 1.78(3)           | C40-C41 | 1.42(5) |
| P6-C117          | 1.84(3)           | C41-C42 | 1.28(5) |
| P6-C118          | 1.84(3)           | C42-C43 | 1.42(5) |
| P6-C124          | 1.87(4)           | C44-C45 | 1.45(4) |
| N1-C2            | 1.31(3)           | C44-C49 | 1.40(4) |
| N1-C18           | 1.48(4)           | C45-C46 | 1.44(4) |
| N2-C1            | 1.35(3)           | C46-C47 | 1.32(4) |
| N2-C13           | 1.39(3)           | C47-C48 | 1.44(4) |
| N3-C12           | 1.34(3)           | C47-C57 | 1.52(4) |
| N3-C31           | 1.47(3)           | C48-C49 | 1.36(4) |
| N4-C45           | 1.32(3)           | C49-C50 | 1.52(4) |
| N4-C61           | 1.40(3)           | C50-C51 | 1.47(4) |
| N5-C44           | 1.38(3)           | C50-C58 | 1.63(3) |
| N5-C56           | 1.40(3)           | C50-C59 | 1.54(4) |
| N6-C55           | 1.35(3)           | C51-C52 | 1.52(4) |
| N6-C74           | 1.48(3)           | C51-C56 | 1.39(4) |
| N7-C88           | 1.34(3)           | C52-C53 | 1.40(4) |
| N7-C104          | 1.42(3)           | C53-C54 | 1.31(4) |
| N8-C87           | 1.35(3)           | C53-C60 | 1.61(4) |
| N8-C99           | 1.34(3)           | C54-C55 | 1.41(4) |
| N9-C98           | 1.36(3)           | C55-C56 | 1.43(4) |
| N9-C117          | 1.38(3)           | C62-C63 | 1.41(4) |
| C1-C2            | 1.38(4)           | C62-C67 | 1.37(4) |
| C1-C6            | 1.45(4)           | C63-C64 | 1.36(4) |
| C2-C3            | 1.45(4)           | C64-C65 | 1.32(4) |
| C3-C4            | 1.42(4)           | C65-C66 | 1.42(4) |
|                  |                   | C66-C67 | 1.41(4) |

|           |         |                       |                  |
|-----------|---------|-----------------------|------------------|
| C68–C69   | 1.48(4) | C131–Cl7              | 1.70(6)          |
| C68–C73   | 1.39(4) | C132–Cl8              | 1.78(5)          |
| C69–C70   | 1.35(4) | C132–Cl9              | 1.77(6)          |
| C70–C71   | 1.38(5) |                       |                  |
| C71–C72   | 1.41(5) | <b>Atom–Atom–Atom</b> | <b>Angle [°]</b> |
| C72–C73   | 1.29(4) | Au3–Bi1–Au1           | 141.76(5)        |
| C75–C76   | 1.37(4) | N1–Bi1–Au1            | 114.6(5)         |
| C75–C80   | 1.48(4) | N1–Bi1–Au3            | 71.5(5)          |
| C76–C77   | 1.45(4) | N2–Bi1–Au1            | 103.3(5)         |
| C77–C78   | 1.45(5) | N2–Bi1–Au3            | 113.3(6)         |
| C78–C79   | 1.30(4) | N2–Bi1–N1             | 68.3(8)          |
| C79–C80   | 1.47(4) | N3–Bi1–Au1            | 72.9(5)          |
| C81–C82   | 1.31(4) | N3–Bi1–Au3            | 129.0(5)         |
| C81–C86   | 1.40(4) | N3–Bi1–N1             | 139.0(8)         |
| C82–C83   | 1.40(4) | N3–Bi1–N2             | 70.7(8)          |
| C83–C84   | 1.30(4) | Au2–Bi2–Au1           | 145.01(5)        |
| C84–C85   | 1.44(4) | N4–Bi2–Au1            | 120.5(5)         |
| C85–C86   | 1.44(4) | N4–Bi2–Au2            | 74.5(5)          |
| C87–C88   | 1.52(4) | N5–Bi2–Au1            | 101.8(6)         |
| C87–C92   | 1.35(4) | N5–Bi2–Au2            | 113.2(6)         |
| C88–C89   | 1.46(4) | N5–Bi2–N4             | 69.8(8)          |
| C89–C90   | 1.32(4) | N6–Bi2–Au1            | 71.9(6)          |
| C90–C91   | 1.35(4) | N6–Bi2–Au2            | 118.6(6)         |
| C90–C100  | 1.59(4) | N6–Bi2–N4             | 140.3(7)         |
| C91–C92   | 1.33(4) | N6–Bi2–N5             | 70.6(8)          |
| C92–C93   | 1.61(4) | Au3–Bi3–Au2           | 138.45(5)        |
| C93–C94   | 1.50(4) | N7–Bi3–Au2            | 71.2(5)          |
| C93–C101  | 1.60(4) | N7–Bi3–Au3            | 112.0(5)         |
| C93–C102  | 1.63(4) | N8–Bi3–Au2            | 102.8(5)         |
| C94–C95   | 1.38(4) | N8–Bi3–Au3            | 117.6(5)         |
| C94–C99   | 1.37(4) | N8–Bi3–N7             | 71.1(8)          |
| C95–C96   | 1.39(4) | N9–Bi3–Au2            | 125.4(5)         |
| C96–C97   | 1.32(4) | N9–Bi3–Au3            | 79.3(5)          |
| C96–C103  | 1.54(4) | N9–Bi3–N7             | 141.4(8)         |
| C97–C98   | 1.47(4) | N9–Bi3–N8             | 71.1(8)          |
| C98–C99   | 1.50(4) | Bi2–Au1–Bi1           | 93.58(4)         |
| C105–C106 | 1.33(5) | P2–Au1–Bi1            | 89.79(19)        |
| C105–C110 | 1.37(5) | P2–Au1–Bi2            | 96.87(19)        |
| C106–C107 | 1.45(4) | P4–Au1–Bi1            | 97.8(2)          |
| C107–C108 | 1.34(5) | P4–Au1–Bi2            | 90.1(2)          |
| C108–C109 | 1.35(5) | P4–Au1–P2             | 169.4(3)         |
| C109–C110 | 1.29(4) | Bi3–Au2–Bi2           | 98.51(4)         |
| C111–C112 | 1.42(4) | P3–Au2–Bi2            | 87.85(19)        |
| C111–C116 | 1.36(4) | P3–Au2–Bi3            | 98.36(18)        |
| C112–C113 | 1.44(4) | P5–Au2–Bi2            | 101.99(19)       |
| C113–C114 | 1.38(4) | P5–Au2–Bi3            | 89.29(18)        |
| C114–C115 | 1.41(4) | P5–Au2–P3             | 166.6(3)         |
| C115–C116 | 1.32(4) | Bi3–Au3–Bi1           | 97.28(4)         |
| C118–C119 | 1.35(4) | P1–Au3–Bi1            | 85.7(2)          |
| C118–C123 | 1.38(4) | P1–Au3–Bi3            | 108.23(18)       |
| C119–C120 | 1.38(4) | P6–Au3–Bi1            | 94.1(2)          |
| C120–C121 | 1.38(4) | P6–Au3–Bi3            | 86.02(19)        |
| C121–C122 | 1.37(4) | P6–Au3–P1             | 165.7(3)         |
| C122–C123 | 1.33(4) | C18–P1–Au3            | 112.9(10)        |
| C124–C125 | 1.34(5) | C19–P1–Au3            | 118.6(9)         |
| C124–C129 | 1.35(5) | C19–P1–C18            | 105.4(14)        |
| C125–C126 | 1.37(5) | C25–P1–Au3            | 109.4(10)        |
| C126–C127 | 1.36(5) | C25–P1–C18            | 103.4(13)        |
| C127–C128 | 1.40(5) | C25–P1–C19            | 105.9(13)        |
| C128–C129 | 1.53(5) | C31–P2–Au1            | 109.8(8)         |
| C130–Cl4  | 1.62(6) | C32–P2–Au1            | 116.3(9)         |
| C130–Cl5  | 1.79(5) | C32–P2–C31            | 109.3(11)        |
| C131–Cl6  | 1.74(6) | C38–P2–Au1            | 112.4(11)        |

|              |           |             |           |
|--------------|-----------|-------------|-----------|
| C38-P2-C31   | 103.9(13) | C6-C5-C4    | 127(3)    |
| C38-P2-C32   | 104.4(14) | C5-C6-C1    | 117(3)    |
| C61-P3-Au2   | 112.3(9)  | C7-C6-C1    | 120(2)    |
| C62-P3-Au2   | 110.3(10) | C7-C6-C5    | 123(3)    |
| C62-P3-C61   | 105.6(14) | C8-C7-C6    | 111(2)    |
| C68-P3-Au2   | 116.5(10) | C15-C7-C6   | 108(2)    |
| C68-P3-C61   | 106.9(13) | C15-C7-C8   | 111(2)    |
| C68-P3-C62   | 104.5(14) | C16-C7-C6   | 107(2)    |
| C74-P4-Au1   | 108.5(9)  | C16-C7-C8   | 110(2)    |
| C75-P4-Au1   | 112.3(11) | C16-C7-C15  | 110(2)    |
| C75-P4-C74   | 106.1(14) | C9-C8-C7    | 118(2)    |
| C81-P4-Au1   | 117.8(11) | C13-C8-C7   | 120(3)    |
| C81-P4-C74   | 108.7(15) | C13-C8-C9   | 122(3)    |
| C81-P4-C75   | 102.7(15) | C10-C9-C8   | 122(3)    |
| C104-P5-Au2  | 109.5(9)  | C11-C10-C9  | 117(3)    |
| C105-P5-Au2  | 111.0(13) | C17-C10-C9  | 121(3)    |
| C105-P5-C104 | 106.3(15) | C17-C10-C11 | 122(3)    |
| C111-P5-Au2  | 118.6(11) | C12-C11-C10 | 122(3)    |
| C111-P5-C104 | 107.5(14) | C11-C12-N3  | 127(3)    |
| C111-P5-C105 | 103.1(15) | C13-C12-N3  | 115(3)    |
| C117-P6-Au3  | 115.8(9)  | C13-C12-C11 | 118(3)    |
| C118-P6-Au3  | 111.1(10) | C8-C13-N2   | 124(3)    |
| C118-P6-C117 | 101.1(13) | C12-C13-N2  | 117(2)    |
| C124-P6-Au3  | 109.2(13) | C12-C13-C8  | 119(3)    |
| C124-P6-C117 | 110.5(17) | N1-C18-P1   | 108.6(19) |
| C124-P6-C118 | 108.7(15) | C20-C19-P1  | 122(2)    |
| C2-N1-Bi1    | 118.5(19) | C24-C19-P1  | 116(2)    |
| C18-N1-Bi1   | 119.7(18) | C24-C19-C20 | 121(3)    |
| C18-N1-C2    | 122(2)    | C21-C20-C19 | 120(3)    |
| C1-N2-Bi1    | 119.4(18) | C22-C21-C20 | 118(3)    |
| C13-N2-Bi1   | 118.4(17) | C23-C22-C21 | 123(3)    |
| C13-N2-C1    | 122(2)    | C24-C23-C22 | 120(3)    |
| C12-N3-Bi1   | 118.7(18) | C23-C24-C19 | 118(3)    |
| C31-N3-Bi1   | 120.5(16) | C26-C25-P1  | 117(2)    |
| C31-N3-C12   | 119(2)    | C30-C25-P1  | 121(2)    |
| C45-N4-Bi2   | 116.7(17) | C30-C25-C26 | 121(3)    |
| C61-N4-Bi2   | 121.4(17) | C27-C26-C25 | 118(3)    |
| C61-N4-C45   | 121(2)    | C28-C27-C26 | 120(3)    |
| C44-N5-Bi2   | 121.6(17) | C29-C28-C27 | 121(3)    |
| C56-N5-Bi2   | 118.8(18) | C30-C29-C28 | 122(3)    |
| C56-N5-C44   | 119(2)    | C29-C30-C25 | 117(3)    |
| C55-N6-Bi2   | 120.0(18) | N3-C31-P2   | 110.2(16) |
| C74-N6-Bi2   | 122.3(16) | C33-C32-P2  | 120(2)    |
| C74-N6-C55   | 117(2)    | C37-C32-P2  | 121(2)    |
| C88-N7-Bi3   | 115.5(18) | C37-C32-C33 | 118(3)    |
| C104-N7-Bi3  | 120.5(17) | C34-C33-C32 | 125(3)    |
| C104-N7-C88  | 122(2)    | C35-C34-C33 | 115(3)    |
| C87-N8-Bi3   | 121.5(18) | C36-C35-C34 | 121(3)    |
| C99-N8-Bi3   | 120.1(18) | C37-C36-C35 | 119(3)    |
| C99-N8-C87   | 118(2)    | C36-C37-C32 | 121(3)    |
| C98-N9-Bi3   | 117.9(18) | C39-C38-P2  | 116(3)    |
| C117-N9-Bi3  | 125.2(17) | C43-C38-P2  | 118(3)    |
| C117-N9-C98  | 116(2)    | C43-C38-C39 | 125(4)    |
| C2-C1-N2     | 117(3)    | C40-C39-C38 | 118(4)    |
| C6-C1-N2     | 122(3)    | C41-C40-C39 | 116(4)    |
| C6-C1-C2     | 121(3)    | C42-C41-C40 | 125(4)    |
| C1-C2-N1     | 116(3)    | C43-C42-C41 | 119(4)    |
| C3-C2-N1     | 125(3)    | C42-C43-C38 | 115(4)    |
| C3-C2-C1     | 119(3)    | C45-C44-N5  | 114(2)    |
| C4-C3-C2     | 120(3)    | C49-C44-N5  | 124(3)    |
| C5-C4-C3     | 117(3)    | C49-C44-C45 | 121(3)    |
| C14-C4-C3    | 122(3)    | C44-C45-N4  | 117(3)    |
| C14-C4-C5    | 121(3)    | C46-C45-N4  | 129(3)    |

|             |           |                |           |
|-------------|-----------|----------------|-----------|
| C46-C45-C44 | 114(3)    | C88-C87-N8     | 112(2)    |
| C47-C46-C45 | 125(3)    | C92-C87-N8     | 129(3)    |
| C48-C47-C46 | 118(3)    | C92-C87-C88    | 119(3)    |
| C57-C47-C46 | 122(3)    | C87-C88-N7     | 119(2)    |
| C57-C47-C48 | 120(3)    | C89-C88-N7     | 128(3)    |
| C49-C48-C47 | 121(3)    | C89-C88-C87    | 113(2)    |
| C48-C49-C44 | 120(3)    | C90-C89-C88    | 121(3)    |
| C50-C49-C44 | 118(3)    | C91-C90-C89    | 123(3)    |
| C50-C49-C48 | 123(3)    | C100-C90-C89   | 114(3)    |
| C51-C50-C49 | 112(2)    | C100-C90-C91   | 123(3)    |
| C58-C50-C49 | 103(2)    | C92-C91-C90    | 121(3)    |
| C58-C50-C51 | 106(2)    | C91-C92-C87    | 123(3)    |
| C59-C50-C49 | 114(2)    | C93-C92-C87    | 114(3)    |
| C59-C50-C51 | 116(2)    | C93-C92-C91    | 122(3)    |
| C59-C50-C58 | 104(2)    | C94-C93-C92    | 114(2)    |
| C52-C51-C50 | 118(2)    | C101-C93-C92   | 108(2)    |
| C56-C51-C50 | 124(3)    | C101-C93-C94   | 113(3)    |
| C56-C51-C52 | 118(3)    | C102-C93-C92   | 106(2)    |
| C53-C52-C51 | 114(3)    | C102-C93-C94   | 110(2)    |
| C54-C53-C52 | 127(3)    | C102-C93-C101  | 105(2)    |
| C60-C53-C52 | 111(2)    | C95-C94-C93    | 120(3)    |
| C60-C53-C54 | 122(3)    | C99-C94-C93    | 119(3)    |
| C55-C54-C53 | 122(3)    | C99-C94-C95    | 121(3)    |
| C54-C55-N6  | 131(3)    | C96-C95-C94    | 122(3)    |
| C56-C55-N6  | 114(2)    | C97-C96-C95    | 119(3)    |
| C56-C55-C54 | 116(3)    | C103-C96-C95   | 123(3)    |
| C51-C56-N5  | 119(3)    | C103-C96-C97   | 118(3)    |
| C55-C56-N5  | 117(2)    | C98-C97-C96    | 125(3)    |
| C55-C56-C51 | 124(3)    | C97-C98-N9     | 131(3)    |
| N4-C61-P3   | 110.3(18) | C99-C98-N9     | 115(2)    |
| C63-C62-P3  | 122(2)    | C99-C98-C97    | 114(2)    |
| C67-C62-P3  | 123(2)    | C94-C99-N8     | 125(3)    |
| C67-C62-C63 | 115(3)    | C98-C99-N8     | 116(2)    |
| C64-C63-C62 | 125(3)    | C98-C99-C94    | 119(3)    |
| C65-C64-C63 | 120(3)    | N7-C104-P5     | 110.8(19) |
| C66-C65-C64 | 120(3)    | C106-C105-P5   | 122(3)    |
| C67-C66-C65 | 119(3)    | C110-C105-P5   | 122(3)    |
| C66-C67-C62 | 122(3)    | C110-C105-C106 | 117(3)    |
| C69-C68-P3  | 123(2)    | C107-C106-C105 | 119(3)    |
| C73-C68-P3  | 123(2)    | C108-C107-C106 | 119(4)    |
| C73-C68-C69 | 114(2)    | C109-C108-C107 | 120(4)    |
| C70-C69-C68 | 118(3)    | C110-C109-C108 | 119(4)    |
| C71-C70-C69 | 124(3)    | C109-C110-C105 | 126(4)    |
| C72-C71-C70 | 117(3)    | C112-C111-P5   | 116(2)    |
| C73-C72-C71 | 120(4)    | C116-C111-P5   | 126(3)    |
| C72-C73-C68 | 126(3)    | C116-C111-C112 | 118(3)    |
| N6-C74-P4   | 107.5(18) | C113-C112-C111 | 119(3)    |
| C76-C75-P4  | 120(2)    | C114-C113-C112 | 120(3)    |
| C80-C75-P4  | 119(2)    | C115-C114-C113 | 117(3)    |
| C80-C75-C76 | 120(3)    | C116-C115-C114 | 123(3)    |
| C77-C76-C75 | 119(3)    | C115-C116-C111 | 123(3)    |
| C78-C77-C76 | 118(3)    | N9-C117-P6     | 107.5(19) |
| C79-C78-C77 | 122(3)    | C119-C118-P6   | 118(2)    |
| C80-C79-C78 | 120(3)    | C123-C118-P6   | 122(2)    |
| C79-C80-C75 | 118(3)    | C123-C118-C119 | 120(3)    |
| C82-C81-P4  | 120(3)    | C120-C119-C118 | 121(3)    |
| C86-C81-P4  | 120(3)    | C121-C120-C119 | 118(3)    |
| C86-C81-C82 | 120(3)    | C122-C121-C120 | 120(3)    |
| C83-C82-C81 | 121(3)    | C123-C122-C121 | 121(3)    |
| C84-C83-C82 | 123(4)    | C122-C123-C118 | 120(3)    |
| C85-C84-C83 | 119(3)    | C125-C124-P6   | 112(3)    |
| C86-C85-C84 | 116(3)    | C129-C124-P6   | 118(3)    |
| C85-C86-C81 | 120(3)    | C129-C124-C125 | 129(4)    |



|                |        |                                       |        |
|----------------|--------|---------------------------------------|--------|
| C126–C125–C124 | 118(4) | C15–C130–C14                          | 114(3) |
| C127–C126–C125 | 120(4) | C17–C131–C16                          | 118(3) |
| C128–C127–C126 | 124(4) | C19–C132–C18                          | 111(3) |
| C129–C128–C127 | 116(4) | Bonds to hydrogen atoms were omitted. |        |
| C128–C129–C124 | 113(4) |                                       |        |

**Table S13.** Torsion angles for mo\_ja23\_ja\_iii\_au20\_1\_0m\_a

| Atom–Atom–Atom–Atom | Torsion Angle [°] |                   |         |
|---------------------|-------------------|-------------------|---------|
| Bi1–N1–C2–C1        | 5(2)              | P6–C118–C119–C120 | 177(2)  |
| Bi1–N1–C2–C3        | –172.8(18)        | P6–C118–C123–C122 | 179(2)  |
| Bi1–N1–C18–P1       | 80.8(15)          | P6–C124–C125–C126 | –170(3) |
| Bi1–N2–C1–C2        | –4(2)             | P6–C124–C129–C128 | 168(3)  |
| Bi1–N2–C1–C6        | –179.7(19)        | N1–C2–C1–N2       | –1(3)   |
| Bi1–N2–C13–C8       | 179.2(19)         | N1–C2–C1–C6       | 175(2)  |
| Bi1–N2–C13–C12      | 1.5(19)           | N1–C2–C3–C4       | –175(3) |
| Bi1–N3–C12–C11      | –178.8(18)        | N2–C1–C2–C3       | 177(2)  |
| Bi1–N3–C12–C13      | 8.9(19)           | N2–C1–C6–C5       | –178(3) |
| Bi1–N3–C31–P2       | 75.5(14)          | N2–C1–C6–C7       | –6(3)   |
| Bi2–N4–C45–C44      | 8(2)              | N2–C13–C8–C7      | 7(3)    |
| Bi2–N4–C45–C46      | –173.1(18)        | N2–C13–C8–C9      | –178(3) |
| Bi2–N4–C61–P3       | 73.2(15)          | N2–C13–C12–N3     | –7(3)   |
| Bi2–N5–C44–C45      | 0(2)              | N2–C13–C12–C11    | –180(2) |
| Bi2–N5–C44–C49      | –178(2)           | N3–C12–C11–C10    | –176(3) |
| Bi2–N5–C56–C51      | 177(2)            | N3–C12–C13–C8     | 175(2)  |
| Bi2–N5–C56–C55      | –4(2)             | N4–C45–C44–N5     | –6(3)   |
| Bi2–N6–C55–C54      | 179.3(19)         | N4–C45–C44–C49    | 172(3)  |
| Bi2–N6–C55–C56      | –2(2)             | N4–C45–C46–C47    | –179(3) |
| Bi2–N6–C74–P4       | 80.6(15)          | N5–C44–C45–C46    | 175(2)  |
| Bi3–N7–C88–C87      | 8(2)              | N5–C44–C49–C48    | –173(3) |
| Bi3–N7–C88–C89      | –173.1(19)        | N5–C44–C49–C50    | 8(3)    |
| Bi3–N7–C104–P5      | 76.9(15)          | N5–C56–C51–C50    | –7(3)   |
| Bi3–N8–C87–C88      | –5(2)             | N5–C56–C51–C52    | 177(2)  |
| Bi3–N8–C87–C92      | 177(2)            | N5–C56–C55–N6     | 4(3)    |
| Bi3–N8–C99–C94      | –176(2)           | N5–C56–C55–C54    | –178(3) |
| Bi3–N8–C99–C98      | 5(2)              | N6–C55–C54–C53    | 179(3)  |
| Bi3–N9–C98–C97      | 177(2)            | N6–C55–C56–C51    | –177(2) |
| Bi3–N9–C98–C99      | 3(2)              | N7–C88–C87–N8     | –2(3)   |
| Bi3–N9–C117–P6      | 64.4(16)          | N7–C88–C87–C92    | 177(3)  |
| P1–C18–N1–C2        | –101(2)           | N7–C88–C89–C90    | –179(3) |
| P1–C19–C20–C21      | –174(2)           | N8–C87–C88–C89    | 178(3)  |
| P1–C19–C24–C23      | 176(2)            | N8–C87–C92–C91    | –175(3) |
| P1–C25–C26–C27      | 168(3)            | N8–C87–C92–C93    | –3(4)   |
| P1–C25–C30–C29      | –169(3)           | N8–C99–C94–C93    | 1(4)    |
| P2–C31–N3–C12       | –89(2)            | N8–C99–C94–C95    | 178(3)  |
| P2–C32–C33–C34      | 174(2)            | N8–C99–C98–N9     | –5(3)   |
| P2–C32–C37–C36      | –174(2)           | N8–C99–C98–C97    | –180(3) |
| P2–C38–C39–C40      | –178(3)           | N9–C98–C97–C96    | –174(3) |
| P2–C38–C43–C42      | 176(3)            | N9–C98–C99–C94    | 176(3)  |
| P3–C61–N4–C45       | –98(2)            | C1–C2–C3–C4       | 7(3)    |
| P3–C62–C63–C64      | –178(3)           | C1–C6–C5–C4       | –7(3)   |
| P3–C62–C67–C66      | 177(2)            | C1–C6–C7–C8       | 11(3)   |
| P3–C68–C69–C70      | 179(3)            | C1–C6–C7–C15      | 132(3)  |
| P3–C68–C73–C72      | –179(3)           | C1–C6–C7–C16      | –109(3) |
| P4–C74–N6–C55       | –90(2)            | C2–C3–C4–C5       | –7(3)   |
| P4–C75–C76–C77      | –174(3)           | C2–C3–C4–C14      | 176(3)  |
| P4–C75–C80–C79      | 180(3)            | C3–C4–C5–C6       | 7(3)    |
| P4–C81–C82–C83      | 174(2)            | C4–C5–C6–C7       | –178(3) |
| P4–C81–C86–C85      | –174(2)           | C5–C6–C7–C8       | –178(3) |
| P5–C104–N7–C88      | –88(2)            | C5–C6–C7–C15      | –57(3)  |
| P5–C105–C106–C107   | –178(3)           | C5–C6–C7–C16      | 62(3)   |
| P5–C105–C110–C109   | 180(3)            | C6–C7–C8–C9       | 174(2)  |
| P5–C111–C112–C113   | 178(2)            | C6–C7–C8–C13      | –11(2)  |
| P5–C111–C116–C115   | 177(3)            | C7–C8–C9–C10      | 174(2)  |
| P6–C117–N9–C98      | –107(2)           | C7–C8–C13–C12     | –175(2) |
|                     |                   | C8–C9–C10–C11     | –1(3)   |

|                 |         |                     |         |
|-----------------|---------|---------------------|---------|
| C8-C9-C10-C17   | 176(3)  | C70-C71-C72-C73     | 0(4)    |
| C8-C13-C12-C11  | 2(3)    | C75-C76-C77-C78     | -12(4)  |
| C9-C10-C11-C12  | 4(3)    | C75-C80-C79-C78     | 2(4)    |
| C10-C11-C12-C13 | -4(3)   | C76-C77-C78-C79     | 19(5)   |
| C19-C20-C21-C22 | -3(3)   | C77-C78-C79-C80     | -14(5)  |
| C19-C24-C23-C22 | 0(3)    | C81-C82-C83-C84     | -2(4)   |
| C20-C21-C22-C23 | 4(3)    | C81-C86-C85-C84     | 2(4)    |
| C21-C22-C23-C24 | -3(4)   | C82-C83-C84-C85     | 5(4)    |
| C25-C26-C27-C28 | 5(4)    | C83-C84-C85-C86     | -5(4)   |
| C25-C30-C29-C28 | -3(4)   | C87-C88-C89-C90     | 0(3)    |
| C26-C27-C28-C29 | -9(5)   | C87-C92-C91-C90     | -8(4)   |
| C27-C28-C29-C30 | 8(5)    | C87-C92-C93-C94     | 7(3)    |
| C32-C33-C34-C35 | 2(3)    | C87-C92-C93-C101    | -120(3) |
| C32-C37-C36-C35 | -1(4)   | C87-C92-C93-C102    | 129(3)  |
| C33-C34-C35-C36 | -3(3)   | C88-C89-C90-C91     | -1(4)   |
| C34-C35-C36-C37 | 2(3)    | C88-C89-C90-C100    | 180(3)  |
| C38-C39-C40-C41 | 1(4)    | C89-C90-C91-C92     | 5(4)    |
| C38-C43-C42-C41 | 3(4)    | C90-C91-C92-C93     | -179(3) |
| C39-C40-C41-C42 | 1(4)    | C91-C92-C93-C94     | 179(3)  |
| C40-C41-C42-C43 | -3(4)   | C91-C92-C93-C101    | 52(3)   |
| C44-C45-C46-C47 | -1(3)   | C91-C92-C93-C102    | -59(3)  |
| C44-C49-C48-C47 | -5(3)   | C92-C93-C94-C95     | 177(3)  |
| C44-C49-C50-C51 | -21(3)  | C92-C93-C94-C99     | -6(3)   |
| C44-C49-C50-C58 | 93(3)   | C93-C94-C95-C96     | -179(3) |
| C44-C49-C50-C59 | -155(3) | C93-C94-C99-C98     | -179(3) |
| C45-C46-C47-C48 | 4(3)    | C94-C95-C96-C97     | -4(4)   |
| C45-C46-C47-C57 | -179(3) | C94-C95-C96-C103    | -178(3) |
| C46-C47-C48-C49 | -2(3)   | C94-C99-C98-C97     | 1(3)    |
| C47-C48-C49-C50 | 174(2)  | C95-C96-C97-C98     | 2(4)    |
| C48-C49-C50-C51 | 160(3)  | C96-C97-C98-C99     | 0(4)    |
| C48-C49-C50-C58 | -86(3)  | C105-C106-C107-C108 | 0(4)    |
| C48-C49-C50-C59 | 26(3)   | C105-C110-C109-C108 | -2(4)   |
| C49-C50-C51-C52 | -163(2) | C106-C107-C108-C109 | 3(4)    |
| C49-C50-C51-C56 | 20(3)   | C107-C108-C109-C110 | -2(4)   |
| C50-C51-C52-C53 | -176(3) | C111-C112-C113-C114 | 4(3)    |
| C50-C51-C56-C55 | 174(3)  | C111-C116-C115-C114 | 5(4)    |
| C51-C52-C53-C54 | 3(3)    | C112-C113-C114-C115 | 0(3)    |
| C51-C52-C53-C60 | 179(2)  | C113-C114-C115-C116 | -4(4)   |
| C51-C56-C55-C54 | 2(3)    | C118-C119-C120-C121 | 7(3)    |
| C52-C53-C54-C55 | -3(4)   | C118-C123-C122-C121 | 1(3)    |
| C53-C54-C55-C56 | 1(3)    | C119-C120-C121-C122 | -7(3)   |
| C62-C63-C64-C65 | 3(4)    | C120-C121-C122-C123 | 3(4)    |
| C62-C67-C66-C65 | -1(3)   | C124-C125-C126-C127 | 1(4)    |
| C63-C64-C65-C66 | -2(4)   | C124-C129-C128-C127 | 1(4)    |
| C64-C65-C66-C67 | 1(4)    | C125-C126-C127-C128 | -3(4)   |
| C68-C69-C70-C71 | 2(4)    | C126-C127-C128-C129 | 2(4)    |
| C68-C73-C72-C71 | -2(4)   |                     |         |
| C69-C70-C71-C72 | 0(4)    |                     |         |

Bonds to hydrogen atoms were omitted.

## X-ray Absorption Near Edge Structure (XANES) spectroscopy

XANES measurements were performed in transmission at the Bi  $L_1$ -edge (16388 eV) and Bi  $L_3$ -edge (13419 eV) at the BAMline, located at BESSY II (Berlin, Germany).<sup>[57]</sup> The incident energy was tuned by a double crystal monochromator in a Si(111) arrangement ( $\Delta E/E = 2 \times 10^{-4}$ ). Two ionization chambers were used to measure the I0 signal (before the sample) and the I1 signal (after the sample). For I0 and I1 a 5 cm and 15 cm long chamber was used, respectively. The chambers were filled with Ar. The beam size was 4 mm (horizontal) x 2 mm (vertical). The measurement protocol was the following: 10 eV steps until 20 eV before the edge, followed by 0.5 eV steps until 20 eV above the edge and 2 eV steps until 200 eV above the edge. From then on equidistant k-steps were taken (every 2.4 Å) until 14 Å.

The data evaluation and treatment were performed by using the ATHENA program from the DEMETER package.<sup>[58]</sup> The Bi-foil was used to calibrate the energy delivered by the Si(111) monochromator. All spectra were normalized to the pre-edge (linear function) and post-edge (a degree 3 polynomial function).

Bismuth has a ground state electron configuration of  $[\text{Xe}] 4f^{14}5d^{10}6s^26p^3$ . For lower oxidation states (until 3+) the 6p orbitals are of interest, and as such absorption transitions between  $2s \rightarrow 6p$  are relevant, which can be probed by Bi  $L_1$ -edge. For higher oxidation states, dipole allows  $2p_{2/3} \rightarrow 6s$  or  $5d$ , which can be probed by Bi  $L_3$ -edge.<sup>[59]</sup> In the case of Bi  $L_1$ -edge, the higher the oxidation state the higher the energy is to promote  $2s$  electrons into empty  $6p$  orbitals, which translates into a higher absorption edge energy in the XANES spectra (Figure 2 / Figure S34). Bi  $L_1$  transitions have a sharper maximum than the Bi  $L_3$  transitions. This is because in the former transitions are more localized (only to unoccupied  $6p$  states), while in the latter this is delocalized (to both unoccupied  $6s$  and  $5d$  states). Since these samples show a maximum oxidation of 3+, Bi  $L_3$ -edge (Figure S36) was less sensitive to the shift than the Bi  $L_1$ -edge (Figure S34). Nevertheless, the Bi  $L_3$ -edge XANES spectra reveal that the coordination environment is different between **2** and BiPh<sub>3</sub>. BiPh<sub>3</sub> has a shoulder at lower energy (13412.3 eV), which is stronger than the main absorption edge (at 13418 eV), where the edge of **2** falls. Both the oxidation state and the bond length affect the energy shift. In coordination environments that promote a strong hybridization of the  $6s$  and  $5d$  orbitals, and additional orbitals ( $p$  and  $f$ ), the pre-edge peak becomes noticeable. This is the case of BiPh<sub>3</sub>, which results in the shoulder at the edge in Figure S36.

Another important conclusion is the inferring about the stability of the **2** sample. As such we probed the Bi  $L_1$ -edge after 1 h and the difference spectrum demonstrating the stability of the sample over the course of data acquisition is shown in Figure S35.

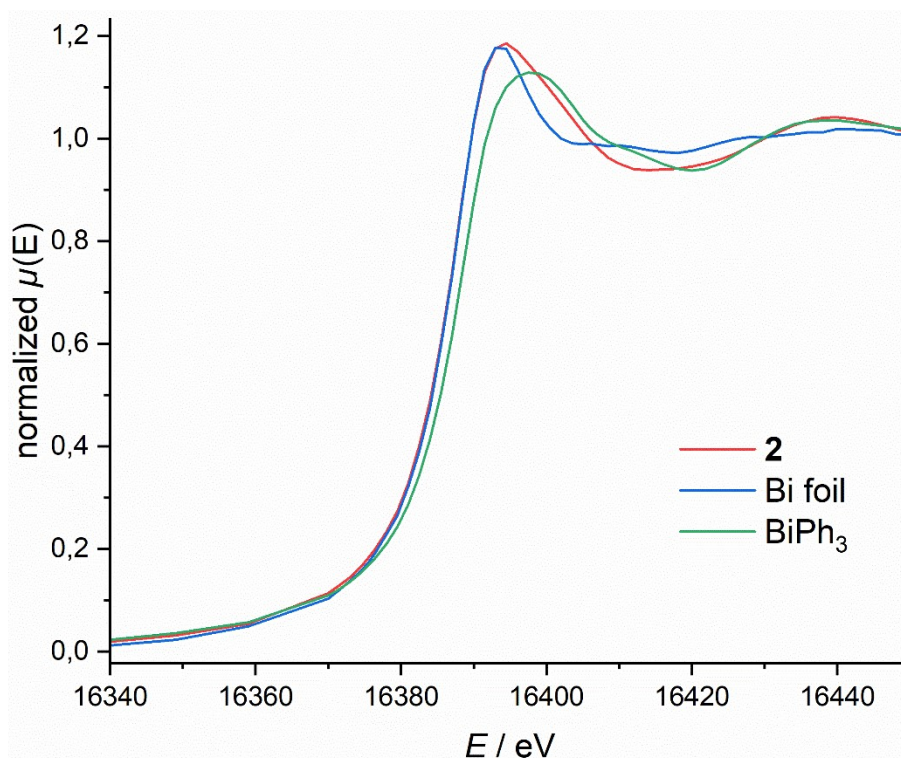

**Figure S40.** Bi  $L_1$ -edge XANES spectrum of **2**, Bi foil and BiPh<sub>3</sub>.

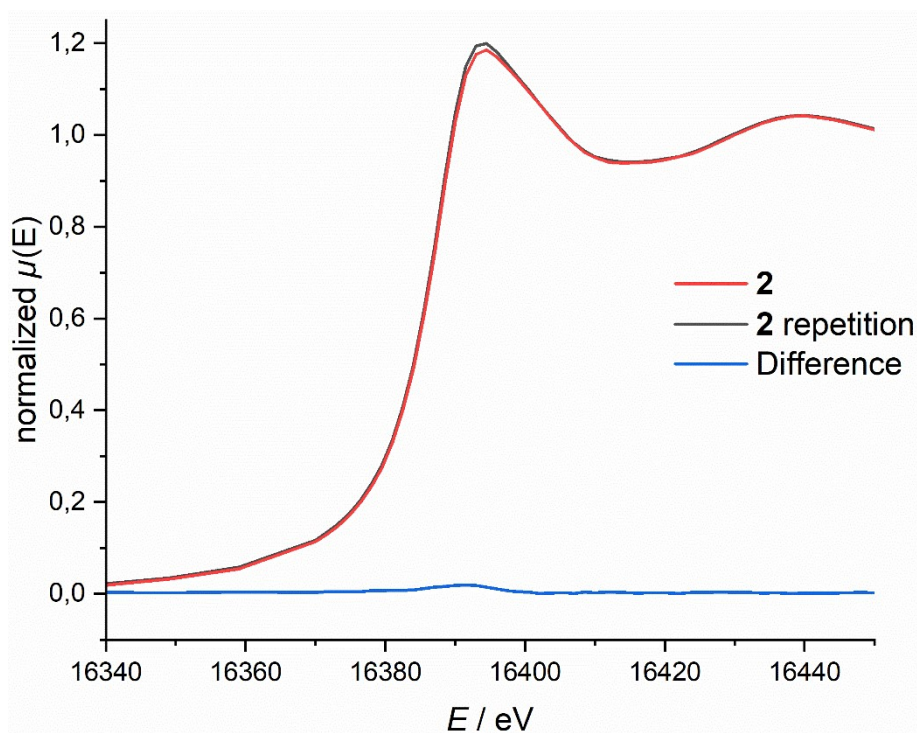

**Figure S41.** Bi  $L_1$ -edge XANES spectrum of **2** after 1 h and the difference spectrum demonstrating the stability of the sample over the course of data acquisition.

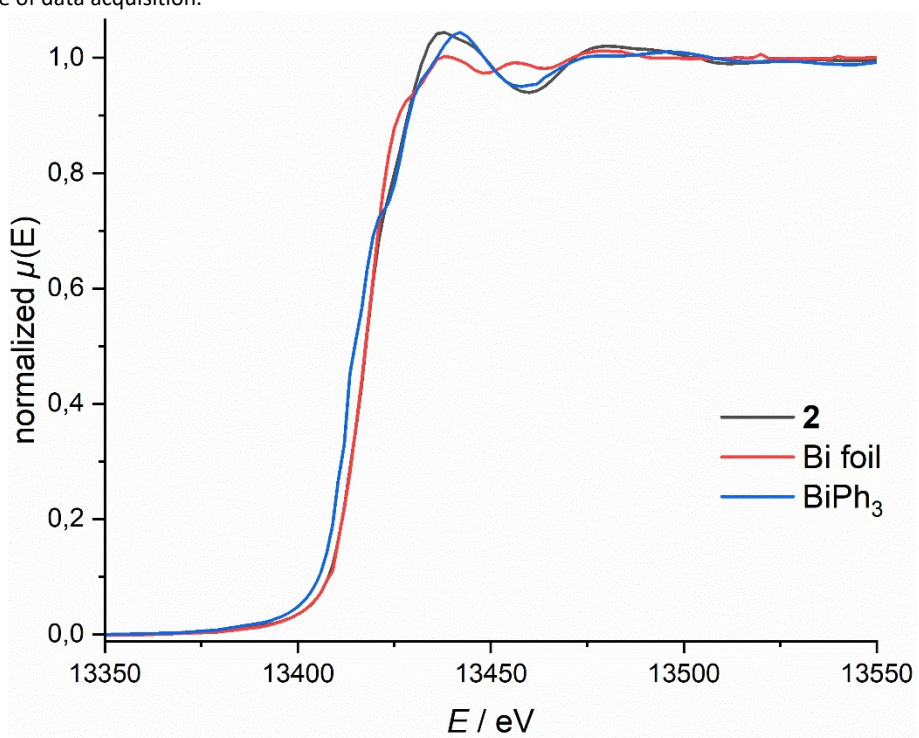

**Figure S42.** Bi  $L_3$ -edge XANES spectrum of **2**, Bi foil and BiPh<sub>3</sub>.

### Computational Details

All calculations were carried out with the ORCA program package.<sup>[S10]</sup> Density fitting techniques, also called resolution-of-identity approximation (RI)<sup>[S11]</sup>, were used for all BP86, PBE and TPSS calculations, whereas an additional chain-of-spheres approximation for the HF exchange (RIJCOSX)<sup>[S12]</sup> was used for CAM-B3LYP calculations. Atom-pairwise dispersion corrections were used for all DFT calculations (D3BJ).<sup>[S13,S14]</sup> All geometries and thermal corrections were obtained with the BP86-D3BJ/def2-SVP (**4**) and PBE-D3BJ/def2-SVP (**2**, **3**) (method on isolated molecules using a medium-tight grid (Grid5) and TIGHTSCF convergence criteria for SCF procedure and the default convergence criteria for geometry optimisations. TDDFT calculations were conducted using CAM-B3LYP/def2-TZVP<sup>[S15]</sup> with the CPCM<sup>[S16]</sup> model for dichloromethane. CASSCF calculations were conducted using the def2-SVP basis set. For all calculations using the def2-SVP and def2-TZVP, the respective build-in effective core potentials (ECP) of the ORCA program package were used. EDA-NOCV calculations were conducted using TPSS-D3BJ<sup>[S17]</sup> together with the DKH-Hamiltonian and the all electron relativistic basis set cc-pVTZ-DK. In addition, the CPCM model for THF was used to avoid the domination of the orbital term by electrostatic and polarization interactions. Plots of the Laplacian and Electron Localisation Function (ELF) of the tungsten complex were performed on the density obtained from the EDA calculations (TPSS-D3BJ/cc-pVTZ-DK) using the program Multiwfn.<sup>[S18]</sup> The methyl groups on the NNN scaffold were truncated to H to improve computational efficiency. **4** could not be optimized due to its large size and consequently the PPh<sub>2</sub> moieties were truncated to PMe<sub>2</sub>, while only the equatorial Me groups of the acridane ligand were truncated to H to realize similar bond geometries when compared to the molecular structures derived from SCXRD.

The transition state for the rocking motion of the Bi ligand around the metal center in complex **3** was obtained as follows: First, a relaxed surface scan was performed, where the N–Bi–W angle was widened from 100 to 175°. This scan showed a monotonous increase in energy. Thus, a frequency calculation on the 175° geometry was performed and the obtained hessian with one imaginary mode was used as an input for an OPTTS calculation using ORCA.

A transition state was located with one imaginary frequency that corresponds to a rocking mode of the Bi pincer around the W(CO)<sub>3</sub> moiety. An activation barrier of 12 kcal/mol was obtained in line with a sharpening of resonances in the <sup>1</sup>H NMR at low temperatures.

Fluoride Ion Affinities were calculated in the gas phase following the protocol established by Greb and co-workers.<sup>[60]</sup> Calculations were performed on the PW6B95-D3BJ/def2-TZVPP level of theory with the COF<sub>2</sub> reference system.<sup>[S13-S15,S19]</sup> The obtained FIAs (**2**: 61 kcal/mol; **3**: 56 kcal/mol) are well below the computed value for BH<sub>3</sub> (68 kcal/mol) rendering both complexes as weak Lewis-acids.

XYZ-coordinates

2

77

|    |           |           |           |
|----|-----------|-----------|-----------|
| C  | 3.627044  | 17.712055 | 0.358447  |
| C  | 2.529381  | 17.193076 | -0.326378 |
| C  | 4.606912  | 16.838775 | 0.915381  |
| H  | 3.732645  | 18.798055 | 0.487658  |
| C  | 4.408511  | 15.414047 | 0.759607  |
| C  | 3.278454  | 14.902634 | 0.069893  |
| C  | 2.354801  | 15.799599 | -0.476405 |
| H  | 1.476263  | 15.409121 | -1.013551 |
| H  | 1.779856  | 17.881108 | -0.746857 |
| C  | 3.080341  | 13.404198 | 0.001471  |
| C  | 4.329748  | 12.606256 | 0.303457  |
| C  | 5.399060  | 13.239381 | 0.988848  |
| C  | 6.578354  | 12.498914 | 1.382345  |
| C  | 6.638957  | 11.116040 | 1.037162  |
| C  | 5.590019  | 10.515630 | 0.342444  |
| H  | 7.509508  | 10.519046 | 1.342045  |
| C  | 4.441578  | 11.251275 | -0.024167 |
| H  | 5.653000  | 9.446676  | 0.086817  |
| H  | 3.617260  | 10.756200 | -0.561197 |
| N  | 5.390720  | 14.589153 | 1.259297  |
| N  | 5.728771  | 17.218336 | 1.579053  |
| N  | 7.533404  | 13.193941 | 2.049189  |
| C  | 8.812266  | 12.601329 | 2.342317  |
| C  | 6.103384  | 18.604120 | 1.691472  |
| Bi | 7.135524  | 15.499481 | 2.351417  |
| H  | 2.289386  | 13.116341 | 0.735628  |
| H  | 2.670506  | 13.114821 | -0.989156 |
| P  | 7.981073  | 18.701854 | 1.883740  |
| H  | 5.664784  | 19.105625 | 2.586655  |
| H  | 5.803157  | 19.206806 | 0.801149  |
| P  | 10.086013 | 13.980785 | 2.488652  |
| H  | 9.144310  | 11.870910 | 1.566825  |
| H  | 8.832335  | 12.054426 | 3.315241  |
| C  | 8.370509  | 23.069160 | 3.483857  |
| C  | 8.774671  | 21.977492 | 4.266972  |
| C  | 7.861945  | 22.855375 | 2.191055  |
| H  | 8.454642  | 24.092669 | 3.880263  |
| C  | 7.757904  | 21.553275 | 1.682298  |

|   |           |           |           |
|---|-----------|-----------|-----------|
| H | 7.544660  | 23.710452 | 1.574908  |
| C | 8.160214  | 20.447928 | 2.464048  |
| H | 7.370441  | 21.390003 | 0.664750  |
| C | 8.670417  | 20.672394 | 3.758645  |
| H | 8.990349  | 19.813218 | 4.369126  |
| H | 9.177034  | 22.141696 | 5.277919  |
| C | 9.657975  | 19.583101 | -0.219836 |
| C | 10.100989 | 19.647643 | -1.549431 |
| C | 8.514098  | 18.828044 | 0.120204  |
| C | 9.415947  | 18.950262 | -2.557740 |
| C | 7.842741  | 18.113502 | -0.896397 |
| C | 8.290587  | 18.180829 | -2.224313 |
| H | 10.195409 | 20.143222 | 0.561112  |
| H | 10.987194 | 20.251606 | -1.799219 |
| H | 6.966163  | 17.495062 | -0.652037 |
| H | 9.762235  | 19.003635 | -3.601233 |
| H | 7.750839  | 17.622853 | -3.004135 |
| C | 10.948471 | 15.734489 | 0.511125  |
| C | 11.117930 | 16.233233 | -0.787149 |
| C | 10.284543 | 14.507302 | 0.731165  |
| C | 10.601929 | 15.524438 | -1.883375 |
| C | 9.770042  | 13.802119 | -0.377197 |
| C | 9.925731  | 14.312229 | -1.675207 |
| H | 11.320874 | 16.310989 | 1.373079  |
| H | 11.622715 | 17.197413 | -0.942066 |
| H | 9.231163  | 12.853871 | -0.235094 |
| H | 10.712408 | 15.929903 | -2.900213 |
| H | 9.508757  | 13.757788 | -2.529526 |
| C | 12.529662 | 12.633470 | 1.795091  |
| C | 13.657167 | 11.856727 | 2.105038  |
| C | 11.600282 | 12.970211 | 2.801138  |
| C | 13.866176 | 11.402023 | 3.416799  |
| C | 11.826546 | 12.522782 | 4.121596  |
| C | 12.945793 | 11.733857 | 4.424713  |
| H | 12.366179 | 12.982215 | 0.764277  |
| H | 14.376798 | 11.600760 | 1.312034  |
| H | 11.119048 | 12.801567 | 4.919817  |
| H | 14.751056 | 10.792936 | 3.656618  |
| H | 13.105941 | 11.384672 | 5.456225  |

3

84

|   |           |           |           |
|---|-----------|-----------|-----------|
| C | -2.465600 | 1.067468  | -0.327079 |
| C | -2.295955 | -0.170847 | -0.937214 |
| C | -1.347293 | 1.771589  | 0.216280  |
| H | -3.469145 | 1.508330  | -0.249596 |
| C | -0.050057 | 1.130949  | 0.110599  |
| C | 0.106538  | -0.131765 | -0.527373 |
| C | -1.016742 | -0.769648 | -1.050103 |
| H | -0.907452 | -1.745865 | -1.545635 |
| H | -3.175476 | -0.697237 | -1.337562 |
| C | -4.674056 | 8.783184  | 0.146407  |
| C | -5.128077 | 7.501403  | -0.209489 |
| C | -3.297034 | 9.036135  | 0.232049  |
| H | -5.397360 | 9.587455  | 0.350562  |
| C | -2.373706 | 8.010423  | -0.026603 |
| H | -2.933477 | 10.039313 | 0.501258  |

|   |           |          |           |
|---|-----------|----------|-----------|
| C | -2.819597 | 6.722130 | -0.374128 |
| H | -1.293019 | 8.205873 | 0.029038  |
| C | -4.207582 | 6.477983 | -0.473431 |
| H | -4.571785 | 5.485894 | -0.781618 |
| H | -6.207695 | 7.299970 | -0.289983 |
| C | -2.053507 | 3.498398 | -2.805095 |
| C | -2.126417 | 4.844530 | -2.393705 |
| C | -2.347271 | 3.145490 | -4.130722 |
| H | -1.757365 | 2.712602 | -2.097444 |
| C | -2.702546 | 4.131391 | -5.064038 |
| H | -2.288481 | 2.088491 | -4.432920 |
| C | -2.759419 | 5.476839 | -4.664728 |
| H | -2.931149 | 3.852695 | -6.103914 |
| C | -2.474142 | 5.833873 | -3.338805 |
| H | -3.029315 | 6.258381 | -5.391309 |
| H | -2.518123 | 6.890713 | -3.036362 |

|   |          |           |           |    |           |           |           |
|---|----------|-----------|-----------|----|-----------|-----------|-----------|
| C | 4.830470 | 10.183776 | 1.194988  | H  | 5.369002  | 3.104113  | -0.244966 |
| C | 5.439353 | 9.024018  | 1.697507  | C  | 3.850609  | 0.131921  | -1.082018 |
| C | 3.761919 | 10.074972 | 0.290749  | H  | 5.824870  | 0.989855  | -1.433735 |
| H | 5.185672 | 11.174967 | 1.514428  | H  | 4.078534  | -0.798761 | -1.623864 |
| C | 3.301431 | 8.812430  | -0.107812 | P  | -1.613460 | 5.357828  | -0.694870 |
| H | 3.274540 | 10.980121 | -0.101236 | P  | 3.274255  | 6.018721  | -0.217734 |
| C | 3.915478 | 7.642282  | 0.383764  | N  | 1.035321  | 1.854868  | 0.523571  |
| H | 2.445498 | 8.724407  | -0.794692 | N  | -1.386059 | 2.997939  | 0.791381  |
| C | 4.987955 | 7.758128  | 1.292386  | N  | 2.964302  | 3.634990  | 1.055610  |
| H | 5.480603 | 6.862783  | 1.700572  | C  | 1.495380  | -0.731435 | -0.568471 |
| H | 6.273678 | 9.103393  | 2.411470  | H  | 1.612039  | -1.385628 | -1.455991 |
| C | 3.905061 | 5.415324  | -2.896498 | H  | 1.616682  | -1.403175 | 0.317154  |
| C | 4.432644 | 5.653137  | -1.614441 | C  | 3.795775  | 4.818407  | 1.139252  |
| C | 4.758200 | 5.106698  | -3.967780 | H  | 4.881686  | 4.584692  | 1.114946  |
| H | 2.815826 | 5.476261  | -3.045294 | H  | 3.585440  | 5.346679  | 2.094885  |
| C | 6.144344 | 5.036457  | -3.766182 | C  | -2.362722 | 3.988442  | 0.460770  |
| H | 4.332630 | 4.915439  | -4.964481 | H  | -2.692037 | 4.555754  | 1.357954  |
| C | 6.680554 | 5.296166  | -2.492420 | H  | -3.267677 | 3.577141  | -0.032935 |
| H | 6.812646 | 4.786925  | -4.604409 | Bi | 0.650115  | 3.790200  | 1.662641  |
| C | 5.830425 | 5.610755  | -1.423924 | W  | 0.815079  | 5.746882  | -0.500197 |
| H | 7.769493 | 5.258437  | -2.332635 | C  | 1.075911  | 4.159243  | -1.765721 |
| H | 6.264288 | 5.835432  | -0.436860 | C  | 0.555055  | 7.142001  | -1.867627 |
| C | 2.303668 | 1.536028  | 0.148631  | C  | 0.661683  | 7.063836  | 1.042435  |
| C | 2.587704 | 0.313844  | -0.527735 | O  | 0.615080  | 7.776819  | 1.975098  |
| C | 3.322893 | 2.557854  | 0.330876  | O  | 1.237456  | 3.200631  | -2.418774 |
| C | 4.590383 | 2.331753  | -0.294482 | O  | 0.379574  | 7.976614  | -2.682873 |
| C | 4.839331 | 1.145064  | -0.969557 |    |           |           |           |

### Relaxed Surface Scan of 3

84

Coordinates from ORCA-job W-scan1 Relaxed Surface  
Scan Step 1

|   |           |           |           |   |           |           |           |
|---|-----------|-----------|-----------|---|-----------|-----------|-----------|
| C | -2.442594 | 1.101020  | -0.420964 | H | -2.951754 | 3.881298  | -6.073911 |
| C | -2.259826 | -0.106214 | -1.087286 | C | -2.580572 | 5.834168  | -3.274171 |
| C | -1.333924 | 1.781044  | 0.172240  | H | -3.196722 | 6.260736  | -5.309866 |
| H | -3.446359 | 1.541382  | -0.344446 | H | -2.686684 | 6.879121  | -2.947727 |
| C | -0.033100 | 1.147489  | 0.063886  | C | 4.740249  | 10.222865 | 1.077911  |
| C | 0.137268  | -0.082383 | -0.633828 | C | 5.318209  | 9.089323  | 1.671944  |
| C | -0.975298 | -0.695519 | -1.208258 | C | 3.725253  | 10.068294 | 0.117748  |
| H | -0.853971 | -1.643633 | -1.754233 | H | 5.077274  | 11.229660 | 1.368547  |
| H | -3.130459 | -0.613468 | -1.530512 | C | 3.286611  | 8.786613  | -0.244605 |
| C | -4.608711 | 8.823686  | 0.225057  | H | 3.263498  | 10.953127 | -0.346339 |
| C | -5.092841 | 7.534465  | -0.061423 | C | 3.869854  | 7.643343  | 0.340993  |
| C | -3.225765 | 9.065287  | 0.231304  | H | 2.474295  | 8.662644  | -0.976641 |
| H | -5.313807 | 9.642138  | 0.437133  | C | 4.888612  | 7.803439  | 1.303251  |
| C | -2.325562 | 8.020694  | -0.037341 | H | 5.353866  | 6.927740  | 1.780489  |
| H | -2.840404 | 10.073882 | 0.445011  | H | 6.108297  | 9.204379  | 2.429933  |
| C | -2.801771 | 6.726139  | -0.317104 | C | 3.927651  | 5.200360  | -2.822617 |
| H | -1.242388 | 8.205049  | -0.042653 | C | 4.429150  | 5.577604  | -1.564270 |
| C | -4.195555 | 6.492454  | -0.336613 | C | 4.807325  | 4.810596  | -3.846046 |
| H | -4.584237 | 5.493942  | -0.589911 | H | 2.841340  | 5.213329  | -2.990750 |
| H | -6.176778 | 7.342248  | -0.077687 | C | 6.192274  | 4.801773  | -3.618496 |
| C | -1.994538 | 3.519731  | -2.797103 | H | 4.404072  | 4.508195  | -4.824364 |
| C | -2.150826 | 4.850650  | -2.357417 | C | 6.701367  | 5.208435  | -2.370726 |
| C | -2.289858 | 3.173079  | -4.123801 | H | 6.881467  | 4.488414  | -4.417731 |
| H | -1.628382 | 2.744690  | -2.111519 | C | 5.824666  | 5.602395  | -1.350520 |
| C | -2.726159 | 4.153070  | -5.031231 | H | 7.788274  | 5.222763  | -2.195748 |
| H | -2.166720 | 2.128437  | -4.448149 | H | 6.230850  | 5.936925  | -0.382894 |
| C | -2.864680 | 5.484459  | -4.603326 | C | 2.318948  | 1.566206  | 0.135350  |
|   |           |           |           | C | 2.612382  | 0.380317  | -0.600293 |
|   |           |           |           | C | 3.326302  | 2.593768  | 0.349055  |

|    |           |           |           |   |           |           |           |
|----|-----------|-----------|-----------|---|-----------|-----------|-----------|
| C  | 4.593620  | 2.410605  | -0.290709 | H | -2.605156 | 3.854362  | -6.146107 |
| C  | 4.851396  | 1.259484  | -1.022609 | C | -2.327728 | 5.860001  | -3.373663 |
| H  | 5.363434  | 3.187377  | -0.206525 | H | -2.745003 | 6.267333  | -5.462657 |
| C  | 3.871987  | 0.240978  | -1.175579 | H | -2.381904 | 6.919296  | -3.081394 |
| H  | 5.835878  | 1.136742  | -1.499052 | C | 4.972164  | 10.132036 | 1.253684  |
| H  | 4.104690  | -0.659375 | -1.764868 | C | 5.592103  | 8.941416  | 1.667467  |
| P  | -1.624918 | 5.347754  | -0.662480 | C | 3.844232  | 10.078873 | 0.417089  |
| P  | 3.249506  | 5.997116  | -0.206917 | H | 5.366350  | 11.103639 | 1.588863  |
| N  | 1.045595  | 1.854009  | 0.527295  | C | 3.334408  | 8.840732  | -0.000806 |
| N  | -1.386444 | 2.983546  | 0.794947  | H | 3.350264  | 11.008017 | 0.094352  |
| N  | 2.957130  | 3.645278  | 1.107528  | C | 3.957602  | 7.642029  | 0.403099  |
| C  | 1.530164  | -0.675247 | -0.680094 | H | 2.437331  | 8.790858  | -0.636727 |
| H  | 1.658500  | -1.303154 | -1.584495 | C | 5.091109  | 7.700539  | 1.241002  |
| H  | 1.648396  | -1.368440 | 0.189070  | H | 5.592552  | 6.779446  | 1.574270  |
| C  | 3.766981  | 4.845985  | 1.191533  | H | 6.472137  | 8.977081  | 2.328033  |
| H  | 4.857090  | 4.631216  | 1.193546  | C | 3.730248  | 5.642233  | -2.959468 |
| H  | 3.524357  | 5.385513  | 2.132514  | C | 4.315549  | 5.708261  | -1.681432 |
| C  | -2.369127 | 3.978821  | 0.490065  | C | 4.521724  | 5.370712  | -4.087548 |
| H  | -2.677569 | 4.536253  | 1.400719  | H | 2.647219  | 5.807861  | -3.060148 |
| H  | -3.283982 | 3.572330  | 0.011200  | C | 5.903114  | 5.165312  | -3.946591 |
| Bi | 0.637929  | 3.776296  | 1.679923  | H | 4.051602  | 5.315605  | -5.081135 |
| W  | 0.800704  | 5.713843  | -0.493066 | C | 6.497967  | 5.251600  | -2.674558 |
| C  | 1.050684  | 4.103643  | -1.726839 | H | 6.522202  | 4.944734  | -4.829751 |
| C  | 0.541511  | 7.088934  | -1.882394 | C | 5.709252  | 5.529180  | -1.549077 |
| C  | 0.663715  | 7.035896  | 1.048403  | H | 7.583512  | 5.107338  | -2.560897 |
| O  | 0.630789  | 7.737716  | 1.990400  | H | 6.190055  | 5.618913  | -0.562187 |
| O  | 1.209579  | 3.128104  | -2.357663 | C | 2.315211  | 1.476281  | 0.222943  |
| O  | 0.365576  | 7.908696  | -2.712994 | C | 2.589479  | 0.219859  | -0.393252 |

>

84

Coordinates from ORCA-job W-scan1 Relaxed Surface  
Scan Step 2

|   |           |           |           |
|---|-----------|-----------|-----------|
| C | -2.448453 | 1.063109  | -0.330758 |
| C | -2.284571 | -0.203256 | -0.881771 |
| C | -1.330061 | 1.769234  | 0.215750  |
| H | -3.443134 | 1.529509  | -0.308481 |
| C | -0.044229 | 1.090321  | 0.188407  |
| C | 0.105315  | -0.201899 | -0.390300 |
| C | -1.014136 | -0.835417 | -0.927315 |
| H | -0.911360 | -1.830335 | -1.386890 |
| H | -3.160986 | -0.727263 | -1.293193 |
| C | -4.812041 | 8.725005  | 0.075605  |
| C | -5.215214 | 7.453478  | -0.371435 |
| C | -3.449344 | 8.997043  | 0.276856  |
| H | -5.564359 | 9.507422  | 0.259743  |
| C | -2.488984 | 7.999186  | 0.040808  |
| H | -3.127458 | 9.993301  | 0.616448  |
| C | -2.886209 | 6.723020  | -0.399459 |
| H | -1.418592 | 8.204332  | 0.184318  |
| C | -4.257531 | 6.457843  | -0.612738 |
| H | -4.575897 | 5.474017  | -0.991796 |
| H | -6.282011 | 7.240141  | -0.540537 |
| C | -1.955209 | 3.524730  | -2.791142 |
| C | -2.047288 | 4.876060  | -2.400745 |
| C | -2.160900 | 3.160845  | -4.131023 |
| H | -1.705443 | 2.745099  | -2.059304 |
| C | -2.448354 | 4.141017  | -5.094854 |
| H | -2.086007 | 2.101348  | -4.420050 |
| C | -2.527362 | 5.491715  | -4.712287 |

|    |           |           |           |
|----|-----------|-----------|-----------|
| H  | -2.605156 | 3.854362  | -6.146107 |
| C  | -2.327728 | 5.860001  | -3.373663 |
| H  | -2.745003 | 6.267333  | -5.462657 |
| H  | -2.381904 | 6.919296  | -3.081394 |
| C  | 4.972164  | 10.132036 | 1.253684  |
| C  | 5.592103  | 8.941416  | 1.667467  |
| C  | 3.844232  | 10.078873 | 0.417089  |
| H  | 5.366350  | 11.103639 | 1.588863  |
| C  | 3.334408  | 8.840732  | -0.000806 |
| H  | 3.350264  | 11.008017 | 0.094352  |
| C  | 3.957602  | 7.642029  | 0.403099  |
| H  | 2.437331  | 8.790858  | -0.636727 |
| C  | 5.091109  | 7.700539  | 1.241002  |
| H  | 5.592552  | 6.779446  | 1.574270  |
| H  | 6.472137  | 8.977081  | 2.328033  |
| C  | 3.730248  | 5.642233  | -2.959468 |
| C  | 4.315549  | 5.708261  | -1.681432 |
| C  | 4.521724  | 5.370712  | -4.087548 |
| H  | 2.647219  | 5.807861  | -3.060148 |
| C  | 5.903114  | 5.165312  | -3.946591 |
| H  | 4.051602  | 5.315605  | -5.081135 |
| C  | 6.497967  | 5.251600  | -2.674558 |
| H  | 6.522202  | 4.944734  | -4.829751 |
| C  | 5.709252  | 5.529180  | -1.549077 |
| H  | 7.583512  | 5.107338  | -2.560897 |
| H  | 6.190055  | 5.618913  | -0.562187 |
| C  | 2.315211  | 1.476281  | 0.222943  |
| C  | 2.589479  | 0.219859  | -0.393252 |
| C  | 3.336409  | 2.511538  | 0.331986  |
| C  | 4.595067  | 2.253009  | -0.301940 |
| C  | 4.832185  | 1.033257  | -0.919738 |
| H  | 5.369690  | 3.030612  | -0.306738 |
| C  | 3.841964  | 0.012198  | -0.962659 |
| H  | 5.808173  | 0.853867  | -1.396016 |
| H  | 4.061491  | -0.942233 | -1.465464 |
| P  | -1.624798 | 5.410374  | -0.689529 |
| P  | 3.240600  | 6.060295  | -0.218335 |
| N  | 1.047271  | 1.808949  | 0.595556  |
| N  | -1.348988 | 3.022754  | 0.719228  |
| N  | 2.988695  | 3.622995  | 1.004224  |
| C  | 1.488652  | -0.821221 | -0.362426 |
| H  | 1.610040  | -1.548553 | -1.189839 |
| H  | 1.591020  | -1.413386 | 0.580269  |
| C  | 3.822068  | 4.805434  | 1.066193  |
| H  | 4.902712  | 4.573890  | 0.963129  |
| H  | 3.677431  | 5.303512  | 2.050006  |
| C  | -2.350118 | 4.002767  | 0.416286  |
| H  | -2.692182 | 4.531299  | 1.332781  |
| H  | -3.245763 | 3.585419  | -0.088830 |
| Bi | 0.683826  | 3.835289  | 1.558420  |
| W  | 0.778779  | 5.877421  | -0.455991 |
| C  | 1.087469  | 4.296996  | -1.722030 |
| C  | 0.512192  | 7.310581  | -1.786441 |
| C  | 0.621418  | 7.135549  | 1.132135  |
| O  | 0.580713  | 7.801611  | 2.100189  |
| O  | 1.290970  | 3.326179  | -2.345608 |
| O  | 0.331520  | 8.158012  | -2.587890 |

>

84



Coordinates from ORCA-job W-scan1 Relaxed Surface  
Scan Step 3

|   |           |           |           |
|---|-----------|-----------|-----------|
| C | -2.412682 | 1.016592  | -0.353871 |
| C | -2.255086 | -0.299822 | -0.773716 |
| C | -1.297143 | 1.751646  | 0.161808  |
| H | -3.398249 | 1.499169  | -0.411014 |
| C | -0.024221 | 1.046243  | 0.238477  |
| C | 0.115179  | -0.303899 | -0.190387 |
| C | -1.000018 | -0.962770 | -0.704726 |
| H | -0.908033 | -2.001071 | -1.058387 |
| H | -3.126819 | -0.844028 | -1.168691 |
| C | -4.978244 | 8.625112  | 0.035650  |
| C | -5.313929 | 7.375933  | -0.517749 |
| C | -3.638740 | 8.923107  | 0.333574  |
| H | -5.765183 | 9.370864  | 0.227132  |
| C | -2.633999 | 7.972742  | 0.086705  |
| H | -3.370123 | 9.903024  | 0.756721  |
| C | -2.964936 | 6.718779  | -0.459402 |
| H | -1.579685 | 8.197716  | 0.303407  |
| C | -4.312001 | 6.427241  | -0.768739 |
| H | -4.574502 | 5.461771  | -1.229356 |
| H | -6.362049 | 7.144140  | -0.762481 |
| C | -1.947172 | 3.602881  | -2.881398 |
| C | -2.005865 | 4.954360  | -2.486309 |
| C | -2.106269 | 3.255483  | -4.232615 |
| H | -1.755125 | 2.809795  | -2.145761 |
| C | -2.318523 | 4.251280  | -5.199256 |
| H | -2.054422 | 2.196372  | -4.527976 |
| C | -2.367446 | 5.601918  | -4.809980 |
| H | -2.439876 | 3.976946  | -6.258416 |
| C | -2.209510 | 5.954209  | -3.462036 |
| H | -2.527290 | 6.389069  | -5.562852 |
| H | -2.236423 | 7.012983  | -3.163083 |
| C | 5.160728  | 10.023779 | 1.353606  |
| C | 5.849149  | 8.807891  | 1.505401  |
| C | 3.904734  | 10.042299 | 0.724876  |
| H | 5.605153  | 10.958588 | 1.728378  |
| C | 3.333492  | 8.848964  | 0.256460  |
| H | 3.359869  | 10.990946 | 0.603949  |
| C | 4.019646  | 7.626951  | 0.402615  |
| H | 2.343170  | 8.849826  | -0.224269 |
| C | 5.285258  | 7.614797  | 1.026943  |
| H | 5.845043  | 6.674589  | 1.143551  |
| H | 6.833554  | 8.788068  | 1.998031  |
| C | 3.608959  | 6.102320  | -3.048941 |
| C | 4.209162  | 5.814112  | -1.807062 |
| C | 4.328836  | 5.935282  | -4.242216 |
| H | 2.567481  | 6.456387  | -3.070470 |
| C | 5.655365  | 5.476258  | -4.208041 |
| H | 3.844498  | 6.160385  | -5.204527 |
| C | 6.265492  | 5.198366  | -2.972735 |
| H | 6.217349  | 5.336541  | -5.144231 |
| C | 5.548228  | 5.372915  | -1.779692 |
| H | 7.307784  | 4.845663  | -2.937143 |
| H | 6.050940  | 5.169475  | -0.821887 |
| C | 2.346576  | 1.379870  | 0.347982  |
| C | 2.617836  | 0.052548  | -0.093918 |
| C | 3.388697  | 2.401664  | 0.406249  |
| C | 4.687909  | 2.025329  | -0.066494 |

|    |           |           |           |
|----|-----------|-----------|-----------|
| C  | 4.926020  | 0.732904  | -0.514225 |
| H  | 5.496105  | 2.768374  | -0.078993 |
| C  | 3.903250  | -0.256568 | -0.529937 |
| H  | 5.932342  | 0.466546  | -0.872311 |
| H  | 4.127134  | -1.268756 | -0.900241 |
| P  | -1.639909 | 5.473689  | -0.758110 |
| P  | 3.217631  | 6.103531  | -0.268332 |
| N  | 1.068762  | 1.779764  | 0.604533  |
| N  | -1.296092 | 3.040491  | 0.556566  |
| N  | 3.020485  | 3.597435  | 0.897343  |
| C  | 1.479548  | -0.948677 | -0.033732 |
| H  | 1.622292  | -1.751200 | -0.785118 |
| H  | 1.513768  | -1.457636 | 0.960903  |
| C  | 3.856813  | 4.774226  | 0.928554  |
| H  | 4.924254  | 4.547931  | 0.734294  |
| H  | 3.800965  | 5.247842  | 1.934137  |
| C  | -2.325799 | 4.001536  | 0.275704  |
| H  | -2.708228 | 4.471266  | 1.208850  |
| H  | -3.195591 | 3.574550  | -0.265272 |
| Bi | 0.729232  | 3.880924  | 1.371215  |
| W  | 0.743145  | 6.023565  | -0.477849 |
| C  | 1.083434  | 4.554398  | -1.868279 |
| C  | 0.487787  | 7.532032  | -1.723645 |
| C  | 0.546774  | 7.197447  | 1.170259  |
| O  | 0.478820  | 7.822941  | 2.163565  |
| O  | 1.306070  | 3.649091  | -2.574998 |
| O  | 0.310745  | 8.422326  | -2.478377 |

>

84

Coordinates from ORCA-job W-scan1 Relaxed Surface  
Scan Step 4

|   |           |           |           |
|---|-----------|-----------|-----------|
| C | -2.258162 | 0.944760  | -0.489332 |
| C | -2.074575 | -0.403103 | -0.780280 |
| C | -1.174204 | 1.727378  | 0.023205  |
| H | -3.239494 | 1.414237  | -0.645075 |
| C | 0.096532  | 1.036438  | 0.225267  |
| C | 0.257415  | -0.349261 | -0.054987 |
| C | -0.828275 | -1.054245 | -0.572786 |
| H | -0.720890 | -2.121514 | -0.820040 |
| H | -2.920547 | -0.984455 | -1.178420 |
| C | -5.212084 | 8.418083  | -0.041486 |
| C | -5.457400 | 7.169787  | -0.642402 |
| C | -3.900007 | 8.790473  | 0.292673  |
| H | -6.048456 | 9.105557  | 0.158396  |
| C | -2.832264 | 7.914427  | 0.035484  |
| H | -3.702458 | 9.770679  | 0.752613  |
| C | -3.073417 | 6.661119  | -0.557065 |
| H | -1.797987 | 8.197835  | 0.279038  |
| C | -4.392571 | 6.295426  | -0.904244 |
| H | -4.584446 | 5.331603  | -1.401715 |
| H | -6.483978 | 6.881116  | -0.916176 |
| C | -1.890870 | 3.705402  | -3.061648 |
| C | -1.960705 | 5.043609  | -2.626982 |
| C | -1.998012 | 3.402725  | -4.429154 |
| H | -1.725873 | 2.888155  | -2.344940 |
| C | -2.171720 | 4.429904  | -5.369764 |
| H | -1.935464 | 2.354070  | -4.757942 |
| C | -2.230347 | 5.768033  | -4.939878 |
| H | -2.252417 | 4.190367  | -6.441095 |

|    |           |           |           |
|----|-----------|-----------|-----------|
| C  | -2.119942 | 6.075489  | -3.576836 |
| H  | -2.357697 | 6.579265  | -5.673128 |
| H  | -2.147976 | 7.124243  | -3.242364 |
| C  | 5.472860  | 9.910443  | 1.339249  |
| C  | 6.183572  | 8.811211  | 0.823660  |
| C  | 4.069100  | 9.887598  | 1.368147  |
| H  | 6.017752  | 10.791641 | 1.711578  |
| C  | 3.373058  | 8.765583  | 0.888312  |
| H  | 3.509017  | 10.750003 | 1.760655  |
| C  | 4.079710  | 7.660175  | 0.379382  |
| H  | 2.273518  | 8.740711  | 0.890048  |
| C  | 5.491062  | 7.691038  | 0.341476  |
| H  | 6.048472  | 6.844284  | -0.089263 |
| H  | 7.283639  | 8.832282  | 0.788908  |
| C  | 4.089235  | 6.928764  | -2.762436 |
| C  | 3.999604  | 5.867257  | -1.836253 |
| C  | 4.617494  | 6.705720  | -4.041251 |
| H  | 3.733326  | 7.931255  | -2.478342 |
| C  | 5.050827  | 5.420026  | -4.412892 |
| H  | 4.686536  | 7.540422  | -4.755517 |
| C  | 4.949327  | 4.359361  | -3.499396 |
| H  | 5.459751  | 5.244825  | -5.419722 |
| C  | 4.424417  | 4.578693  | -2.214931 |
| H  | 5.272137  | 3.346925  | -3.786720 |
| H  | 4.326635  | 3.727948  | -1.525708 |
| C  | 2.456407  | 1.367828  | 0.545379  |
| C  | 2.755509  | 0.001476  | 0.284178  |
| C  | 3.499616  | 2.383796  | 0.656789  |
| C  | 4.849830  | 1.942753  | 0.476157  |
| C  | 5.120512  | 0.607016  | 0.197373  |
| H  | 5.672923  | 2.665341  | 0.566326  |
| C  | 4.087621  | -0.364101 | 0.094997  |
| H  | 6.165920  | 0.291080  | 0.056957  |
| H  | 4.341551  | -1.410855 | -0.132122 |
| P  | -1.660844 | 5.520015  | -0.874077 |
| P  | 3.150665  | 6.191395  | -0.234886 |
| N  | 1.163955  | 1.802240  | 0.593690  |
| N  | -1.194409 | 3.038985  | 0.328066  |
| N  | 3.083591  | 3.640237  | 0.905649  |
| C  | 1.600422  | -0.984588 | 0.260597  |
| H  | 1.812581  | -1.815748 | -0.442678 |
| H  | 1.530367  | -1.460924 | 1.269084  |
| C  | 3.899039  | 4.826877  | 0.890046  |
| H  | 4.937344  | 4.643148  | 0.544145  |
| H  | 3.963610  | 5.286146  | 1.901953  |
| C  | -2.270471 | 3.958761  | 0.062993  |
| H  | -2.717873 | 4.340006  | 1.008311  |
| H  | -3.092050 | 3.512849  | -0.534843 |
| Bi | 0.784209  | 3.940664  | 1.179922  |
| W  | 0.687687  | 6.195842  | -0.476216 |
| C  | 1.067595  | 5.073258  | -2.154894 |
| C  | 0.603204  | 7.883226  | -1.501250 |
| C  | 0.314439  | 7.195204  | 1.257032  |
| O  | 0.099744  | 7.753841  | 2.269988  |
| O  | 1.284856  | 4.403602  | -3.084630 |
| O  | 0.555972  | 8.888432  | -2.113766 |

>  
84

Coordinates from ORCA-job W-scan1 Relaxed Surface  
Scan Step 5

|   |           |           |           |
|---|-----------|-----------|-----------|
| C | -2.274256 | 0.871713  | -0.403997 |
| C | -2.111428 | -0.501734 | -0.571392 |
| C | -1.168241 | 1.681197  | -0.000116 |
| H | -3.252362 | 1.340214  | -0.582812 |
| C | 0.097443  | 0.994466  | 0.239680  |
| C | 0.239591  | -0.411282 | 0.090664  |
| C | -0.868813 | -1.146741 | -0.333225 |
| H | -0.780407 | -2.234087 | -0.481041 |
| H | -2.972736 | -1.106464 | -0.894889 |
| C | -5.272715 | 8.325530  | 0.003555  |
| C | -5.490606 | 7.091334  | -0.635810 |
| C | -3.968209 | 8.720335  | 0.341743  |
| H | -6.124801 | 8.984651  | 0.230628  |
| C | -2.880542 | 7.880633  | 0.049549  |
| H | -3.792275 | 9.689798  | 0.832202  |
| C | -3.094220 | 6.641192  | -0.581550 |
| H | -1.851748 | 8.181874  | 0.295420  |
| C | -4.406049 | 6.252795  | -0.931805 |
| H | -4.577414 | 5.300303  | -1.457679 |
| H | -6.511426 | 6.785457  | -0.912418 |
| C | -1.795393 | 3.774422  | -3.157399 |
| C | -1.951581 | 5.098493  | -2.700304 |
| C | -1.899678 | 3.486482  | -4.527976 |
| H | -1.562840 | 2.962494  | -2.452789 |
| C | -2.156831 | 4.514149  | -5.448968 |
| H | -1.769781 | 2.450227  | -4.875757 |
| C | -2.302950 | 5.837721  | -4.996404 |
| H | -2.235007 | 4.286455  | -6.523033 |
| C | -2.195699 | 6.131261  | -3.629752 |
| H | -2.496990 | 6.649050  | -5.714669 |
| H | -2.294252 | 7.169686  | -3.277054 |
| C | 5.540689  | 9.828729  | 1.432171  |
| C | 6.234623  | 8.739544  | 0.874000  |
| C | 4.136532  | 9.830454  | 1.452625  |
| H | 6.099375  | 10.682911 | 1.844843  |
| C | 3.423412  | 8.742510  | 0.922274  |
| H | 3.589613  | 10.685306 | 1.878625  |
| C | 4.113083  | 7.646831  | 0.370799  |
| H | 2.323726  | 8.736334  | 0.918266  |
| C | 5.524985  | 7.653267  | 0.341505  |
| H | 6.070443  | 6.814949  | -0.119936 |
| H | 7.335256  | 8.741721  | 0.846483  |
| C | 4.159187  | 7.028051  | -2.793230 |
| C | 3.996074  | 5.935053  | -1.916189 |
| C | 4.675204  | 6.826492  | -4.080929 |
| H | 3.870696  | 8.038485  | -2.464177 |
| C | 5.022302  | 5.532494  | -4.509053 |
| H | 4.801963  | 7.685160  | -4.757996 |
| C | 4.847615  | 4.441161  | -3.643695 |
| H | 5.420873  | 5.375125  | -5.522931 |
| C | 4.335150  | 4.638072  | -2.350995 |
| H | 5.103155  | 3.423567  | -3.976665 |
| H | 4.174971  | 3.768485  | -1.696885 |
| C | 2.464932  | 1.325042  | 0.551875  |
| C | 2.749664  | -0.060838 | 0.422334  |
| C | 3.516492  | 2.335351  | 0.618026  |
| C | 4.864744  | 1.868713  | 0.540300  |

|    |           |           |           |
|----|-----------|-----------|-----------|
| C  | 5.126219  | 0.508989  | 0.386389  |
| H  | 5.692520  | 2.589277  | 0.601279  |
| C  | 4.085255  | -0.454961 | 0.322231  |
| H  | 6.171512  | 0.170465  | 0.315885  |
| H  | 4.333873  | -1.519984 | 0.196107  |
| P  | -1.654158 | 5.548280  | -0.939973 |
| P  | 3.158579  | 6.221004  | -0.301744 |
| N  | 1.176726  | 1.777485  | 0.534137  |
| N  | -1.157060 | 3.019922  | 0.175718  |
| N  | 3.100516  | 3.614307  | 0.736369  |
| C  | 1.583320  | -1.036933 | 0.431600  |
| H  | 1.791994  | -1.892292 | -0.244248 |
| H  | 1.510588  | -1.482705 | 1.453266  |
| C  | 3.920493  | 4.796132  | 0.749812  |
| H  | 4.939804  | 4.620698  | 0.345764  |
| H  | 4.038799  | 5.208275  | 1.777746  |
| C  | -2.241534 | 3.934907  | -0.062678 |
| H  | -2.724219 | 4.263239  | 0.885846  |
| H  | -3.037139 | 3.503861  | -0.706045 |
| Bi | 0.822543  | 3.944139  | 0.926383  |
| W  | 0.686285  | 6.292069  | -0.542410 |
| C  | 1.048889  | 5.388394  | -2.353197 |
| C  | 0.585265  | 8.050853  | -1.438058 |
| C  | 0.314624  | 7.207283  | 1.238506  |
| O  | 0.097190  | 7.746813  | 2.260049  |
| O  | 1.252943  | 4.879357  | -3.381333 |
| O  | 0.529907  | 9.098103  | -1.973258 |

>

84

Coordinates from ORCA-job W-scan1 Relaxed Surface  
Scan Step 6

|   |           |           |           |
|---|-----------|-----------|-----------|
| C | -2.303847 | 0.809961  | -0.280708 |
| C | -2.165822 | -0.578140 | -0.310252 |
| C | -1.169023 | 1.633423  | -0.022821 |
| H | -3.282342 | 1.277190  | -0.461717 |
| C | 0.096883  | 0.954847  | 0.229151  |
| C | 0.217926  | -0.458556 | 0.223553  |
| C | -0.922005 | -1.214673 | -0.066020 |
| H | -0.855256 | -2.313141 | -0.100076 |
| H | -3.049270 | -1.198595 | -0.526407 |
| C | -5.317159 | 8.227426  | 0.049109  |
| C | -5.511342 | 7.017131  | -0.641437 |
| C | -4.020446 | 8.632852  | 0.404248  |
| H | -6.181768 | 8.859710  | 0.303432  |
| C | -2.916764 | 7.827922  | 0.076731  |
| H | -3.863135 | 9.583817  | 0.935493  |
| C | -3.106631 | 6.612316  | -0.606392 |
| H | -1.893971 | 8.138485  | 0.335758  |
| C | -4.410984 | 6.212672  | -0.971750 |
| H | -4.564492 | 5.279374  | -1.536000 |
| H | -6.526138 | 6.703027  | -0.930596 |
| C | -1.661394 | 3.860688  | -3.269538 |
| C | -1.933465 | 5.154471  | -2.779300 |
| C | -1.754005 | 3.596818  | -4.645249 |
| H | -1.346948 | 3.061437  | -2.581564 |
| C | -2.113992 | 4.618753  | -5.538438 |
| H | -1.534770 | 2.585438  | -5.020399 |
| C | -2.375902 | 5.911855  | -5.052421 |
| H | -2.182376 | 4.410498  | -6.617076 |

|    |           |           |           |
|----|-----------|-----------|-----------|
| C  | -2.282120 | 6.182100  | -3.679502 |
| H  | -2.650844 | 6.718615  | -5.749105 |
| H  | -2.473118 | 7.198011  | -3.300507 |
| C  | 5.594107  | 9.742870  | 1.492732  |
| C  | 6.274348  | 8.664891  | 0.897255  |
| C  | 4.190083  | 9.763422  | 1.510456  |
| H  | 6.163516  | 10.573628 | 1.937286  |
| C  | 3.463366  | 8.705591  | 0.939342  |
| H  | 3.653924  | 10.609626 | 1.966275  |
| C  | 4.139335  | 7.621238  | 0.349817  |
| H  | 2.363637  | 8.714118  | 0.932936  |
| C  | 5.551293  | 7.608340  | 0.324530  |
| H  | 6.086842  | 6.779351  | -0.164376 |
| H  | 7.374950  | 8.652369  | 0.872560  |
| C  | 4.239018  | 7.114796  | -2.822650 |
| C  | 3.989702  | 5.993680  | -2.004455 |
| C  | 4.743493  | 6.940596  | -4.119327 |
| H  | 4.028393  | 8.126026  | -2.441456 |
| C  | 4.993782  | 5.648089  | -4.613287 |
| H  | 4.937688  | 7.820715  | -4.751370 |
| C  | 4.733893  | 4.529620  | -3.805296 |
| H  | 5.383671  | 5.513399  | -5.633753 |
| C  | 4.231942  | 4.698084  | -2.504913 |
| H  | 4.915041  | 3.514416  | -4.190323 |
| H  | 4.002157  | 3.813388  | -1.892201 |
| C  | 2.472526  | 1.285460  | 0.535347  |
| C  | 2.741274  | -0.107382 | 0.548203  |
| C  | 3.530784  | 2.287582  | 0.583616  |
| C  | 4.872262  | 1.808903  | 0.644430  |
| C  | 5.124357  | 0.436715  | 0.628191  |
| H  | 5.702345  | 2.527694  | 0.697113  |
| C  | 4.077298  | -0.518759 | 0.576912  |
| H  | 6.167008  | 0.084472  | 0.659403  |
| H  | 4.319082  | -1.592837 | 0.564470  |
| P  | -1.645664 | 5.564689  | -1.008423 |
| P  | 3.165406  | 6.236562  | -0.376603 |
| N  | 1.191082  | 1.749885  | 0.428764  |
| N  | -1.128725 | 2.986992  | 0.013888  |
| N  | 3.120363  | 3.578301  | 0.562798  |
| C  | 1.568783  | -1.079196 | 0.554068  |
| H  | 1.775215  | -1.924104 | -0.137503 |
| H  | 1.503560  | -1.545551 | 1.565866  |
| C  | 3.938618  | 4.758817  | 0.608282  |
| H  | 4.941357  | 4.599236  | 0.156498  |
| H  | 4.097121  | 5.128138  | 1.647629  |
| C  | -2.217206 | 3.902198  | -0.192836 |
| H  | -2.726423 | 4.181518  | 0.758173  |
| H  | -2.991499 | 3.493494  | -0.877243 |
| Bi | 0.860327  | 3.924669  | 0.646118  |
| W  | 0.684994  | 6.361894  | -0.609181 |
| C  | 1.029464  | 5.709680  | -2.529579 |
| C  | 0.536656  | 8.193350  | -1.337734 |
| C  | 0.327282  | 7.155881  | 1.232572  |
| O  | 0.117246  | 7.653926  | 2.275510  |
| O  | 1.221505  | 5.381083  | -3.630187 |
| O  | 0.450222  | 9.284280  | -1.770355 |

>

84

Coordinates from ORCA-job W-scan1 Relaxed Surface  
Scan Step 7

|   |           |           |           |
|---|-----------|-----------|-----------|
| C | -2.320628 | 0.775268  | -0.161385 |
| C | -2.205010 | -0.613287 | -0.056573 |
| C | -1.161807 | 1.593602  | -0.054967 |
| H | -3.300554 | 1.243874  | -0.331602 |
| C | 0.106473  | 0.920819  | 0.189295  |
| C | 0.209782  | -0.486040 | 0.317311  |
| C | -0.959095 | -1.244466 | 0.177518  |
| H | -0.909391 | -2.341769 | 0.254432  |
| H | -3.108806 | -1.234173 | -0.155278 |
| C | -5.341045 | 8.134913  | 0.097729  |
| C | -5.520109 | 6.952707  | -0.643565 |
| C | -4.049337 | 8.542218  | 0.468649  |
| H | -6.213628 | 8.744016  | 0.379791  |
| C | -2.935419 | 7.767436  | 0.105362  |
| H | -3.903940 | 9.471450  | 1.040165  |
| C | -3.110302 | 6.579547  | -0.628835 |
| H | -1.916742 | 8.080998  | 0.376504  |
| C | -4.409755 | 6.177586  | -1.008786 |
| H | -4.551867 | 5.266529  | -1.611006 |
| H | -6.531022 | 6.637385  | -0.944634 |
| C | -1.587655 | 3.938922  | -3.382297 |
| C | -1.921273 | 5.203919  | -2.855507 |
| C | -1.671540 | 3.710044  | -4.764655 |
| H | -1.235168 | 3.137954  | -2.714310 |
| C | -2.083688 | 4.738279  | -5.627933 |
| H | -1.405566 | 2.721416  | -5.169136 |
| C | -2.407988 | 6.002254  | -5.104938 |
| H | -2.144474 | 4.557777  | -6.711989 |
| C | -2.324017 | 6.237962  | -3.724832 |
| H | -2.724187 | 6.813914  | -5.778007 |
| H | -2.564035 | 7.232063  | -3.317047 |
| C | 5.625717  | 9.667366  | 1.537039  |
| C | 6.298492  | 8.609573  | 0.898579  |
| C | 4.221886  | 9.692675  | 1.563142  |
| H | 6.200771  | 10.478784 | 2.009138  |
| C | 3.487913  | 8.659864  | 0.956846  |
| H | 3.691530  | 10.523267 | 2.053113  |
| C | 4.156653  | 7.595397  | 0.324121  |
| H | 2.388188  | 8.672934  | 0.956810  |
| C | 5.568408  | 7.577313  | 0.291462  |
| H | 6.098241  | 6.764315  | -0.229333 |
| H | 7.398862  | 8.593500  | 0.867817  |
| C | 4.293793  | 7.166890  | -2.858368 |
| C | 3.983031  | 6.031686  | -2.082517 |
| C | 4.780790  | 7.012749  | -4.164618 |
| H | 4.144891  | 8.173476  | -2.437973 |
| C | 4.953111  | 5.727923  | -4.708611 |
| H | 5.022446  | 7.903492  | -4.764594 |
| C | 4.633294  | 4.595999  | -3.941246 |
| H | 5.329338  | 5.609938  | -5.736222 |
| C | 4.147769  | 4.743504  | -2.632469 |
| H | 4.755272  | 3.587559  | -4.365385 |
| H | 3.870465  | 3.853226  | -2.047269 |
| C | 2.488444  | 1.253970  | 0.502499  |
| C | 2.739479  | -0.132144 | 0.650448  |
| C | 3.547024  | 2.252202  | 0.563801  |
| C | 4.871150  | 1.781207  | 0.784664  |

|    |           |           |           |
|----|-----------|-----------|-----------|
| C  | 5.111669  | 0.410176  | 0.906764  |
| H  | 5.698345  | 2.502336  | 0.852009  |
| C  | 4.065250  | -0.541628 | 0.839380  |
| H  | 6.143703  | 0.060122  | 1.063144  |
| H  | 4.295604  | -1.613631 | 0.940397  |
| P  | -1.637223 | 5.569064  | -1.074874 |
| P  | 3.173080  | 6.242030  | -0.444012 |
| N  | 1.216375  | 1.717980  | 0.291810  |
| N  | -1.101024 | 2.948781  | -0.146419 |
| N  | 3.148224  | 3.542921  | 0.409983  |
| C  | 1.572235  | -1.110747 | 0.594249  |
| H  | 1.782266  | -1.889187 | -0.173317 |
| H  | 1.523324  | -1.668080 | 1.557664  |
| C  | 3.952506  | 4.729191  | 0.497281  |
| H  | 4.952152  | 4.595649  | 0.028277  |
| H  | 4.116824  | 5.066847  | 1.546891  |
| C  | -2.190577 | 3.870197  | -0.306579 |
| H  | -2.698560 | 4.113950  | 0.655318  |
| H  | -2.965624 | 3.488378  | -1.007022 |
| Bi | 0.905824  | 3.885406  | 0.348318  |
| W  | 0.687859  | 6.399199  | -0.674489 |
| C  | 1.009314  | 5.952108  | -2.657426 |
| C  | 0.505829  | 8.281446  | -1.250569 |
| C  | 0.343272  | 7.068077  | 1.219496  |
| O  | 0.138637  | 7.515114  | 2.285440  |
| O  | 1.183363  | 5.763852  | -3.792929 |
| O  | 0.398472  | 9.402242  | -1.590942 |

>

84

Coordinates from ORCA-job W-scan1 Relaxed Surface  
Scan Step 8

|   |           |           |           |
|---|-----------|-----------|-----------|
| C | -2.332854 | 0.769011  | -0.027442 |
| C | -2.234381 | -0.607597 | 0.200907  |
| C | -1.157590 | 1.565670  | -0.072760 |
| H | -3.313866 | 1.243613  | -0.173979 |
| C | 0.112443  | 0.891561  | 0.142801  |
| C | 0.202984  | -0.499294 | 0.386218  |
| C | -0.986430 | -1.240875 | 0.406300  |
| H | -0.947549 | -2.326770 | 0.584679  |
| H | -3.153419 | -1.213223 | 0.224794  |
| C | -5.337459 | 8.066135  | 0.142768  |
| C | -5.513220 | 6.916760  | -0.649075 |
| C | -4.046831 | 8.461178  | 0.530509  |
| H | -6.211799 | 8.659548  | 0.451491  |
| C | -2.930595 | 7.707146  | 0.132719  |
| H | -3.904120 | 9.365040  | 1.141931  |
| C | -3.102477 | 6.551626  | -0.652255 |
| H | -1.913002 | 8.012712  | 0.416483  |
| C | -4.400748 | 6.161534  | -1.048067 |
| H | -4.540106 | 5.276108  | -1.687944 |
| H | -6.523272 | 6.611345  | -0.962877 |
| C | -1.578264 | 3.982812  | -3.479194 |
| C | -1.921925 | 5.232981  | -2.924157 |
| C | -1.664537 | 3.783446  | -4.866099 |
| H | -1.220361 | 3.170106  | -2.828167 |
| C | -2.089286 | 4.826286  | -5.705500 |
| H | -1.391743 | 2.806102  | -5.292876 |
| C | -2.425193 | 6.074964  | -5.153928 |
| H | -2.151535 | 4.669021  | -6.793069 |

|    |           |           |           |
|----|-----------|-----------|-----------|
| C  | -2.339050 | 6.281402  | -3.769296 |
| H  | -2.751864 | 6.897807  | -5.808117 |
| H  | -2.587698 | 7.263988  | -3.339303 |
| C  | 5.624711  | 9.603758  | 1.575052  |
| C  | 6.299994  | 8.572527  | 0.897145  |
| C  | 4.220885  | 9.620542  | 1.608561  |
| H  | 6.197676  | 10.401385 | 2.072467  |
| C  | 3.489440  | 8.605849  | 0.969737  |
| H  | 3.688506  | 10.430629 | 2.129618  |
| C  | 4.161030  | 7.567657  | 0.297412  |
| H  | 2.389725  | 8.613782  | 0.974901  |
| C  | 5.572647  | 7.557754  | 0.258071  |
| H  | 6.104021  | 6.765521  | -0.292256 |
| H  | 7.400246  | 8.563400  | 0.860896  |
| C  | 4.311914  | 7.210928  | -2.900246 |
| C  | 3.995999  | 6.059520  | -2.150654 |
| C  | 4.798094  | 7.084641  | -4.209757 |
| H  | 4.166842  | 8.208355  | -2.457266 |
| C  | 4.965178  | 5.811891  | -4.782900 |
| H  | 5.042951  | 7.987846  | -4.789419 |
| C  | 4.642069  | 4.663970  | -4.040990 |
| H  | 5.340668  | 5.715861  | -5.813043 |
| C  | 4.157032  | 4.783347  | -2.729039 |
| H  | 4.762472  | 3.664931  | -4.487282 |
| H  | 3.881245  | 3.881415  | -2.160778 |
| C  | 2.500667  | 1.225405  | 0.454132  |
| C  | 2.730712  | -0.146121 | 0.714971  |
| C  | 3.553388  | 2.224413  | 0.542078  |
| C  | 4.849610  | 1.773028  | 0.908296  |
| C  | 5.072331  | 0.413550  | 1.151309  |
| H  | 5.670403  | 2.499369  | 0.997027  |
| C  | 4.031525  | -0.539712 | 1.058463  |
| H  | 6.084163  | 0.077760  | 1.425957  |
| H  | 4.243630  | -1.601507 | 1.258712  |
| P  | -1.628336 | 5.563467  | -1.138992 |
| P  | 3.182374  | 6.235167  | -0.510616 |
| N  | 1.239994  | 1.677887  | 0.144932  |
| N  | -1.083574 | 2.911984  | -0.279812 |
| N  | 3.172920  | 3.507561  | 0.278472  |
| C  | 1.576944  | -1.132101 | 0.573848  |
| H  | 1.783279  | -1.802146 | -0.293849 |
| H  | 1.556525  | -1.807743 | 1.456654  |
| C  | 3.955784  | 4.702962  | 0.411341  |
| H  | 4.967273  | 4.596454  | -0.040656 |
| H  | 4.091707  | 5.021851  | 1.471148  |
| C  | -2.166689 | 3.847040  | -0.389946 |
| H  | -2.646434 | 4.078616  | 0.589643  |
| H  | -2.964120 | 3.489229  | -1.079087 |
| Bi | 0.952544  | 3.828223  | 0.041974  |
| W  | 0.696289  | 6.403480  | -0.747584 |
| C  | 0.999766  | 6.124656  | -2.763952 |
| C  | 0.482638  | 8.321498  | -1.172660 |
| C  | 0.369533  | 6.931249  | 1.194932  |
| O  | 0.175083  | 7.303317  | 2.290201  |
| O  | 1.163468  | 6.033785  | -3.912698 |
| O  | 0.355288  | 9.463298  | -1.423776 |

>  
84

Coordinates from ORCA-job W-scan1 Relaxed Surface  
Scan Step 9

|   |           |           |           |
|---|-----------|-----------|-----------|
| C | -2.329524 | 0.780370  | 0.060938  |
| C | -2.239378 | -0.583045 | 0.365378  |
| C | -1.148085 | 1.553270  | -0.086885 |
| H | -3.310044 | 1.262746  | -0.062240 |
| C | 0.120258  | 0.872391  | 0.099227  |
| C | 0.204932  | -0.503629 | 0.413325  |
| C | -0.991862 | -1.223263 | 0.543518  |
| H | -0.956957 | -2.296361 | 0.787825  |
| H | -3.164647 | -1.169686 | 0.473326  |
| C | -5.313472 | 8.026464  | 0.182631  |
| C | -5.495322 | 6.908734  | -0.651856 |
| C | -4.020680 | 8.400728  | 0.583769  |
| H | -6.184740 | 8.611815  | 0.514509  |
| C | -2.908256 | 7.657724  | 0.156067  |
| H | -3.873333 | 9.280122  | 1.228820  |
| C | -3.086626 | 6.533520  | -0.671919 |
| H | -1.889182 | 7.948296  | 0.449858  |
| C | -4.386819 | 6.163815  | -1.080373 |
| H | -4.530277 | 5.302865  | -1.751939 |
| H | -6.507069 | 6.619860  | -0.975631 |
| C | -1.625706 | 3.991154  | -3.549103 |
| C | -1.934534 | 5.242899  | -2.977607 |
| C | -1.728438 | 3.809241  | -4.937640 |
| H | -1.286349 | 3.160938  | -2.910252 |
| C | -2.136303 | 4.870601  | -5.761865 |
| H | -1.483475 | 2.830124  | -5.377073 |
| C | -2.439464 | 6.120358  | -5.193683 |
| H | -2.211798 | 4.726709  | -6.850435 |
| C | -2.335889 | 6.309499  | -3.808011 |
| H | -2.753415 | 6.957412  | -5.835900 |
| H | -2.557609 | 7.292928  | -3.365195 |
| C | 5.607949  | 9.563185  | 1.600857  |
| C | 6.288877  | 8.563665  | 0.882475  |
| C | 4.204492  | 9.559127  | 1.651784  |
| H | 6.175962  | 10.352762 | 2.116429  |
| C | 3.479005  | 8.555628  | 0.989135  |
| H | 3.667646  | 10.344720 | 2.204750  |
| C | 4.156808  | 7.549031  | 0.275980  |
| H | 2.379525  | 8.549350  | 1.007550  |
| C | 5.567763  | 7.559408  | 0.220093  |
| H | 6.102408  | 6.791466  | -0.360643 |
| H | 7.388605  | 8.571034  | 0.832983  |
| C | 4.308919  | 7.233799  | -2.938066 |
| C | 4.016832  | 6.071513  | -2.195015 |
| C | 4.803775  | 7.125814  | -4.245711 |
| H | 4.137053  | 8.225351  | -2.491300 |
| C | 5.003418  | 5.860138  | -4.824389 |
| H | 5.029183  | 8.037438  | -4.819989 |
| C | 4.705669  | 4.701335  | -4.089050 |
| H | 5.385276  | 5.778106  | -5.853390 |
| C | 4.212574  | 4.802512  | -2.778190 |
| H | 4.853837  | 3.707558  | -4.538762 |
| H | 3.961765  | 3.890757  | -2.213976 |
| C | 2.510224  | 1.207675  | 0.415953  |
| C | 2.723865  | -0.150348 | 0.746696  |
| C | 3.550815  | 2.212525  | 0.535799  |
| C | 4.819112  | 1.783079  | 1.007090  |

|    |           |           |           |
|----|-----------|-----------|-----------|
| C  | 5.026772  | 0.435994  | 1.326379  |
| H  | 5.630463  | 2.516635  | 1.120777  |
| C  | 3.996400  | -0.523736 | 1.203216  |
| H  | 6.017045  | 0.117996  | 1.687159  |
| H  | 4.192007  | -1.574371 | 1.468428  |
| P  | -1.619105 | 5.554554  | -1.193133 |
| P  | 3.189098  | 6.226962  | -0.560293 |
| N  | 1.260422  | 1.643752  | 0.032151  |
| N  | -1.067186 | 2.888601  | -0.368146 |
| N  | 3.185892  | 3.485447  | 0.196637  |
| C  | 1.582680  | -1.140516 | 0.548534  |
| H  | 1.788416  | -1.738439 | -0.371915 |
| H  | 1.576786  | -1.880233 | 1.376967  |
| C  | 3.946079  | 4.690141  | 0.365692  |
| H  | 4.976729  | 4.603639  | -0.047054 |
| H  | 4.033849  | 5.004706  | 1.432001  |
| C  | -2.141504 | 3.836485  | -0.438899 |
| H  | -2.579015 | 4.075322  | 0.558718  |
| H  | -2.970439 | 3.491343  | -1.097603 |
| Bi | 0.998423  | 3.768250  | -0.241780 |
| W  | 0.707280  | 6.391598  | -0.814623 |
| C  | 0.992272  | 6.260025  | -2.847767 |
| C  | 0.479048  | 8.331695  | -1.099788 |
| C  | 0.393257  | 6.778706  | 1.164169  |
| O  | 0.205703  | 7.071512  | 2.283601  |
| O  | 1.144546  | 6.252075  | -4.001888 |
| O  | 0.343069  | 9.488202  | -1.264025 |

### 3-TS

|   |           |           |           |
|---|-----------|-----------|-----------|
| C | -2.328293 | 0.779823  | 0.068879  |
| C | -2.242342 | -0.576963 | 0.398102  |
| C | -1.145771 | 1.548507  | -0.085880 |
| H | -3.307448 | 1.260743  | -0.068967 |
| C | 0.119375  | 0.870192  | 0.121038  |
| C | 0.199792  | -0.499731 | 0.459346  |
| C | -0.998023 | -1.214864 | 0.594764  |
| H | -0.965669 | -2.283298 | 0.858448  |
| H | -3.169023 | -1.160057 | 0.511174  |
| C | -5.318419 | 7.979902  | 0.222704  |
| C | -5.503204 | 6.859277  | -0.605094 |
| C | -4.023054 | 8.371778  | 0.592995  |
| H | -6.189711 | 8.553686  | 0.573651  |
| C | -2.911054 | 7.643132  | 0.142268  |
| H | -3.872762 | 9.254097  | 1.233154  |
| C | -3.091145 | 6.515353  | -0.679402 |
| H | -1.890222 | 7.948733  | 0.414678  |
| C | -4.395263 | 6.129403  | -1.057493 |
| H | -4.543808 | 5.265912  | -1.724658 |
| H | -6.517665 | 6.555647  | -0.905543 |
| C | -1.701951 | 4.004549  | -3.610015 |
| C | -1.976919 | 5.253677  | -3.017257 |
| C | -1.854923 | 3.834153  | -4.994833 |
| H | -1.351378 | 3.163550  | -2.991412 |
| C | -2.279427 | 4.904719  | -5.796385 |
| H | -1.636876 | 2.855589  | -5.449071 |
| C | -2.548033 | 6.152166  | -5.209040 |
| H | -2.395765 | 4.769444  | -6.882303 |
| C | -2.394669 | 6.329363  | -3.827106 |

|    |           |           |           |
|----|-----------|-----------|-----------|
| H  | -2.876113 | 6.997323  | -5.833093 |
| H  | -2.594580 | 7.311480  | -3.371119 |
| C  | 5.614915  | 9.523111  | 1.637477  |
| C  | 6.297885  | 8.520706  | 0.927602  |
| C  | 4.212025  | 9.535334  | 1.658099  |
| H  | 6.181121  | 10.302203 | 2.170361  |
| C  | 3.489071  | 8.544978  | 0.974640  |
| H  | 3.672689  | 10.323583 | 2.204587  |
| C  | 4.168085  | 7.534536  | 0.269323  |
| H  | 2.389245  | 8.552591  | 0.971989  |
| C  | 5.579462  | 7.530265  | 0.243645  |
| H  | 6.118743  | 6.760559  | -0.330400 |
| H  | 7.398274  | 8.514536  | 0.901277  |
| C  | 4.363592  | 7.263642  | -2.943598 |
| C  | 4.063641  | 6.090602  | -2.221421 |
| C  | 4.899819  | 7.177412  | -4.235738 |
| H  | 4.169279  | 8.248663  | -2.491518 |
| C  | 5.134743  | 5.922567  | -4.821742 |
| H  | 5.131759  | 8.098718  | -4.791402 |
| C  | 4.829839  | 4.752864  | -4.109267 |
| H  | 5.550843  | 5.857380  | -5.838435 |
| C  | 4.294958  | 4.832574  | -2.813996 |
| H  | 5.006050  | 3.766325  | -4.564421 |
| H  | 4.042070  | 3.909321  | -2.269530 |
| C  | 2.506804  | 1.205637  | 0.439734  |
| C  | 2.716534  | -0.146282 | 0.794546  |
| C  | 3.549823  | 2.208335  | 0.540908  |
| C  | 4.815684  | 1.783302  | 1.020735  |
| C  | 5.019124  | 0.442755  | 1.364508  |
| H  | 5.629404  | 2.515951  | 1.121520  |
| C  | 3.986911  | -0.514906 | 1.257994  |
| H  | 6.008012  | 0.128581  | 1.731819  |
| H  | 4.178678  | -1.561105 | 1.542269  |
| P  | -1.622746 | 5.546479  | -1.232297 |
| P  | 3.204817  | 6.221331  | -0.595640 |
| N  | 1.260174  | 1.637050  | 0.046235  |
| N  | -1.062863 | 2.877491  | -0.391834 |
| N  | 3.190991  | 3.475410  | 0.177369  |
| C  | 1.573686  | -1.135205 | 0.616189  |
| H  | 1.781411  | -1.758093 | -0.286753 |
| H  | 1.561927  | -1.854180 | 1.462549  |
| C  | 3.955345  | 4.677307  | 0.329359  |
| H  | 4.983489  | 4.583766  | -0.088778 |
| H  | 4.053628  | 4.999456  | 1.392727  |
| C  | -2.136379 | 3.821708  | -0.480105 |
| H  | -2.586120 | 4.063495  | 0.511604  |
| H  | -2.958879 | 3.470825  | -1.144268 |
| Bi | 1.004575  | 3.755347  | -0.270936 |
| W  | 0.714581  | 6.382855  | -0.859416 |
| C  | 0.999160  | 6.256263  | -2.891591 |
| C  | 0.486345  | 8.321976  | -1.144483 |
| C  | 0.398528  | 6.786263  | 1.115413  |
| O  | 0.209006  | 7.097392  | 2.228987  |
| O  | 1.150781  | 6.254113  | -4.045713 |
| O  | 0.350084  | 9.478493  | -1.304526 |

### 4

|     |          |           |          |
|-----|----------|-----------|----------|
| 170 |          |           |          |
| Au  | 5.390510 | 12.445974 | 9.915442 |

|    |           |           |           |   |           |           |           |
|----|-----------|-----------|-----------|---|-----------|-----------|-----------|
| Au | 6.262749  | 6.805767  | 7.823897  | H | 5.634310  | 9.825260  | 5.644840  |
| Au | 0.557476  | 8.732277  | 9.106963  | C | 11.973820 | 10.654390 | 8.630690  |
| Cl | 4.364545  | 8.739757  | 10.525611 | C | 0.532410  | 12.618950 | 11.932380 |
| Cl | 4.033731  | 9.957498  | 7.357915  | C | 1.067670  | 3.814150  | 5.666220  |
| Bi | 6.801430  | 9.789140  | 8.834340  | C | 2.536650  | 1.485930  | 8.354280  |
| Bi | 2.479990  | 11.164970 | 9.840770  | H | 2.226680  | 0.487940  | 8.012550  |
| Bi | 3.104130  | 7.062020  | 8.163520  | C | 2.589500  | 3.899220  | 8.071840  |
| P  | 5.975450  | 11.823800 | 12.114840 | C | 3.702610  | 2.847570  | 10.004380 |
| P  | 4.954710  | 13.503400 | 7.849920  | H | 4.281840  | 2.912820  | 10.935080 |
| P  | 6.377910  | 5.689600  | 9.901290  | C | 13.081820 | 9.569150  | 8.691270  |
| P  | 6.417520  | 7.560700  | 5.593950  | H | 12.633670 | 8.559910  | 8.781790  |
| P  | 0.123020  | 9.329330  | 6.864580  | H | 13.708310 | 9.588020  | 7.777840  |
| P  | 0.545510  | 8.063530  | 11.371090 | H | 13.747620 | 9.729740  | 9.562170  |
| N  | 7.677770  | 9.992840  | 11.049460 | C | -0.912970 | 13.309660 | 13.759720 |
| N  | 9.060520  | 10.164200 | 8.746010  | H | -1.563350 | 14.056530 | 14.237250 |
| N  | 1.128430  | 12.807390 | 10.705830 | C | 11.161970 | 10.603490 | 9.930490  |
| N  | 2.306450  | 5.056100  | 7.381350  | C | 11.668740 | 10.379230 | 6.121370  |
| N  | 2.321150  | 12.990260 | 8.297880  | H | 12.751130 | 10.534170 | 6.005840  |
| C  | 9.692530  | 10.200150 | 7.523520  | C | 4.992780  | 7.143510  | 4.518680  |
| N  | 3.694150  | 5.302210  | 9.676690  | C | -1.420980 | 8.531150  | 6.268150  |
| N  | 7.524140  | 9.850850  | 6.557040  | C | 0.517070  | 6.299540  | 4.388500  |
| N  | 1.621650  | 10.482210 | 11.965480 | H | 0.298770  | 7.245070  | 3.874290  |
| N  | 1.886010  | 7.401630  | 6.133380  | C | 0.057240  | 16.222630 | 9.739310  |
| C  | 1.322270  | 6.298690  | 5.564170  | H | -0.541760 | 17.065540 | 10.112940 |
| C  | 4.592150  | 11.792120 | 13.317380 | C | -1.118440 | 8.310230  | 12.110870 |
| C  | 0.946520  | 13.976140 | 10.001370 | C | -0.305790 | 13.600570 | 12.531430 |
| C  | 1.578300  | 5.024430  | 6.213450  | C | 2.176830  | 2.617380  | 7.611300  |
| C  | 0.978210  | 6.308130  | 11.677310 | C | -0.534990 | 14.961780 | 11.864900 |
| C  | 6.795000  | 10.147540 | 12.174230 | C | 10.881350 | 10.160290 | 4.972030  |
| H  | 7.279060  | 10.029150 | 13.169060 | C | 6.994200  | 3.974890  | 9.654650  |
| H  | 5.954460  | 9.425470  | 12.103340 | C | -2.057740 | 15.178900 | 11.660890 |
| C  | 1.713340  | 9.108140  | 12.383650 | H | -2.478560 | 14.392890 | 11.003170 |
| H  | 1.502820  | 8.931590  | 13.461910 | H | -2.599310 | 15.147330 | 12.626720 |
| H  | 2.724750  | 8.711150  | 12.153330 | H | -2.260120 | 16.163160 | 11.194640 |
| C  | -0.083050 | 11.124570 | 6.553390  | C | 11.070030 | 10.783920 | 12.370730 |
| C  | 1.480200  | 8.724170  | 5.737140  | C | 0.294890  | 3.875370  | 4.499530  |
| H  | 1.132110  | 8.812100  | 4.683930  | H | -0.107280 | 2.950120  | 4.062470  |
| H  | 2.318460  | 9.436730  | 5.889900  | C | 3.358890  | 4.035530  | 9.296410  |
| C  | 6.145540  | 13.146770 | 6.502760  | C | 7.212500  | 13.002390 | 12.792200 |
| C  | 4.691310  | 5.519610  | 10.691000 | C | -0.706480 | 12.070700 | 14.400950 |
| H  | 4.745990  | 4.728260  | 11.471310 | C | 0.705280  | 16.341690 | 8.492550  |
| H  | 4.522300  | 6.495990  | 11.189560 | C | 11.794870 | 10.818750 | 11.161450 |
| C  | 3.247400  | 13.098040 | 7.202400  | H | 12.875250 | 11.020670 | 11.191560 |
| H  | 2.977580  | 13.855050 | 6.432920  | C | 1.358990  | 2.460320  | 6.323870  |
| H  | 3.367700  | 12.115040 | 6.703040  | C | 9.505720  | 9.969140  | 5.075500  |
| C  | 9.005340  | 10.283320 | 11.155180 | H | 8.912660  | 9.813090  | 4.164360  |
| C  | 7.492140  | 6.435120  | 11.151850 | C | 0.019450  | 5.106780  | 3.869810  |
| C  | 8.863000  | 9.996870  | 6.347240  | C | 2.165200  | 1.589490  | 5.322420  |
| C  | 0.116190  | 11.101990 | 13.831640 | H | 2.382670  | 0.590330  | 5.749240  |
| H  | 0.271110  | 10.148900 | 14.354780 | H | 1.599550  | 1.443750  | 4.380820  |
| C  | 7.896540  | 6.828890  | 4.784510  | H | 3.129430  | 2.075310  | 5.073260  |
| C  | 0.772560  | 11.346370 | 12.590650 | C | 9.763040  | 10.344930 | 9.916170  |
| C  | 4.985920  | 15.328960 | 8.067490  | C | 3.293600  | 1.600590  | 9.538520  |
| C  | 11.095370 | 10.402680 | 7.399220  | C | 0.166350  | 15.054740 | 10.504720 |
| C  | 1.471860  | 15.295400 | 7.985710  | C | 0.015470  | 1.763730  | 6.667410  |
| H  | 1.958430  | 15.407640 | 7.007610  | H | -0.571300 | 2.378600  | 7.378190  |
| C  | 1.610920  | 14.078510 | 8.713760  | H | -0.597780 | 1.607490  | 5.758140  |
| C  | 6.654100  | 9.410480  | 5.500080  | H | 0.189050  | 0.772850  | 7.131390  |
| H  | 6.997520  | 9.668600  | 4.473700  | C | 0.036940  | 16.066230 | 12.795190 |

|   |           |           |           |
|---|-----------|-----------|-----------|
| H | -0.454030 | 16.040420 | 13.788340 |
| H | 1.125380  | 15.922630 | 12.945450 |
| H | -0.120770 | 17.073350 | 12.360630 |
| C | 12.618330 | 12.060750 | 8.497630  |
| H | 13.227470 | 12.130820 | 7.574680  |
| H | 11.836460 | 12.844660 | 8.454520  |
| H | 13.278680 | 12.279500 | 9.360040  |
| C | 9.701540  | 10.525590 | 12.374840 |
| H | 9.161450  | 10.492970 | 13.330670 |
| H | 4.813130  | 15.846770 | 7.102600  |
| H | 5.968630  | 15.632380 | 8.479370  |
| H | 4.191240  | 15.616130 | 8.782780  |
| H | 5.828010  | 13.619470 | 5.551750  |
| H | 6.227150  | 12.048970 | 6.383410  |
| H | 7.143220  | 13.531910 | 6.791150  |
| H | 7.963690  | 7.145580  | 3.724270  |
| H | 7.838980  | 5.724000  | 4.838720  |
| H | 8.801020  | 7.170120  | 5.324440  |
| H | 6.284560  | 3.430560  | 9.002270  |
| H | 7.081990  | 3.442320  | 10.622980 |
| H | 7.985320  | 4.009670  | 9.160710  |
| H | 8.534940  | 6.384910  | 10.781750 |
| H | 7.418850  | 5.901470  | 12.120640 |
| H | 7.228250  | 7.503710  | 11.274900 |
| H | 3.793200  | 11.130040 | 12.925130 |
| H | 4.169240  | 12.811830 | 13.409250 |
| H | 4.932820  | 11.443070 | 14.312770 |
| H | -1.642630 | 8.829000  | 5.223670  |
| H | -2.263510 | 8.824460  | 6.924840  |
| H | -1.293520 | 7.432390  | 6.314350  |
| H | 8.126450  | 12.952960 | 12.169070 |
| H | 7.471260  | 12.745420 | 13.839010 |
| H | 6.803770  | 14.031160 | 12.752640 |
| H | -0.189410 | 11.335000 | 5.470270  |
| H | 0.790610  | 11.666260 | 6.972130  |
| H | -0.986630 | 11.480060 | 7.086680  |
| H | 5.111880  | 7.581030  | 3.507200  |
| H | 4.063470  | 7.515050  | 4.997050  |
| H | 4.912190  | 6.041780  | 4.436290  |
| H | 0.197060  | 5.663130  | 11.228890 |
| H | 1.050250  | 6.095780  | 12.762900 |
| H | 1.938140  | 6.077200  | 11.170360 |
| H | -1.868840 | 7.742130  | 11.526690 |
| H | -1.368890 | 9.387790  | 12.068900 |
| H | -1.135630 | 7.972690  | 13.166580 |
| H | 11.359420 | 10.146110 | 3.980690  |
| H | 11.593490 | 10.958130 | 13.323180 |
| H | -0.590970 | 5.124340  | 2.954080  |
| H | 3.559860  | 0.694360  | 10.103590 |
| H | 0.600210  | 17.270620 | 7.911630  |
| H | -1.196680 | 11.869670 | 15.365710 |

COF<sub>2</sub>

|   |           |          |           |
|---|-----------|----------|-----------|
| F | -7.865790 | 1.103859 | -0.000012 |
| C | -6.745771 | 1.821083 | -0.000153 |
| F | -5.728540 | 0.964265 | -0.000012 |
| O | -6.668989 | 2.997673 | -0.000364 |

[COF<sub>3</sub>]<sup>-</sup>

|   |           |          |          |
|---|-----------|----------|----------|
| F | -7.843547 | 1.509454 | 0.841369 |
|---|-----------|----------|----------|

|   |           |          |           |
|---|-----------|----------|-----------|
| C | -6.725198 | 1.509468 | -0.083413 |
| F | -5.697268 | 0.911309 | 0.748168  |
| O | -6.456989 | 2.558764 | -0.640669 |
| F | -7.077039 | 0.377675 | -0.920735 |

BH<sub>3</sub>

|   |           |          |           |
|---|-----------|----------|-----------|
| H | -7.821972 | 1.193262 | 0.000069  |
| B | -6.752244 | 1.722119 | -0.000425 |
| H | -5.760377 | 1.058646 | 0.000069  |
| H | -6.674497 | 2.912853 | -0.000252 |

[BH<sub>3</sub>F]<sup>-</sup>

|   |           |          |           |
|---|-----------|----------|-----------|
| F | -7.880583 | 1.565776 | 0.853415  |
| B | -6.726848 | 1.367658 | -0.036650 |
| H | -5.743366 | 0.990323 | 0.628633  |
| H | -6.448930 | 2.438942 | -0.608835 |
| H | -7.000312 | 0.503971 | -0.891843 |

2+F<sup>-</sup>

|   |           |           |           |
|---|-----------|-----------|-----------|
| C | -1.673744 | 1.137943  | -1.119066 |
| C | -1.137526 | -0.046644 | -1.655106 |
| C | -0.858479 | 2.038325  | -0.385659 |
| H | -2.736731 | 1.373559  | -1.275311 |
| C | 0.522907  | 1.677255  | -0.172601 |
| C | 1.046496  | 0.477921  | -0.701655 |
| C | 0.211828  | -0.373499 | -1.454452 |
| H | 0.628524  | -1.307735 | -1.865269 |
| H | -1.789747 | -0.725014 | -2.228819 |
| C | -7.308837 | 6.103479  | -0.664420 |
| C | -6.330532 | 6.891776  | -1.291017 |
| C | -6.914552 | 5.134117  | 0.272840  |
| H | -8.374448 | 6.245978  | -0.901827 |
| C | -5.558227 | 4.958677  | 0.580897  |
| H | -7.671243 | 4.511609  | 0.775860  |
| C | -4.560898 | 5.731345  | -0.060717 |
| H | -5.267158 | 4.209715  | 1.334714  |
| C | -4.970889 | 6.706943  | -0.996020 |
| H | -4.214367 | 7.322784  | -1.505145 |
| H | -6.626506 | 7.657104  | -2.025996 |
| C | -1.891680 | 5.961781  | -2.251550 |
| C | -1.887710 | 6.369441  | -0.900797 |
| C | -1.165898 | 6.678615  | -3.213777 |
| H | -2.464274 | 5.070394  | -2.551733 |
| C | -0.420339 | 7.809461  | -2.840038 |
| H | -1.162684 | 6.338438  | -4.260680 |
| C | -0.400742 | 8.220892  | -1.498660 |
| H | 0.171967  | 8.353144  | -3.591409 |
| C | -1.132671 | 7.504871  | -0.537527 |
| H | 0.211432  | 9.082752  | -1.194096 |
| H | -1.105507 | 7.812246  | 0.520557  |
| C | 8.005115  | 7.878741  | -1.272839 |
| C | 7.447919  | 7.883893  | 0.015117  |
| C | 7.191603  | 7.535824  | -2.367133 |
| H | 9.062167  | 8.146324  | -1.425093 |
| C | 5.846720  | 7.194276  | -2.174263 |
| H | 7.609763  | 7.536225  | -3.386484 |
| C | 5.274044  | 7.167518  | -0.877342 |
| H | 5.221733  | 6.939698  | -3.043809 |
| C | 6.101493  | 7.539337  | 0.209783  |
| H | 5.690420  | 7.561152  | 1.230973  |
| H | 8.067807  | 8.158108  | 0.883668  |



|    |           |           |           |   |           |           |           |
|----|-----------|-----------|-----------|---|-----------|-----------|-----------|
| C  | 1.746142  | 5.113001  | -1.898733 | H | -1.880738 | 2.779806  | -2.069448 |
| C  | 3.118016  | 5.404289  | -1.718974 | C | -2.476653 | 4.217863  | -5.118676 |
| C  | 1.335326  | 3.932364  | -2.541034 | H | -2.259785 | 2.161961  | -4.431226 |
| H  | 0.990179  | 5.823821  | -1.533266 | C | -2.466773 | 5.571290  | -4.739939 |
| C  | 2.291862  | 3.044848  | -3.049238 | H | -2.637716 | 3.938815  | -6.171783 |
| H  | 0.263099  | 3.699511  | -2.617843 | C | -2.256223 | 5.927811  | -3.400916 |
| C  | 3.660901  | 3.350795  | -2.927183 | H | -2.618391 | 6.358799  | -5.494780 |
| H  | 1.969975  | 2.106099  | -3.524688 | H | -2.231693 | 6.990101  | -3.113935 |
| C  | 4.070722  | 4.507628  | -2.253532 | C | 5.120655  | 10.082862 | 1.256524  |
| H  | 4.419596  | 2.648860  | -3.304910 | C | 5.719633  | 8.868103  | 1.624572  |
| H  | 5.143024  | 4.687528  | -2.096459 | C | 3.962473  | 10.074479 | 0.461987  |
| C  | 2.700141  | 2.485031  | 0.432539  | H | 5.554745  | 11.037221 | 1.593341  |
| C  | 3.334671  | 1.322301  | -0.059476 | C | 3.402407  | 8.858862  | 0.044198  |
| C  | 3.472736  | 3.651271  | 0.777661  | H | 3.483623  | 11.022524 | 0.171748  |
| C  | 4.879996  | 3.592740  | 0.625974  | C | 4.002222  | 7.634306  | 0.401578  |
| C  | 5.500394  | 2.435298  | 0.131161  | H | 2.482595  | 8.842150  | -0.561210 |
| H  | 5.487631  | 4.480637  | 0.855009  | C | 5.168094  | 7.650177  | 1.195448  |
| C  | 4.733697  | 1.311172  | -0.217248 | H | 5.656886  | 6.709319  | 1.489139  |
| H  | 6.594963  | 2.417670  | 0.005802  | H | 6.625069  | 8.865889  | 2.251673  |
| H  | 5.220830  | 0.404229  | -0.611643 | C | 3.660964  | 5.935392  | -2.993180 |
| P  | -2.800783 | 5.481867  | 0.448504  | C | 4.244949  | 5.764838  | -1.723486 |
| P  | 3.474336  | 6.861246  | -0.649149 | C | 4.417801  | 5.737281  | -4.158301 |
| N  | 1.320224  | 2.584029  | 0.504201  | H | 2.602002  | 6.225597  | -3.057947 |
| N  | -1.258197 | 3.246829  | 0.125932  | C | 5.767536  | 5.365611  | -4.069592 |
| N  | 2.759256  | 4.752361  | 1.187685  | H | 3.941934  | 5.868178  | -5.142367 |
| C  | 2.478429  | 0.112157  | -0.368235 | C | 6.361768  | 5.204442  | -2.807056 |
| H  | 2.929450  | -0.478837 | -1.195128 | H | 6.358714  | 5.199616  | -4.983696 |
| H  | 2.480578  | -0.573612 | 0.517074  | C | 5.606554  | 5.407999  | -1.643771 |
| C  | 3.339839  | 6.035413  | 1.158387  | H | 7.421009  | 4.914261  | -2.726549 |
| H  | 4.368221  | 6.083331  | 1.589292  | H | 6.092279  | 5.286444  | -0.663567 |
| H  | 2.712154  | 6.756113  | 1.724700  | C | 2.371961  | 1.430811  | 0.208689  |
| C  | -2.598860 | 3.681102  | -0.080320 | C | 2.643296  | 0.138254  | -0.295600 |
| H  | -3.356838 | 3.113736  | 0.523252  | C | 3.426737  | 2.400661  | 0.417363  |
| H  | -2.941287 | 3.580665  | -1.144221 | C | 4.743458  | 2.022235  | 0.043787  |
| Bi | 0.422366  | 4.491160  | 1.225158  | C | 4.997334  | 0.751663  | -0.488683 |
| F  | 0.195194  | 3.799818  | 3.209842  | H | 5.568756  | 2.740516  | 0.155914  |

### 3+F<sup>-</sup>

|   |           |           |           |    |           |           |           |
|---|-----------|-----------|-----------|----|-----------|-----------|-----------|
| C | -2.425778 | 1.024871  | -0.311219 | H  | 6.025206  | 0.488458  | -0.785464 |
| C | -2.276217 | -0.271456 | -0.826503 | H  | 4.177851  | -1.185124 | -1.071053 |
| C | -1.297580 | 1.759154  | 0.142501  | P  | -1.661901 | 5.455403  | -0.691130 |
| H | -3.424773 | 1.484081  | -0.265249 | P  | 3.212085  | 6.067769  | -0.203955 |
| C | -0.009150 | 1.102644  | 0.082667  | N  | 1.084765  | 1.854322  | 0.453350  |
| C | 0.128667  | -0.212470 | -0.415146 | N  | -1.287845 | 3.039171  | 0.619454  |
| C | -1.012793 | -0.887848 | -0.882595 | N  | 3.027348  | 3.585803  | 0.960828  |
| H | -0.909018 | -1.906680 | -1.289180 | C  | 1.502306  | -0.856626 | -0.398276 |
| H | -3.165144 | -0.813105 | -1.187549 | H  | 1.634173  | -1.500097 | -1.295656 |
| C | -4.980629 | 8.656742  | 0.061754  | H  | 1.558303  | -1.558529 | 0.471091  |
| C | -5.334570 | 7.366786  | -0.370738 | C  | 3.835803  | 4.760713  | 1.035801  |
| C | -3.628532 | 8.983388  | 0.247878  | H  | 4.918452  | 4.565731  | 0.878103  |
| H | -5.762574 | 9.409529  | 0.248366  | H  | 3.740782  | 5.256012  | 2.030129  |
| C | -2.631678 | 8.023024  | 0.010768  | C  | -2.314383 | 4.001424  | 0.385959  |
| H | -3.343232 | 9.994075  | 0.578689  | H  | -2.676326 | 4.488060  | 1.321554  |
| C | -2.977944 | 6.728630  | -0.417878 | H  | -3.207733 | 3.584070  | -0.128299 |
| H | -1.567441 | 8.266645  | 0.146263  | Bi | 0.752870  | 3.791892  | 1.477458  |
| C | -4.339486 | 6.409454  | -0.613646 | W  | 0.741783  | 5.991779  | -0.445219 |
| H | -4.619927 | 5.408264  | -0.977262 | C  | 1.059097  | 4.442503  | -1.756264 |
| H | -6.393747 | 7.107604  | -0.525929 | C  | 0.606982  | 7.360709  | -1.826247 |
| C | -2.059342 | 3.576967  | -2.805449 | C  | 0.558991  | 7.351332  | 1.056642  |
| C | -2.061188 | 4.932183  | -2.419010 | O  | 0.500161  | 8.125486  | 1.941031  |
| C | -2.268715 | 3.226004  | -4.148647 | O  | 1.259781  | 3.551128  | -2.485298 |
|   |           |           |           | O  | 0.504383  | 8.192413  | -2.666586 |
|   |           |           |           | F  | 0.675566  | 3.112070  | 3.503511  |

Computational Analysis of **2**

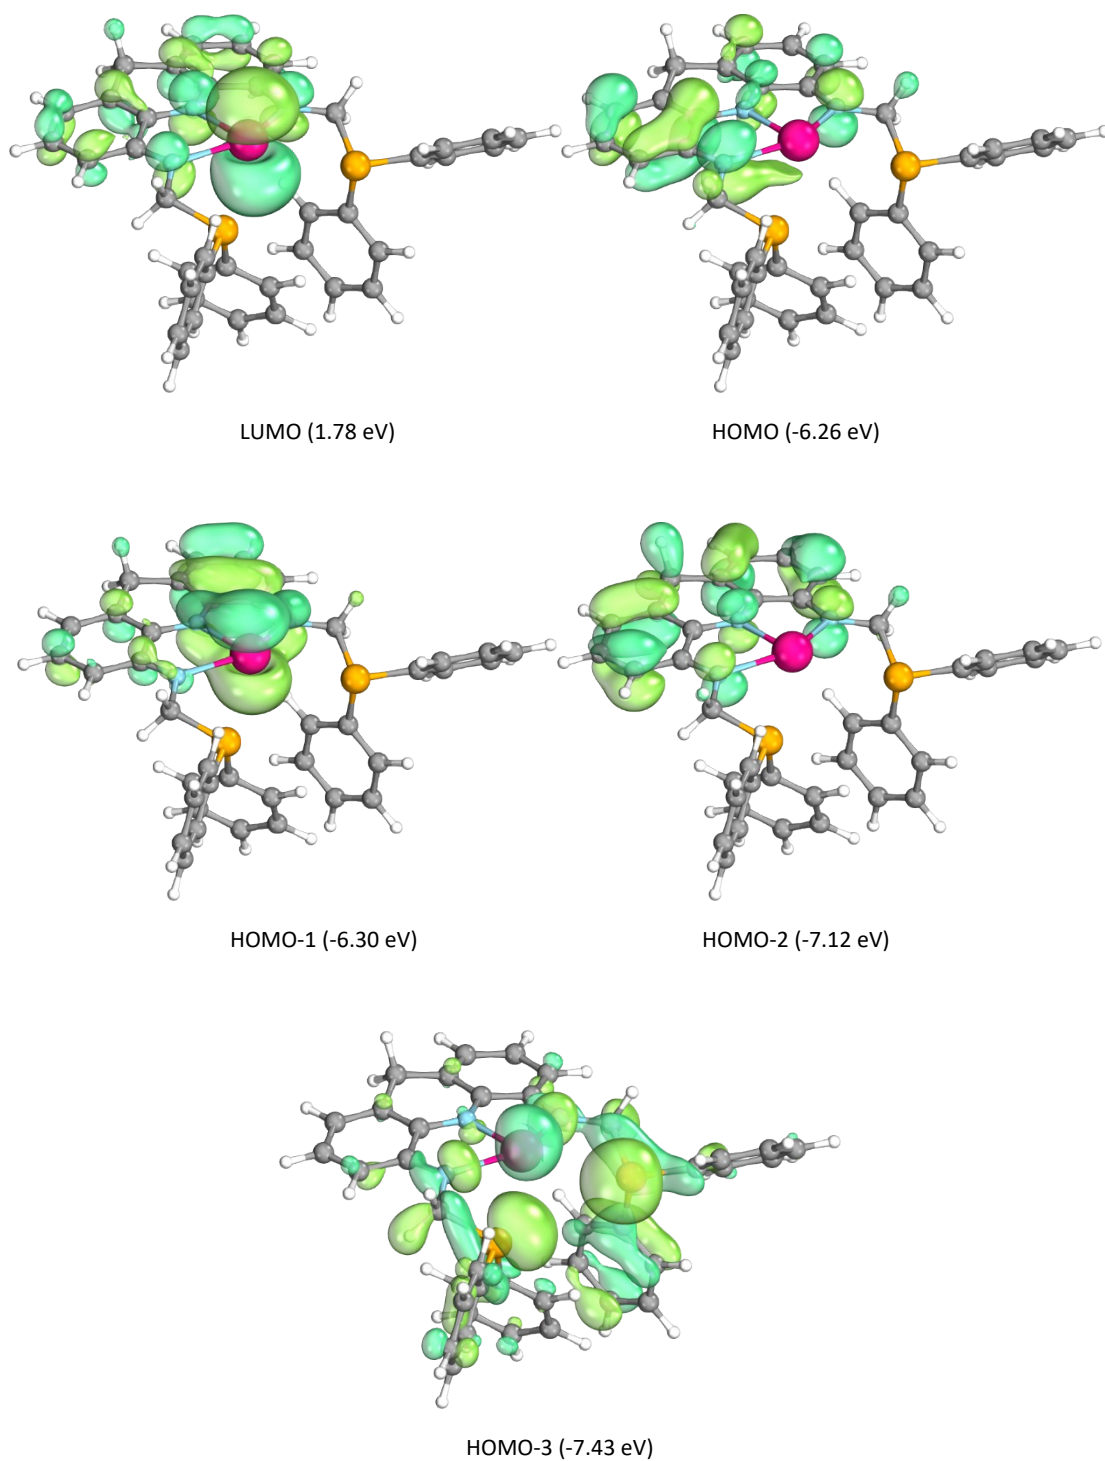

**Figure S43.** Frontier molecular orbitals of **2**.

The ORCA output for the first two transition is given in the following. State 1 can be best described as a HOMO(169a)→LUMO(170a) excitation, while the second has dominant HOMO-1(168a)→LUMO(170a) character. Accumulation of electron density in the difference density plots is depicted in green and depletion in red.

STATE 1: E= 0.087571 au 2.383 eV 19219.6 cm<sup>-1</sup>  
168a -> 170a : 0.129236 (c= 0.35949367)  
169a -> 170a : 0.810314 (c= -0.90017442)

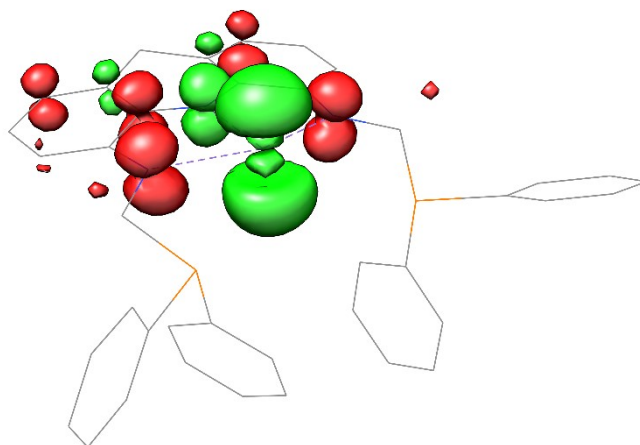

**Figure S44.** Difference density of state 1 of **2**.

STATE 2: E= 0.099761 au 2.715 eV 21895.0 cm<sup>-1</sup>  
166a -> 170a : 0.044033 (c= 0.20984117)  
167a -> 170a : 0.013098 (c= -0.11444465)  
168a -> 170a : 0.721194 (c= -0.84923155)  
169a -> 170a : 0.115918 (c= -0.34046694)  
169a -> 177a : 0.014104 (c= -0.11875971)

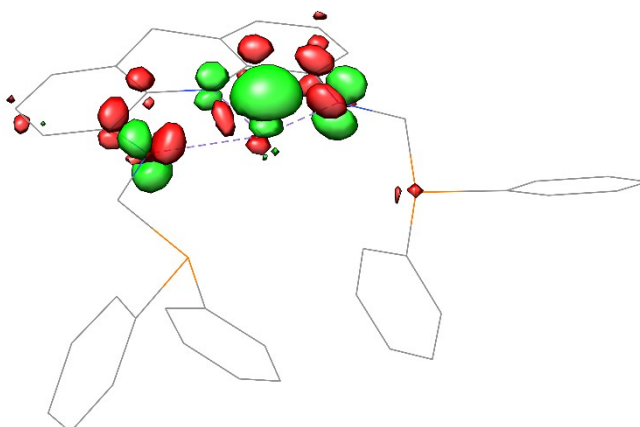

**Figure S45.** Difference density of state 2 of **2**.

To understand the Bi–N bond, we conducted additional CASSCF calculations. We selected an active space with two electrons in two orbitals (CAS(2/2)). These initial orbitals were derived from DFT calculations and represent the Bi–N  $\pi$ -bonding and  $\pi$ -antibonding orbitals. When using natural orbitals for the active space, the resulting CASSCF orbitals closely resemble the DFT orbitals, indicating a lack of significant multireference character. To determine the bond polarity, we transformed the active orbitals into localized orbitals. The resulting wavefunction consists of three resonance structures, with the second structure (II) having a higher weight than the third structure (III), suggesting a slight polarization of the Bi–N bond towards nitrogen. However, the dominant resonance structure (I) indicates a non-polarized, covalent 2c-2e  $\pi$ -bond between Bi and N. The high covalency makes it challenging to assign a formal oxidation state to Bi, but the presence of a Bi(III) center could be justified in extreme cases based on the higher weight of II compared to III.

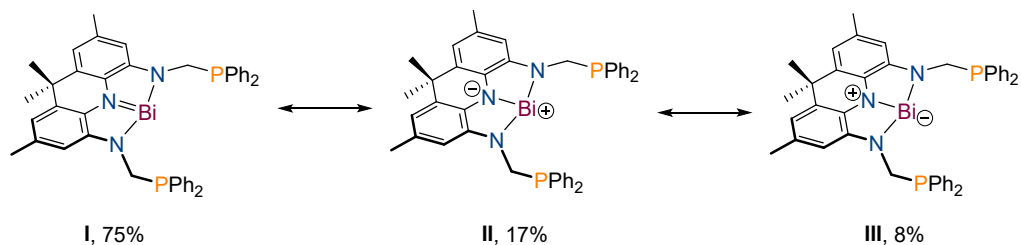

**Figure S46.** Resonance structures of **2** and their respective weights

Computational Analysis of **3**

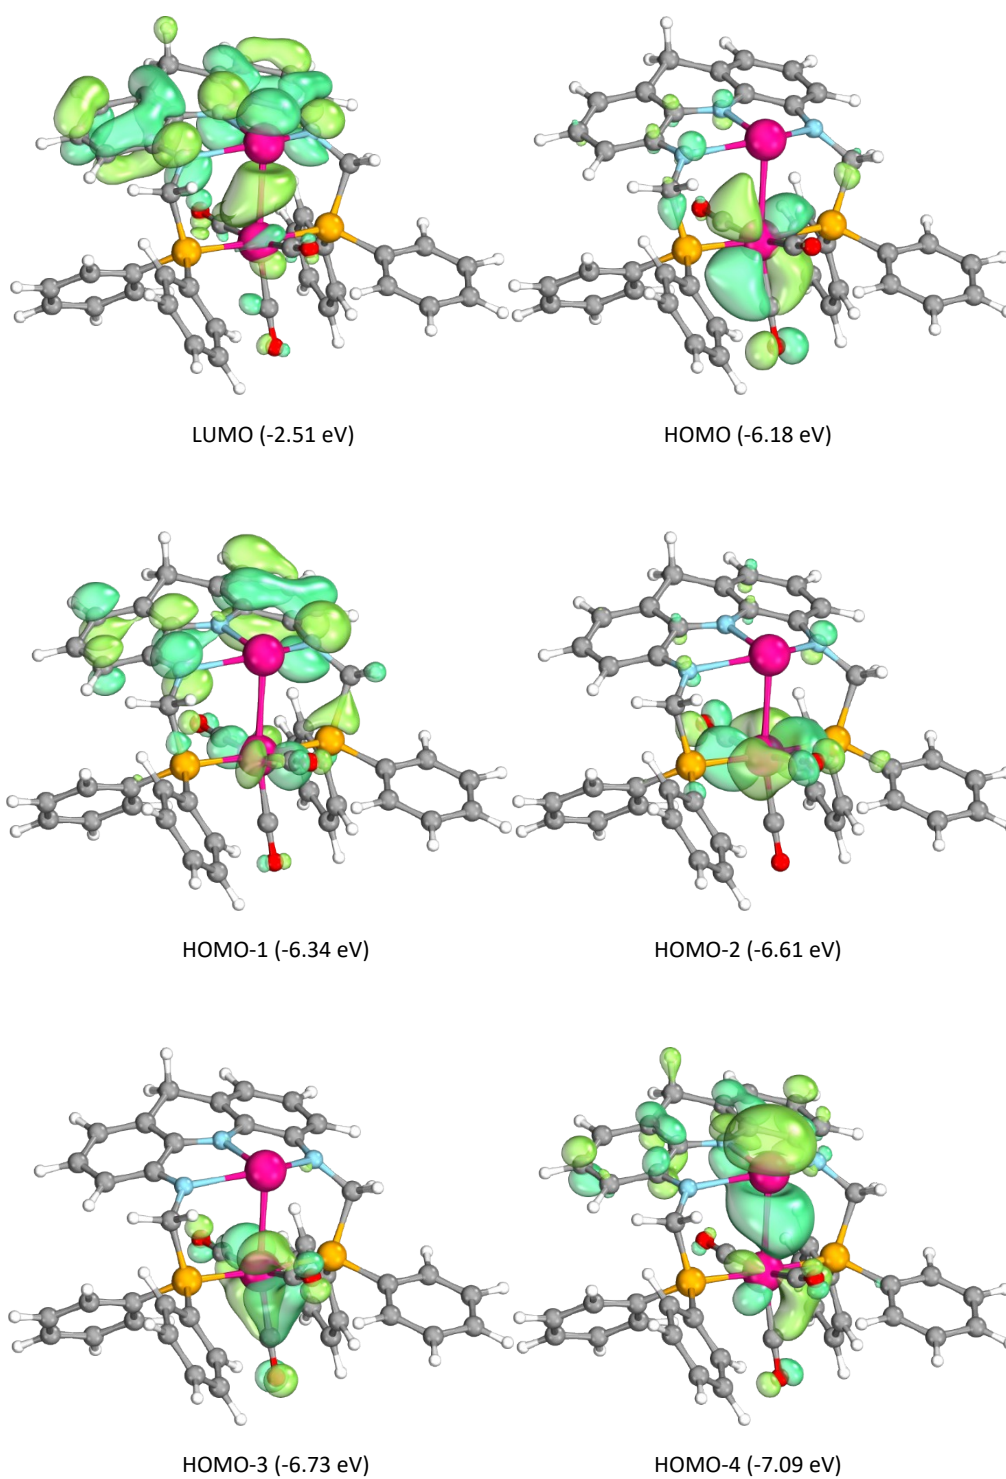

**Figure S47.** Frontier molecular orbitals of **3**.

The ORCA output for the two observed intense transitions are given in the following. State 1-3 are predicted to be of low intensity and were not further interpreted. State 4 can be described as an electronic transition of ligand and metal based orbitals into the LUMO(198a) that features major acridane  $\pi^*$  character in an antibonding interaction with the Bi(6p) orbital. Accumulation of electron density in the difference density plots is depicted in green and depletion in red.

STATE 4: E= 0.075107 au 2.044 eV 16484.0  $\text{cm}^{*-1}$   
194a -> 198a : 0.179441 (c= 0.42360426)  
195a -> 198a : 0.214403 (c= 0.46303618)  
196a -> 198a : 0.531331 (c= -0.72892465)

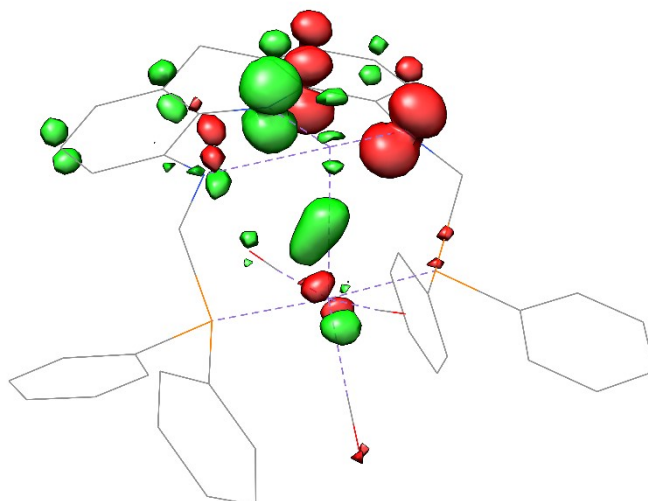

**Figure S48.** Difference density of state 4 of **3**.

State 5 features dominant charge transfer from the HOMO-4 (193a) into the LUMO showcasing the population of the Bi(6p) orbital arising from the redox-active nature of the PBiP pincer ligand.

STATE 5: E= 0.089336 au 2.431 eV 19607.0  $\text{cm}^{*-1}$   
192a -> 198a : 0.021252 (c= -0.14578136)  
193a -> 198a : 0.855611 (c= -0.92499223)  
197a -> 198a : 0.025504 (c= 0.15969874)

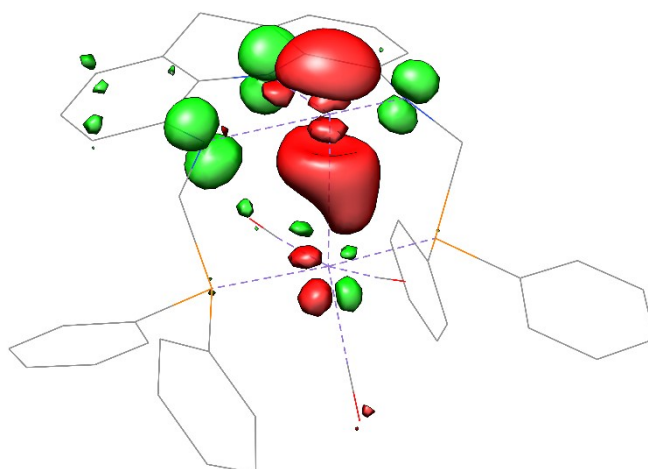

**Figure S49.** Difference density of state 5 of **3**.

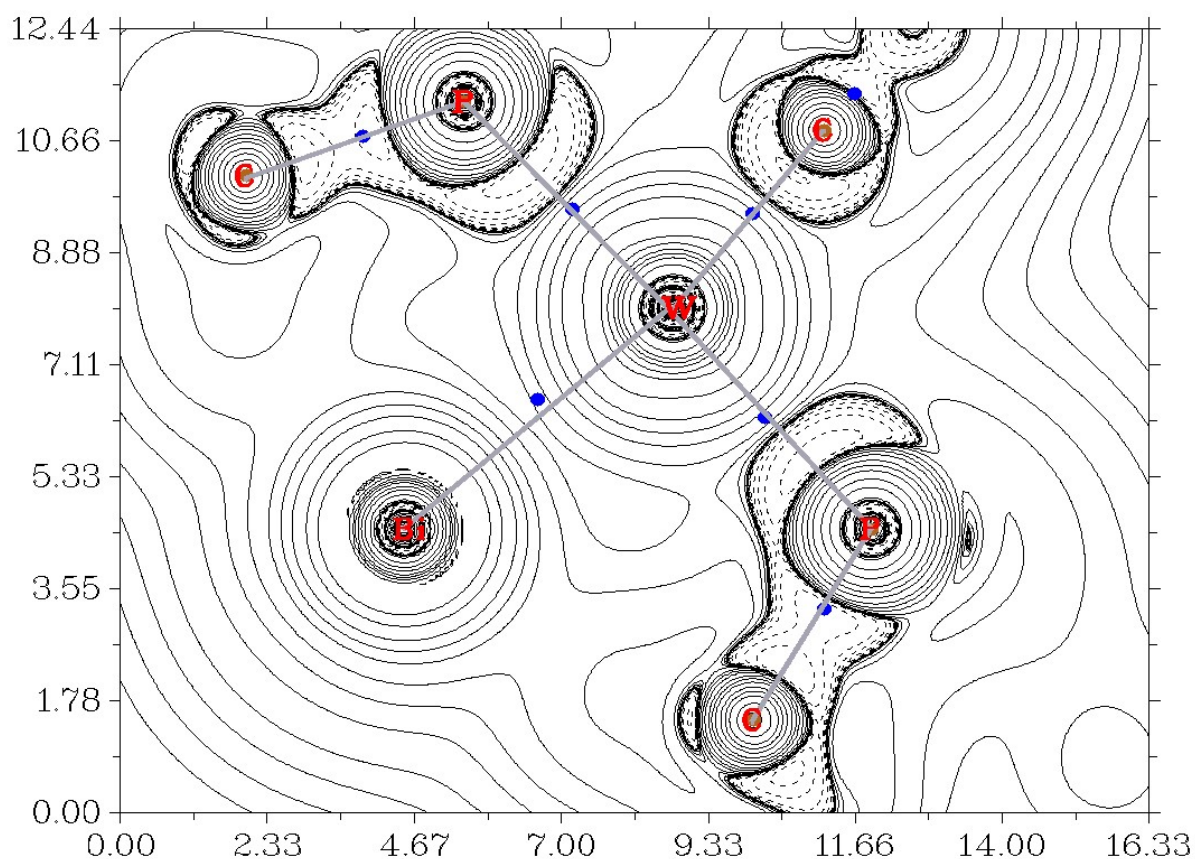

**Figure S50.** Laplacian plot of **3** in the Bi-W-P plane. Bond critical points are marked with blue dots.

**Table S2.** Characteristic BCP descriptors obtained from the QTAIM analysis of **2** and **3**.  $\rho(r)$ : density at the BCP,  $\nabla^2\rho(r)$  Laplacian of the density at the BCP,  $G(r)$  kinetic energy density at the BCP,  $V(r)$  potential energy density at the BCP,  $H(r)$  energy density at the BCP.

| Compound | Bond           | $\rho(r)$ | $\nabla^2\rho(r)$ | $G(r)$ | $V(r)$ | $H(r)$ | $\epsilon$ |
|----------|----------------|-----------|-------------------|--------|--------|--------|------------|
| <b>2</b> | Bi-N           | 0.069     | 0.170             | 0.058  | -0.074 | -0.016 | 0.25       |
|          | Bi-N           | 0.070     | 0.174             | 0.060  | -0.076 | -0.016 | 0.25       |
|          | Bi-N (central) | 0.086     | 0.208             | 0.078  | -0.103 | -0.026 | 0.26       |
| <b>3</b> | Bi-N           | 0.071     | 0.163             | 0.058  | -0.075 | -0.017 | 0.26       |
|          | Bi-N           | 0.063     | 0.156             | 0.052  | -0.065 | -0.013 | 0.25       |
|          | Bi-N (central) | 0.082     | 0.192             | 0.071  | -0.094 | -0.023 | 0.26       |
|          | W-Bi           | 0.044     | 0.052             | 0.024  | -0.034 | -0.011 | 0.26       |
|          | W-P            | 0.076     | 0.150             | 0.061  | -0.085 | -0.024 | 0.21       |
|          | W-P            | 0.0744    | 0.140             | 0.058  | -0.080 | -0.023 | 0.22       |



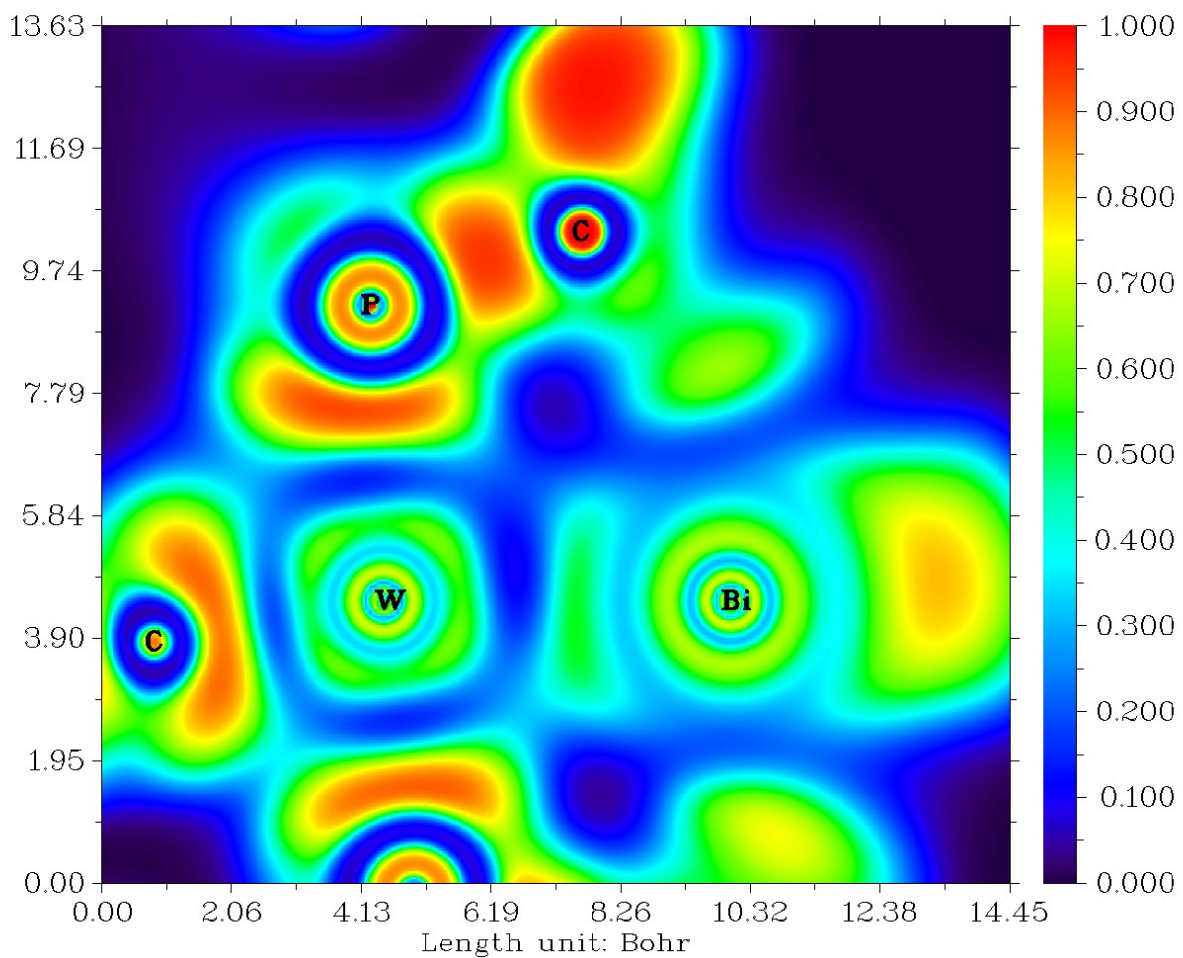

**Figure S51.** ELF plot of 3 in the Bi-W-P plane, showing accumulation of electron density between the W and Bi center.



Since a topology analysis of the Laplacian as well as the ELF of complex **3** indicate the presence of attractive interactions between Bi and W, we conducted EDA-NOCV calculations to get more insight into the orbital interactions. Here, the interaction between the  $W(CO)_3$  fragment and the ligand fragment was studied. The six orbital pairs with the highest interaction energies are shown in Figure S46. Donor orbitals are colored in red and acceptor orbitals are shown in green. Orbital pairs 1, 4 and 5 describe the bonding between the P atoms and the W center (1:  $\sigma$ -donation, 4,5:  $\pi$ -backdonation). Orbital pairs 2 and 6 show donation of electron density from the W center to the Bi center. Orbital pair 3 shows that donation of electron density from Bi to W is however also a significant contributor to the Bi-W bonding. The dual acceptor and donor properties of the Bi center agree with a partial occupation of the p-Orbital in Bi, which allows it to simultaneously act as an electron donor and acceptor.

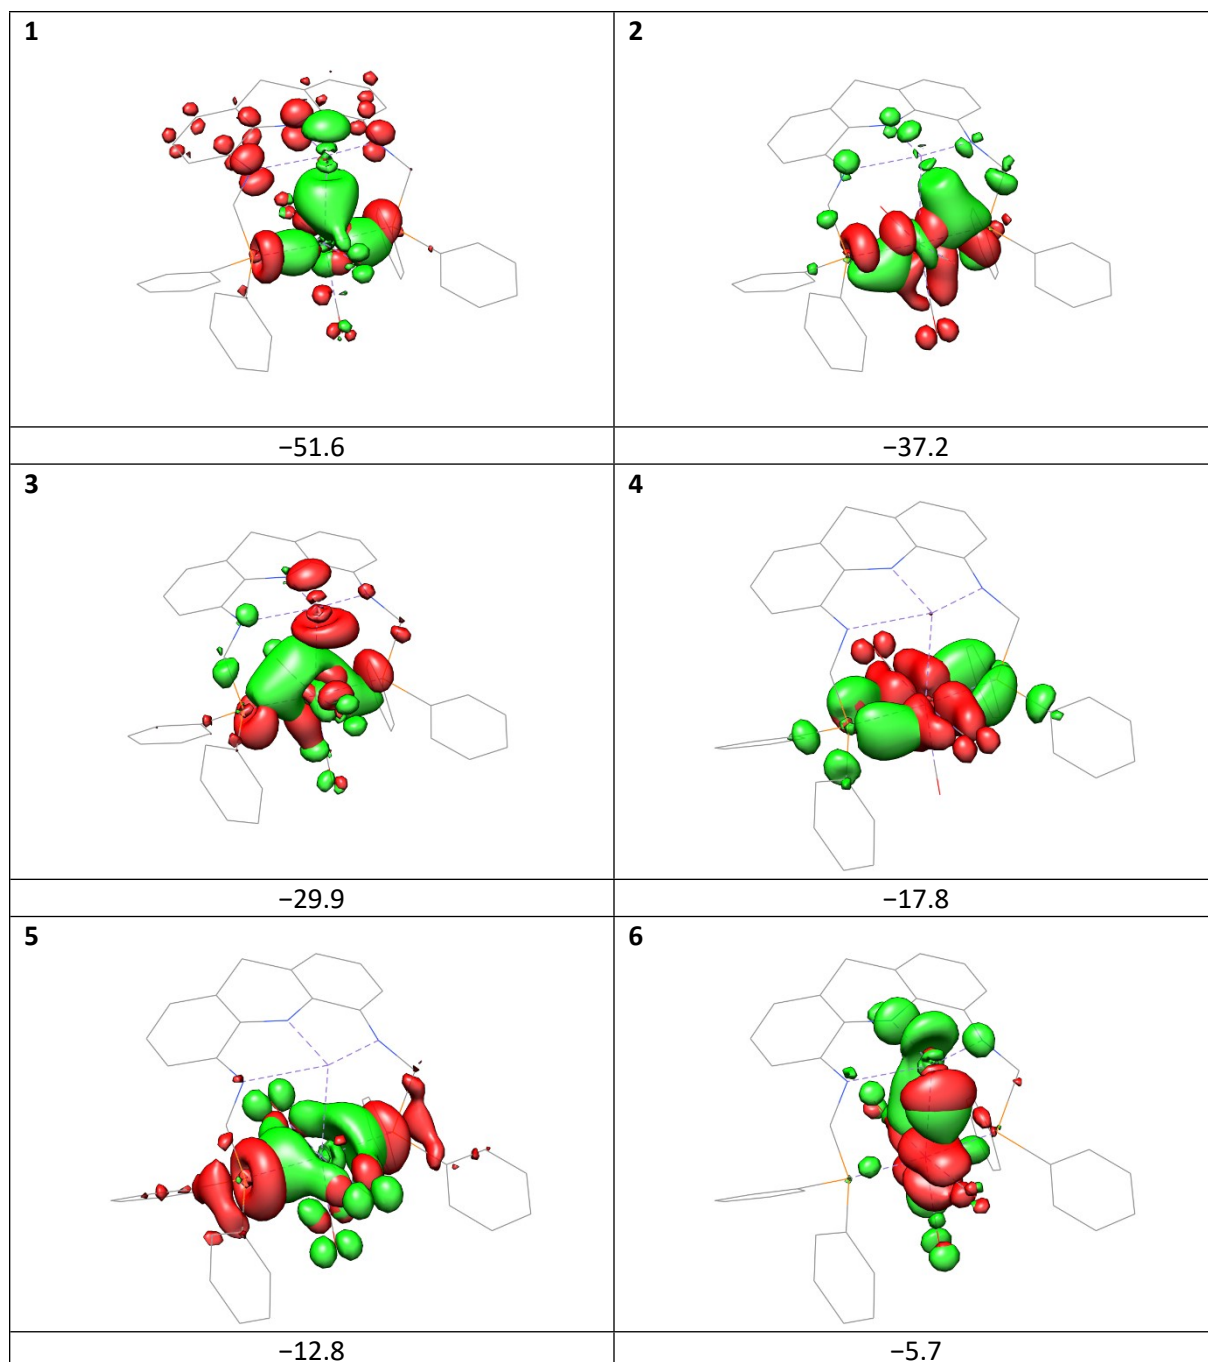

**Figure S52.** Donor and acceptor orbitals of the EDA-NOCV calculation of **3**. Orbital interaction energies are given in kcal/mol.

### Computational Analysis of 4

The Mayer bond orders (see the main text) clearly indicate the presence of bonding orbital interactions between Bi and Cl and Bi and Au, respectively. To get a more detailed insight, EDA-NOCV calculations were performed. Here, the interaction between the  $\text{Au}_3\text{Cl}_2$  fragment and the  $\text{Bi}_3$  fragment of the cluster was studied. The seven orbital pairs with the highest interaction energies are shown in Figure S47. Donor orbitals are colored in red and acceptor orbitals are shown in green. Pairs 1 – 3 account for P–Au bonding. Orbital pairs 4 – 6 are indicative of the redox-active nature of the NNN-ligand and the donation from the Bi(6p) orbital towards the Au centers. Pairs 4, 6 and 8 show the transfer of electron density from the Bi-centers to the ligand backbone, but also Bi-Au bonding interactions. Pair 5 clearly show the transfer of electron density from the NNN-ligand into Au-Bi bonding orbitals. Pair 7 shows an orbital pair which accounts for multicenter bonding between the Bi and the Cl atoms. Finally, pair 8, undoubtedly shows a bonding interaction between Au and Bi, where the Bi centers bridge the Au centers via their p-orbitals.

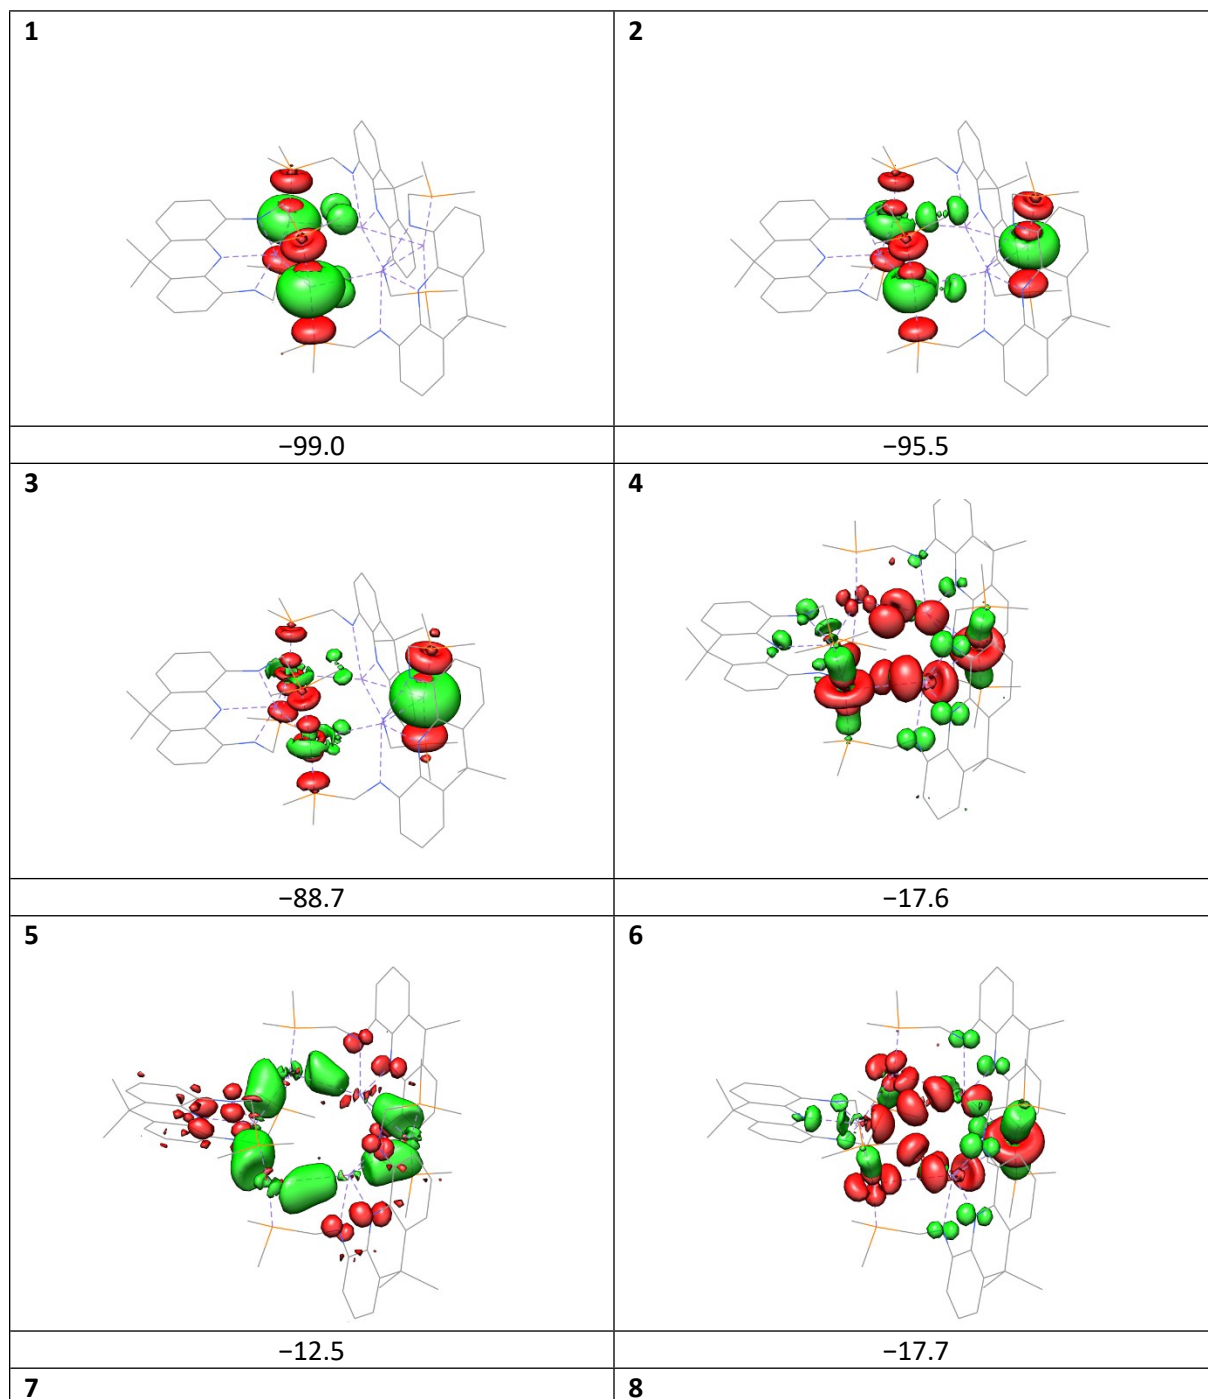

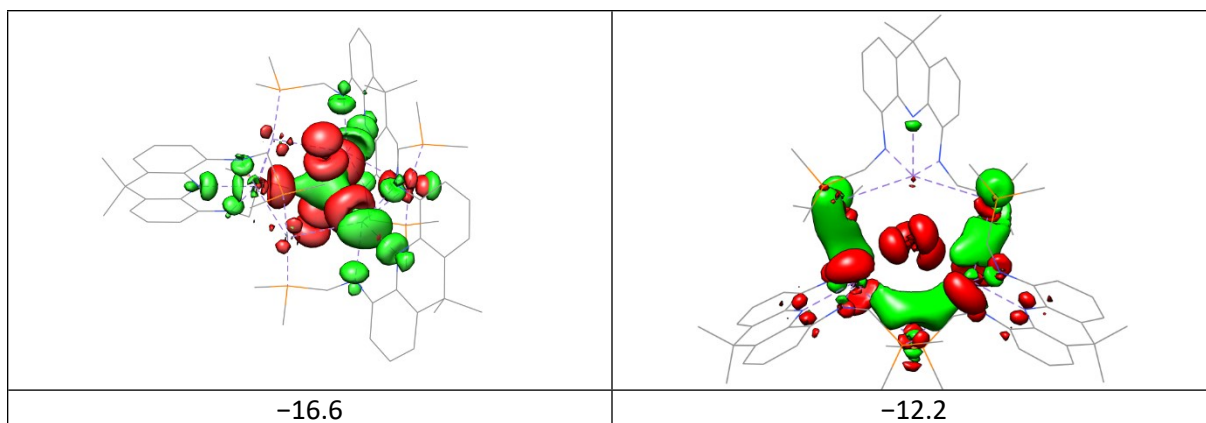

**Figure S53.** Donor and acceptor orbitals of the EDA calculation of **4**. Orbital interaction energies are given in kcal/mol.

## References

- [48] J. Underhill, E. S. Yang, T. Schmidt-Räntsch, W. K. Myers, J. M. Goicoechea and J. Abbenseth, *Chem. Eur. J.*, 2023, **29**, e202203266.
- [57] U. Mayer, V. Gutmann and W. Gerger, *Monatsh. Chem.*, 1975, **106**, 1235–1257.
- [59] J. Ramler and C. Lichtenberg, *Chem. Eur. J.*, 2020, **26**, 10250–10258.
- [60] P. Erdmann, J. Leitner, J. Schwarz and L. Greb, *ChemPhysChem*, 2020, **21**, 987–994.
- 
- [S1] C. J. Carmalt, N. A. Compton, R. J. Errington and G. A. Fisher, *Inorg. Synth.*, 1996, **31**, 99–100
- [S2] Bruker, *SAINT, V8.40B*, Bruker AXS Inc., Madison, Wisconsin, USA.
- [S3] L. Krause, R. Herbst-Irmer, G. M. Sheldrick and D. Stalke, *J. Appl. Cryst.*, 2015, **48**, 3–10.
- [S4] O. V. Dolomanov, L. J. Bourhis, R. J. Gildea, J. A. K. Howard and H. Puschmann, *J. Appl. Cryst.*, 2009, **42**, 339–341.
- [S5] C. R. Groom, I. J. Bruno, M. P. Lightfoot and S. C. Ward, *Acta Cryst.*, 2016, **B72**, 171–179.
- [S6] D. Kratzert, *FinalCif, V129*, <https://dkratzert.de/finalcif.html>.
- [S7] A. G. Buzanich, M. Radtke, K. V. Yusenko, T. M. Stawski, A. Kulow, C. T. Cakir, B. Röder, C. Naese, R. Britzke, M. Sintschuck and F. Emmerling, *J. Chem. Phys.*, 2023, **158**, 244202.
- [S8] B. Ravel and M. Newville, *J. Synchrotron Rad.*, 2005, **12**, 537–541.
- [S9] A. A. Mistonov, A.P. Chumakov, R.P. Ermakov, L.D. Iskhakova, A.V. Zakharova, A.V. Chumakova, K.O. Kvashnina, *J. Alloys Compd.*, 2018, **753**, 646–654.
- [S10] F. Neese, F. Wennmohs, U. Becker and C. Riplinger, *J. Chem. Phys.*, 2020, **152**, 224108.
- [S11] R. A. Kendall, H. A. Früchtel, *Theor. Chem. Acc.*, 1997, **97**, 158–163.
- [S12] F. Neese, F. Wennmohs, A. Hansen and U. Becker, *Chem. Phys.*, 2009, **356**, 98–109.
- [S13] S. Grimme, S. Ehrlich and L. Goerigk, *J. Comput. Chem.*, 2011, **32**, 1456–1465.
- [S14] S. Grimme, J. Antony, S. Ehrlich and H. Krieg, *J. Chem. Phys.*, 2010, **132**, 154104.
- [S15] F. Weigend and R. Ahlrichs, *Phys. Chem. Chem. Phys.*, 2005, **7**, 3297–3305.
- [S16] M. Cossi, N. Rega, G. Scalmani, V. Barone, *J. Comput. Chem.*, 2003, **24**, 669–681.
- [S17] J. Tao, J. P. Perdew, V. N. Staroverov, G. E. Scuseria, *Phys. Rev. Lett.*, 2003, **91**, 146401.
- [S18] T. Lu, F. Chen, *J. Comput. Chem.*, 2012, **33**, 580–592.
- [S19] Y. Zhao and D. G. Truhlar, *J. Phys. Chem. A*, 2005, **109**, 5656–5667.
